# Supplementary material for: Chiral macrocyclic terpyridine complexes
Source: Royal Society of Chemistry journal article supplement (doi:10.1039/c7sc05285e), 2018-01-01
Supplement: c7sc05285e1.pdf [file c7sc05285e1.pdf]

## *Supporting Information*

# **Chiral Macrocyclic Terpyridine Complexes**

Thomas Brandl<sup>a</sup>, Viktor Hoffmann<sup>a</sup>, Andrea Pannwitz<sup>a</sup>, Daniel Häussinger<sup>a</sup>, Markus Neuburger<sup>a</sup>, Olaf Fuhr<sup>b</sup>,  
Stefan Bernhard<sup>c</sup>, Oliver S. Wenger<sup>a</sup>, Marcel Mayor<sup>\*a,b,d</sup>

---

- a Department of Chemistry  
University of Basel  
St. Johanns-Ring 19  
4056 Basel, Switzerland  
E-mail: [marcel.mayor@unibas.ch](mailto:marcel.mayor@unibas.ch)
- b Institute for Nanotechnology (INT)  
Karlsruhe Institute of Technology (KIT)  
P. O. Box 3640  
76021 Karlsruhe, Germany
- c Department of Chemistry  
Carnegie Mellon University  
Pittsburgh  
Pennsylvania 15213, USA
- d Lehn Institute of Functional Materials (LFM)  
Sun Yat Sen University (SYSU), XinGangXi Rd. 135  
510275 Guangzhou (P. R. China)

## Table of Contents:

|                                                                                                                                                                                         |     |
|-----------------------------------------------------------------------------------------------------------------------------------------------------------------------------------------|-----|
| Table of Contents .....                                                                                                                                                                 | S2  |
| Synthetic procedures .....                                                                                                                                                              | S3  |
| <sup>1</sup> H-, <sup>13</sup> C-NMR (CDCl <sub>3</sub> , 400/101 MHz, 22 °C) and HR-ESI spectra of <b>L2</b> .....                                                                     | S13 |
| <sup>1</sup> H-, <sup>13</sup> C-NMR (CDCl <sub>3</sub> , 600/151 MHz, 25 °C) and HR-ESI spectra of <b>L1</b> .....                                                                     | S15 |
| <sup>1</sup> H-, <sup>13</sup> C-NMR (CDCl <sub>3</sub> , 600/151 MHz, 25 °C) and HR-ESI spectra of <b>Fe(L1)<sub>2</sub></b> .....                                                     | S17 |
| <sup>1</sup> H-, <sup>13</sup> C-NMR, COSY, NOESY, HMBC, HMQC (CDCl <sub>3</sub> , 600/101/150 MHz, 25 °C) and HR-ESI spectra of <b>Fe(L1)<sub>2</sub>-c</b> with full assignment ..... | S19 |
| <sup>1</sup> H-, <sup>13</sup> C-NMR (CDCl <sub>3</sub> , 400/101 MHz, 22 °C) and HR-ESI spectra of <b>Ru(L2)<sub>2</sub></b> .....                                                     | S24 |
| <sup>1</sup> H-, <sup>13</sup> C-NMR (CDCl <sub>3</sub> , 600/151 MHz, 25 °C) and HR-ESI spectra of <b>Ru(L1)<sub>2</sub></b> .....                                                     | S26 |
| <sup>1</sup> H-, <sup>13</sup> C-NMR, COSY, NOESY, HMBC, HMQC (CDCl <sub>3</sub> , 600/151 MHz, 25 °C) and HR-ESI spectra of <b>Ru(L1)<sub>2</sub>-c</b> with full assignment .....     | S28 |
| Decay of emission signal of the complexes <b>Ru(L1)<sub>2</sub>-c</b> and <b>Ru(L1)<sub>2</sub></b> at 77 K .....                                                                       | S33 |
| UV-Vis spectroscopy .....                                                                                                                                                               | S34 |
| Cyclic Voltammetry measurements .....                                                                                                                                                   | S35 |
| Computational Methodology .....                                                                                                                                                         | S36 |
| Racemization experiment and determination of the inversion barrier of <b>Fe(L1)<sub>2</sub>-c</b> : .....                                                                               | S37 |
| Crystal data for <b>Ru(L1)<sub>2</sub>-c</b> and <b>Fe(L1)<sub>2</sub>-c</b> : .....                                                                                                    | S46 |
| HPLC Chromatograms .....                                                                                                                                                                | S53 |
| High dilution macrocyclization experiment of the free ligand <b>L1</b> .....                                                                                                            | S54 |

## Synthetic procedures:

General Procedures: All chemicals were directly used for the synthesis without further purification, unless stated differently. Solvents for electrochemical and photophysical measurements were HPLC grade. Reaction vessels used for acetylene deprotection were washed with concentrated sulfuric acid to prevent copper promoted oxidative acetylene homocoupling. Dry solvents were used as crown cap and purchased from *Acros Organics* and *Sigma-Aldrich*. NMR solvents were obtained from *Cambridge Isotope Laboratories, Inc.* (Andover, MA, USA).  $^1\text{H-NMR}$  and  $^{13}\text{C-NMR}$  were recorded on a *Bruker DPX-NMR* (400 MHz) instrument or on a *Bruker Ascend 600 MHz Avance III HD*. Chemical shifts ( $\delta$ ) are reported in parts per million (ppm) relative to the residual solvent peak. Coupling constants ( $J$ ) are given in hertz (Hz). Gas Chromatography (GC-MS) was performed on a *Shimadzu GCMS-QP2010 SE* gas chromatograph system, with a *ZB-5HT inferno* column (30 m x 0.25 mm x 0.25 mm), at 1 mL/min He-flow rate (split = 20:1) with a *Shimadzu* mass detector (EI 70 eV) was used. For high resolution mass spectra (HRMS) a HR-ESI-ToF-MS measurement on a *maXis<sup>TM</sup> 4G* instrument from *Bruker* was performed. MALDI-ToF mass spectra were performed on a *Bruker microflex<sup>TM</sup>* mass spectrometer, calibrated with  $\text{CsI}_3$ , and  $\alpha$ -cyano-4-hydroxycinnamic acid (unless stated differently) was used as matrix Column chromatography was performed with *SiliaFlash<sup>®</sup> P60* from *SILICYCLE* with a particle size of 40-63  $\mu\text{m}$  (230-400 mesh) and for TLC *Silica gel 60 F<sub>254</sub>* glass plates with a thickness of 0.25 mm from *Merck* were used. The detection was observed with a UV-lamp at 254 or 366 nm. Gel Permeation Chromatography (GPC) was performed on a *Shimadzu Prominence System* with *PSS SDV* preparative columns from *PSS* (2 columns in series: 600 mm x 20.0 mm, 5  $\mu\text{m}$  particles, linear porosity "S", operating ranges: 100 – 100 000  $\text{g}\cdot\text{mol}^{-1}$ ) using chloroform as eluent. For HPLC a *Shimadzu LC-20AD* and a *LC-20AT HPLC*, respectively, was used equipped with a diodearray UV/Vis detector (*SPD-M10A VP* from *Shimadzu*,  $\lambda = 200\text{-}600$  nm) and a column oven *Shimadzu CTO-20AC*. The used column for reverse phase was a *Reprosil 100 C18*, 5  $\mu\text{m}$ , 250 x 16 mm; *Dr. Maisch GmbH* and for chiral separation a *Chiralpak IB*, 5  $\mu\text{m}$ , 4.6 x 250 mm; *Daicel Chemical Industries Ltd.* CD measurements were performed with a *Chirascan CD Spectrometer* in acetonitrile at room temperature in 1 cm quartz glass cuvettes.

### ((2-Bromophenyl)ethynyl)triisopropylsilane (**4**):

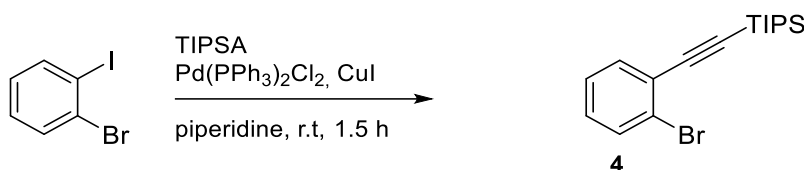

An oven-dried 25 mL Schlenk tube was purged with argon and charged with 1-bromo-2-iodobenzene (3.30 g, 11.7 mmol, 1.0 eq.), bis(triphenylphosphine) palladium(II) chloride (207 mg, 293  $\mu$ mol, 2 mol-%), copper(I) iodide (89.6 mg, 468  $\mu$ mol, 4 mol-%) and piperidine (30 mL). The mixture was degassed with argon for 15 minutes and then (triisopropylsilyl) acetylene (2.79 mL, 12.1 mmol, 1.03 eq.) was added. The reaction mixture was stirred at room temperature overnight. After TLC confirmed full consumption of the starting material, the reaction was stopped by removing the solvent under reduced pressure. The remains were eluted with CH<sub>2</sub>Cl<sub>2</sub> and again concentrated on Celite to purify the crude product via flash column chromatography (cyclohexane/ethyl acetate = 20:1) to obtain a pale orange liquid (4.00 g, 11.7 mmol, 100%).

#### Analytical data for **4**:

**<sup>1</sup>H NMR** (400 MHz, CDCl<sub>3</sub>, 22 °C)  $\delta$  = 7.57 (dd, <sup>3</sup>J<sub>H,H</sub> = 7.9, <sup>4</sup>J<sub>H,H</sub> = 1.3 Hz, 1H), 7.52 – 7.49 (m, 1H), 7.23 (dd, <sup>3</sup>J<sub>H,H</sub> = 7.6, <sup>4</sup>J<sub>H,H</sub> = 1.3 Hz, 1H), 7.15 (ddd, <sup>3</sup>J<sub>H,H</sub> = 8.0, <sup>3</sup>J<sub>H,H</sub> = 7.4, <sup>4</sup>J<sub>H,H</sub> = 1.7 Hz, 1H), 1.15 (m, 21H) ppm.

**<sup>13</sup>C NMR** (101 MHz, CDCl<sub>3</sub>, 22 °C)  $\delta$  = 134.00, 132.50, 129.50, 126.97, 125.90, 125.81, 104.91, 96.34, 18.82, 11.46 ppm.

**GC-MS** (EI +, 70 eV): m/z (%) = 336 (4) [M<sup>+</sup>], 293 (100) [M<sup>+</sup>-C<sub>3</sub>H<sub>7</sub>], 267 (32), 251 (23), 237 (32), 223 (41), 129 (33).

The analytical data are in agreement with the ones reported in reference [1].

<sup>1</sup>T. Ide, S. Sakamoto, D. Takeuchi, K. Osakada, S. Machida, *J. Org. Chem.* **2012**, *77*, 4837–4841.

**(2-((Triisopropylsilyl)ethynyl)phenyl)boronic acid (2):**

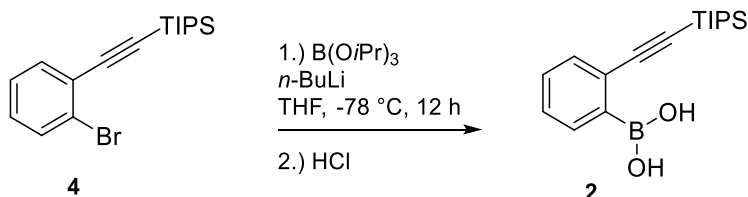

An oven-dried two-necked round-bottomed flask was charged with 1-bromo-2-(triisopropylsilyl)ethynylbenzene (**4**, 2.00 g, 5.93 mmol, 1.0 eq.) and dry THF (30 mL). The reaction mixture was cooled to -78 °C, before *n*-BuLi (1.6 M in hexane, 7.41 mL, 11.9 mmol, 2.0 eq.) was added dropwise. After 30 minutes, B(OiPr)<sub>3</sub> (3.43 mL, 14.8 mmol, 2.0 eq.) was added and the reaction mixture was stirred at -78 °C gradually warming up to room temperature overnight. The reaction was quenched with aqueous HCl solution (1 M, 20 mL) and then extracted with Et<sub>2</sub>O, dried over MgSO<sub>4</sub>, filtered and concentrated under reduced pressure. The residue was purified by flash column chromatography (cyclohexane/ethyl acetate = 10:1) to give the title compound as a white solid (1.66 g, 5.48 mmol, 92%).

**Analytical data for 2:**

<sup>1</sup>H NMR (400 MHz, CDCl<sub>3</sub>, 22 °C) δ = 8.01 – 7.96 (m, 1H), 7.56 – 7.52 (m, 1H), 7.40 (m, 2H), 5.81 (s, 2H), 1.16 (m, 21H) ppm.

**ESI-MS (MeCN, positive mode):** *m/z* 609.4 [2M - H<sub>2</sub>O + Na<sup>+</sup>].

The analytical data are in agreement with the ones reported in reference [1].

<sup>1</sup> T. Ide, S. Sakamoto, D. Takeuchi, K. Osakada, S. Machida, *J. Org. Chem.* **2012**, *77*, 4837–4841.

#### 4,4''-Bis(2-((triisopropylsilyl)ethynyl)phenyl)-2,2':6',2''-terpyridine (L2):

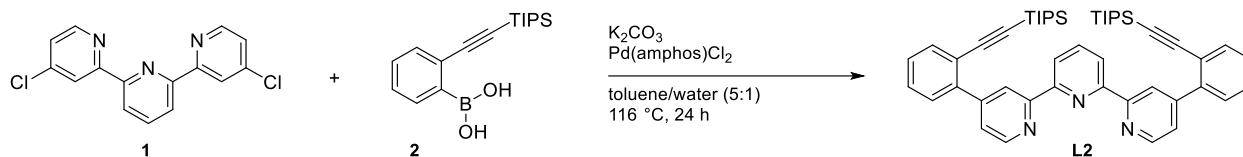

A 50 mL round bottom flask was set under argon atmosphere and was charged with 4,4''-dichloro-2,2':6',2''-terpyridine (**1**, 187 mg, 619  $\mu$ mol, 1.0 eq.), (2-((triisopropylsilyl)ethynyl)phenyl)boronic acid (**2**, 748 mg, 2.47 mmol, 4.0 eq.),  $K_2CO_3$  (173 mg, 1.24 mmol, 2.0 eq.), bis(di-tert-butyl(4-dimethylaminophenyl)phosphine)dichloropalladium(II) (21.9 mg, 31.0  $\mu$ mol, 5 mol-%) and the solvents toluene/water (30/6). The reaction mixture was degassed before it was heated to 116 °C for 18 hours. After TLC confirmed full conversion of the starting material, the reaction was stopped, the aqueous phase was extracted with  $CH_2Cl_2$ . The combined organic layers were washed with brine, dried over  $MgSO_4$ , filtered and concentrated under reduced pressure. The crude product was purified by column chromatography (cyclohexane:ethyl acetate = 10:1 + 2%  $NH_4OH$ ) and GPC to yield the desired product as colorless oil (401 mg, 619  $\mu$ mol, 87%).

#### Analytical data for L2:

$^1H$  NMR (600 MHz,  $CDCl_3$ , 25 °C):  $\delta$  = 8.70 (dd,  $^3J_{H,H}$  = 5.0,  $^4J_{H,H}$  = 0.8 Hz, 2H), 8.67 (dd,  $^4J_{H,H}$  = 1.8,  $^4J_{H,H}$  = 0.8 Hz, 2H), 8.47 (d,  $^3J_{H,H}$  = 7.8 Hz, 2H), 7.98 (t,  $^3J_{H,H}$  = 7.8 Hz, 1H), 7.63 (dd,  $^3J_{H,H}$  = 7.7,  $^4J_{H,H}$  = 1.4 Hz, 2H), 7.60 (dd,  $^3J_{H,H}$  = 5.0,  $^4J_{H,H}$  = 1.8 Hz, 2H), 7.46 (dd,  $^3J_{H,H}$  = 7.6,  $^4J_{H,H}$  = 1.3 Hz, 2H), 7.40 (td,  $^3J_{H,H}$  = 7.6,  $^4J_{H,H}$  = 1.5 Hz, 2H), 7.35 (td,  $^3J_{H,H}$  = 7.5,  $^4J_{H,H}$  = 1.4 Hz, 2H), 0.89 (s, 42H) ppm.

$^{13}C$  NMR (151 MHz,  $CDCl_3$ , 25 °C)  $\delta$  = 156.4, 155.9, 149.3, 148.8, 141.9, 137.8, 134.1, 129.3, 128.8, 128.2, 124.5, 122.2, 121.8, 121.4, 105.4, 95.4, 18.6, 11.3.

HRMS (ESI-ToF): calc. for  $[C_{49}H_{59}N_3Si_2 + H]^+$  746.4319; found 746.4320.

#### 4,4''-Bis(2-ethynylphenyl)-2,2':6',2''-terpyridine (L1):

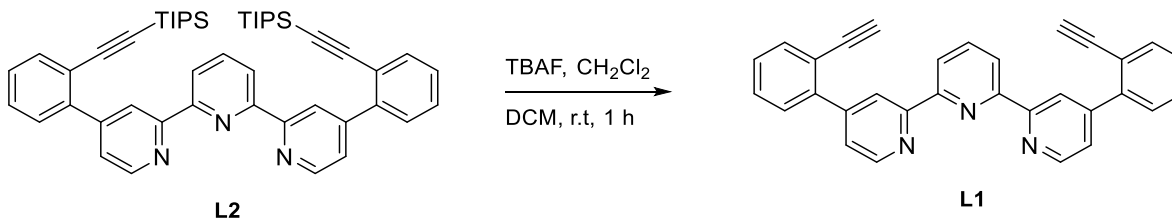

A 100 mL round-bottomed flask was set under argon atmosphere and was charged with 4,4''-bis(2-((triisopropylsilyl)ethynyl)phenyl)-2,2':6',2''-terpyridine (**L2**, 276 mg, 370  $\mu\text{mol}$ , 1.0 eq). The compound was dissolved in  $\text{CH}_2\text{Cl}_2$  (80 mL), and the solution was degassed for 15 min with an argon stream. TBAF (1 M in THF, 1.70 ml, 1.70 mmol, 4.6 eq.) was added and the mixture was stirred overnight at room temperature. After TLC showed complete conversion of the starting material, the reaction was quenched with water.  $\text{CH}_2\text{Cl}_2$  was removed under reduced pressure and the aqueous suspension was filtered. The residue was washed with methanol and hexane several times to get rid of remaining silyl side products and other impurities. After drying under high vacuum, the product was obtained as a white solid (161 mg, 364  $\mu\text{mol}$ , 100%).

#### Analytic data for L1:

**$^1\text{H}$  NMR** (600 MHz,  $\text{DMSO}-d_6$ , 85  $^\circ\text{C}$ )  $\delta$  = 8.84 (d,  $^4J_{\text{H,H}} = 1.6$  Hz, 2H), 8.79 (d,  $^3J_{\text{H,H}} = 5.0$  Hz, 2H), 8.50 (d,  $^3J_{\text{H,H}} = 7.8$  Hz, 2H), 8.14 (t,  $^3J_{\text{H,H}} = 7.8$  Hz, 1H), 7.68 – 7.64 (m, 4H), 7.61 (dd,  $^3J_{\text{H,H}} = 7.8$ ,  $^4J_{\text{H,H}} = 1.4$  Hz, 2H), 7.56 (td,  $^3J_{\text{H,H}} = 7.6$ ,  $^4J_{\text{H,H}} = 1.4$  Hz, 2H), 7.49 (td,  $^3J_{\text{H,H}} = 7.5$ ,  $^4J_{\text{H,H}} = 1.4$  Hz, 2H), 3.94 (s, 2H) ppm.

**$^{13}\text{C}$  NMR** (151 MHz,  $\text{DMSO}-d_6$ , 85  $^\circ\text{C}$ ): 154.6, 154.3, 148.5, 147.4, 140.2, 137.5, 133.0, 128.7, 128.5, 128.0, 123.2, 120.2, 120.1, 119.3, 83.1, 81.5 ppm.

**HRMS (ESI-ToF)**: calc. for  $[\text{C}_{31}\text{H}_{19}\text{N}_3 + \text{H}]^+$  434.1644; found 434.1652.

## Bis(4,4''-bis(2-ethynylphenyl)-2,2':6',2''-terpyridine) iron hexafluorophosphate (Fe(L1)<sub>2</sub>)

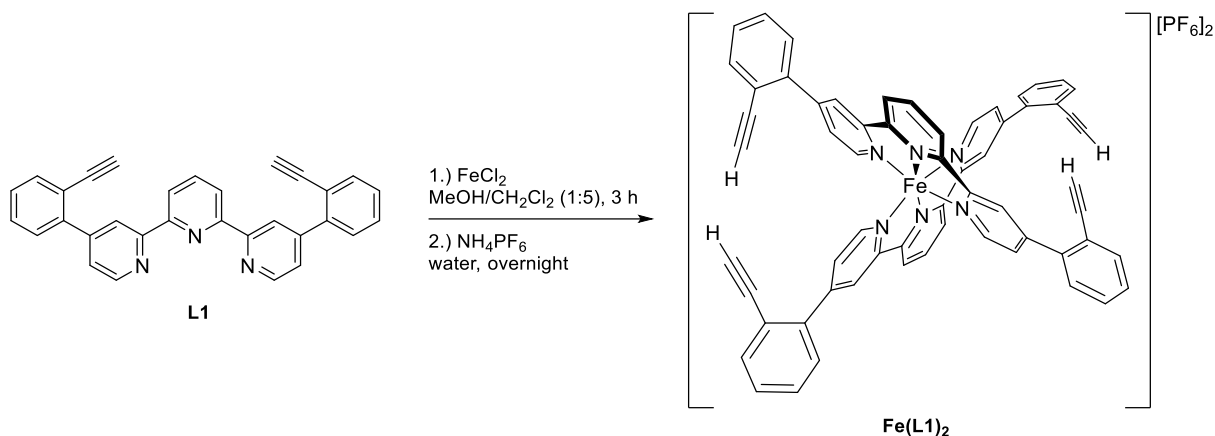

A 250 mL round-bottomed flask was charged with 4,4''-bis(2-ethynylphenyl)-2,2':6',2''-terpyridine (**L1**, 30.0 mg, 69.2  $\mu$ mol, 2.0 eq.), FeCl<sub>2</sub> (8.77 mg, 69.2  $\mu$ mol, 2.0 eq.), MeOH (50 mL) and CH<sub>2</sub>Cl<sub>2</sub> (50 mL). The reaction mixture was stirred for 24 hours. The solvent was removed under reduced pressure. Water was added and the aqueous phase was extracted with *t*BME to remove organic impurities. Then, ammonium hexafluorophosphate (564 mg, 3.46 mmol, 100 eq.) was added in order to exchange the counter ion and make it soluble in organic compounds. The aqueous phase was extracted with CH<sub>2</sub>Cl<sub>2</sub>. The combined organic layers were dried over MgSO<sub>4</sub>, filtered and concentrated under reduced pressure to yield the product as purple solid (39.9 mg, 33.0  $\mu$ mol, 95%).

### Analytic data for Fe(L1)<sub>2</sub>:

<sup>1</sup>H NMR (600 MHz, Acetone-*d*<sub>6</sub>, 25 °C)  $\delta$  = 9.42 (d, <sup>3</sup>*J*<sub>H,H</sub> = 8.1 Hz, 4H), 9.08 (d, <sup>4</sup>*J*<sub>H,H</sub> = 1.7 Hz, 4H), 8.93 (t, <sup>3</sup>*J*<sub>H,H</sub> = 8.1 Hz, 2H), 7.70 – 7.65 (m, 4H), 7.62 – 7.49 (m, 20H), 3.66 (s, 4H) ppm.

<sup>13</sup>C NMR (151 MHz, Acetone- *d*<sub>6</sub>, 25 °C)  $\delta$  = 161.4, 159.0, 153.6, 151.2, 139.5, 139.4, 135.2, 130.7, 130.7, 130.5, 128.3, 125.1, 125.0, 121.2, 84.3, 82.2 ppm.

**HRMS (ESI-ToF):** calc. for [C<sub>62</sub>H<sub>38</sub>FeN<sub>6</sub>]<sup>2+</sup> 461.1249; found 461.1249.



### Homocoupling of the previous formed iron complex (Fe(L1)<sub>2</sub>-c):

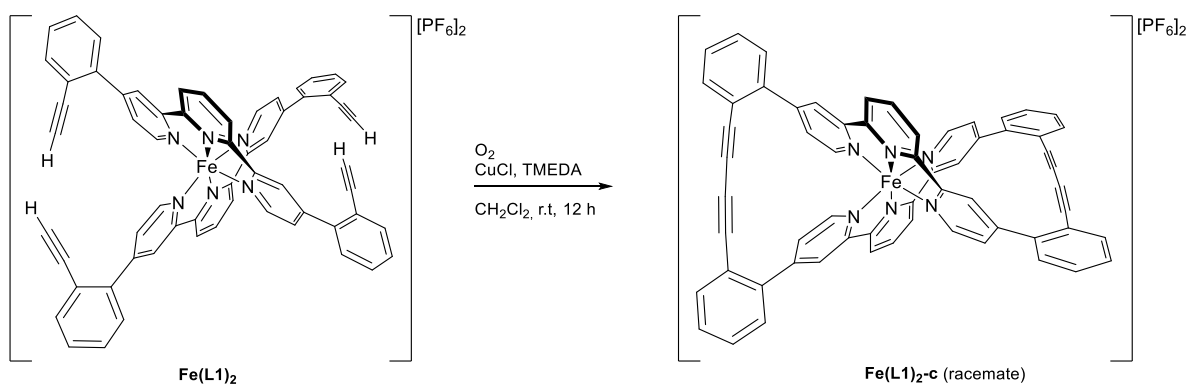

A 250 mL round-bottomed flask was charged with  $\text{CH}_2\text{Cl}_2$  (100 mL),  $\text{CuCl}$  (11.9 mg, 116  $\mu\text{mol}$ , 4.1 eq.) and  $\text{TMEDA}$  (17.7  $\mu\text{L}$ , 116  $\mu\text{mol}$ , 4.1 eq.). The reaction mixture was saturated with oxygen. The previously formed complex ( $\text{Fe(L1)}_2$ , 34.0 mg, 28.0  $\mu\text{mol}$ , 1.0 eq.) was dissolved in  $\text{CH}_2\text{Cl}_2$  (10 mL) and added slowly to the reaction mixture. The solution was stirred overnight under an oxygen atmosphere. After TLC control (RP,  $\text{MeCN:H}_2\text{O} = 9:1$ ) indicated full conversion, the reaction was diluted with  $\text{CH}_2\text{Cl}_2$ , washed with water, dried over  $\text{MgSO}_4$  and concentrated under reduced pressure. The remaining solid was sonicated with hexane and centrifuged twice to remove organic impurities to yield the desired product as purple solid (25.0 mg, 21.0  $\mu\text{mol}$ , 88%).

### Analytical data for $\text{Fe(L1)}_2\text{-c}$ :

**$^1\text{H NMR}$**  (600 MHz,  $\text{Acetone-}d_6$ , 25  $^\circ\text{C}$ )  $\delta = 9.38$  (d,  $^3J_{\text{H,H}} = 8.1$  Hz, 4H), 8.89 (t,  $^3J_{\text{H,H}} = 8.0$  Hz, 2H), 8.82 (d,  $^4J_{\text{H,H}} = 1.7$  Hz, 4H), 7.66 (dd,  $^3J_{\text{H,H}} = 7.6$ ,  $^4J_{\text{H,H}} = 1.3$  Hz, 4H), 7.65 – 7.61 (m, 8H), 7.57 (td,  $^3J_{\text{H,H}} = 7.7$ ,  $^4J_{\text{H,H}} = 1.3$  Hz, 4H), 7.49 (dd,  $^3J_{\text{H,H}} = 7.4$ ,  $^4J_{\text{H,H}} = 1.2$  Hz, 4H), 7.31 (dd,  $^3J_{\text{H,H}} = 5.8$ ,  $^4J_{\text{H,H}} = 1.8$  Hz, 4H) ppm.

**$^{13}\text{C NMR}$**  (151 MHz,  $\text{Acetone-}d_6$ , 25  $^\circ\text{C}$ ):  $\delta = 161.6$ , 160.3, 159.6, 153.3, 152.7, 143.4, 139.7, 133.2, 131.1, 130.5, 129.3, 129.1, 125.4, 125.0, 121.1, 81.6 ppm.

**HRMS (ESI-ToF)**: calc. for  $[\text{C}_{62}\text{H}_{34}\text{FeN}_6]^{2+}$  459.1095; found 459.1092.

**Bis(4,4''-bis(2-((triisopropylsilyl)ethynyl)phenyl)-2,2':6',2''-terpyridine) ruthenium hexafluorophosphate (Ru(L2)<sub>2</sub>):**

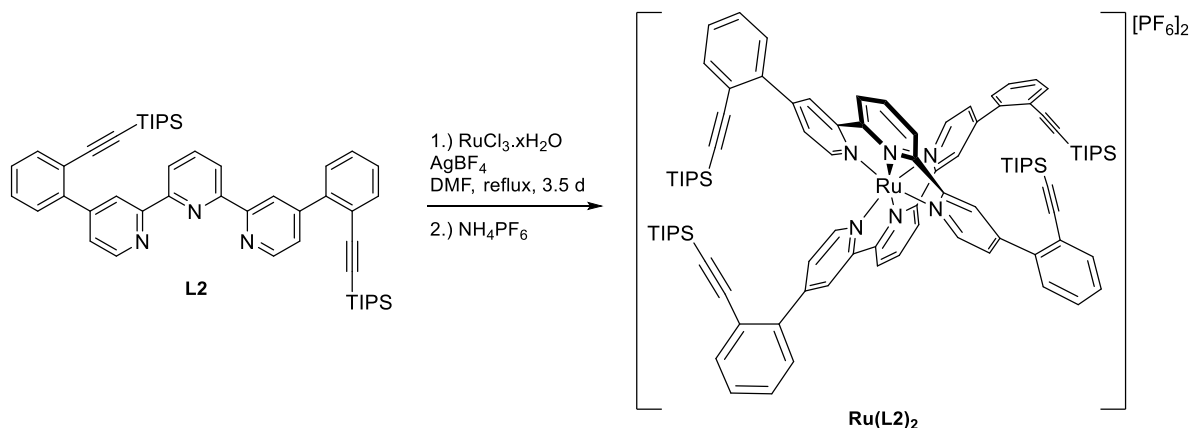

Adapted to a known literature procedure,<sup>[4]</sup> a 25 mL two-necked flask was charged with RuCl<sub>3</sub>.H<sub>2</sub>O (14.5 mg, 7.00 μmol, 1.0 eq.), AgBF<sub>4</sub> (41.7 mg, 210 μmol, 3.0 eq.) and DMF (10 mL). The reaction mixture was heated to reflux for 3 hours, before a pale red colored precipitation appeared. Then, 4,4''-bis(2-((triisopropylsilyl)ethynyl)phenyl)-2,2':6',2''-terpyridine (**L2**, 110 mg, 147 μmol, 2.1 eq.) dissolved in DMF (5 mL) was added. The reaction mixture was refluxed for 3.5 days. Then, the reaction mixture was filtered through Celite (rinsed with DMF). The filtrate was treated with 0.5 M aqueous NH<sub>4</sub>PF<sub>6</sub> (30 mL) and allowed to settle overnight. The formed precipitate was filtered over Celite, was washed several times with water and Et<sub>2</sub>O and collected with MeCN. The crude product was purified several times by flash column chromatography (acetone to acetone/water = 10:1 to acetone/water/aq. sat. KNO<sub>3</sub> = 10:1:0.1) to yield the product as red solid (41.0 mg, 22.0 μmol, 31%).

**Analytic data for Ru(L2)<sub>2</sub>:**

<sup>1</sup>H NMR (400 MHz, Acetone-*d*<sub>6</sub>, 22 °C) δ = 9.39 (d, <sup>3</sup>J<sub>H,H</sub> = 8.2 Hz, 4H), 9.18 (d, <sup>4</sup>J<sub>H,H</sub> = 1.8 Hz, 4H), 8.73 (t, <sup>3</sup>J<sub>H,H</sub> = 8.1 Hz, 2H), 7.85 (dd, <sup>3</sup>J<sub>H,H</sub> = 5.8, <sup>4</sup>J<sub>H,H</sub> = 1.8 Hz, 4H), 7.81 (d, <sup>3</sup>J<sub>H,H</sub> = 5.8 Hz, 4H), 7.74 (dd, <sup>3</sup>J<sub>H,H</sub> = 7.2, <sup>4</sup>J<sub>H,H</sub> = 1.5 Hz, 4H), 7.65 – 7.55 (m, 12H), 0.87 (d, <sup>3</sup>J<sub>H,H</sub> = 6.0 Hz, 84H) ppm.

<sup>13</sup>C NMR (101 MHz, Acetone- *d*<sub>6</sub>, 22 °C) δ = 159.3, 156.6, 152.6, 151.0, 139.0, 137.3, 135.5, 130.9, 130.5, 130.5, 129.0, 125.8, 125.5, 122.3, 106.0, 96.5, 18.9, 11.8 ppm.

**HRMS (ESI-ToF):** calc. for [C<sub>98</sub>H<sub>118</sub>N<sub>6</sub>RuSi<sub>4</sub>]<sup>2+</sup> 796.3779; found 796.3766.

**Bis(4,4''-bis(2-ethynylphenyl)-2,2':6',2''-terpyridine) ruthenium hexafluorophosphate (Ru(L1)<sub>2</sub>):**

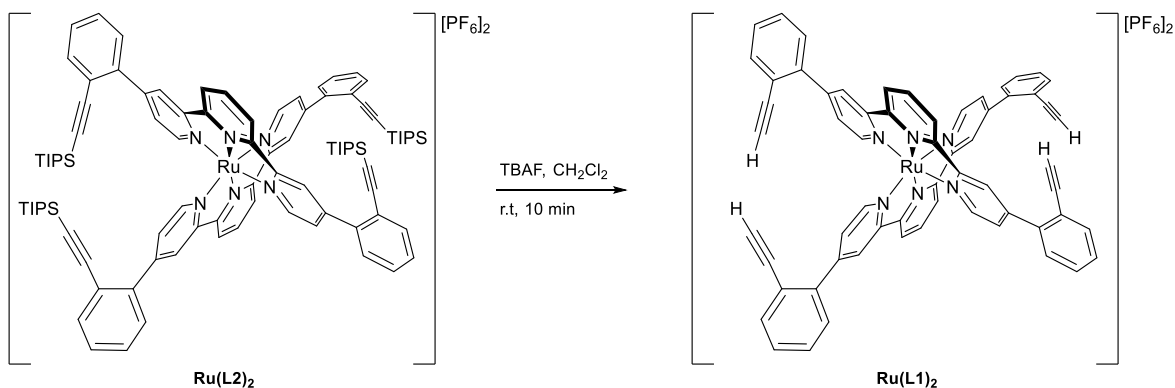

Ruthenium complex (**Ru(L2)<sub>2</sub>**, 40.9 mg, 21.9 μmol, 1.0 eq.) was placed in a dry 100 mL round-bottomed flask and was dissolved in CH<sub>2</sub>Cl<sub>2</sub> (30 mL). The solution was degassed for 15 minutes before TBAF (1 M in THF, 110 μL, 110 μmol, 5.0 eq.) was added. After 10 minutes, complete deprotection of the acetylenes was observed by MALDI-ToF analysis. The reaction was stopped by the addition of aq. sat NH<sub>4</sub>Cl, before the organic phase was separated. The aqueous phase was extracted with CH<sub>2</sub>Cl<sub>2</sub> and the combined organic layers were dried over MgSO<sub>4</sub>, filtered and concentrated under reduced pressure. The residue was purified by flash column chromatography (acetone to acetone/water = 10:1 to acetone/water/aq. sat. KNO<sub>3</sub> = 10:1:0.1) to yield the product as red solid (27.7 mg, 22.0 μmol, 100%).

**Analytic data for Ru(L1)<sub>2</sub>:**

**<sup>1</sup>H NMR** (600 MHz, Acetone-*d*<sub>6</sub>, 25 °C) δ = 9.32 (d, <sup>3</sup>J<sub>H,H</sub> = 8.1 Hz, 2H), 8.91 (d, <sup>4</sup>J<sub>H,H</sub> = 1.8 Hz, 2H), 8.61 (t, <sup>3</sup>J<sub>H,H</sub> = 8.1 Hz, 1H), 7.88 (d, <sup>3</sup>J<sub>H,H</sub> = 5.7 Hz, 2H), 7.70 – 7.54 (m, 8H), 7.42 (dd, <sup>3</sup>J<sub>H,H</sub> = 5.8, <sup>4</sup>J<sub>H,H</sub> = 1.8 Hz, 2H) ppm.

**<sup>13</sup>C NMR** (151 MHz, Acetone-*d*<sub>6</sub>, 25 °C) δ 159.8, 156.8, 152.0, 151.6, 143.3, 137.3, 133.2, 131.0, 130.4, 129.5, 129.30, 125.6, 125.5, 121.0, 81.5, 77.7 ppm.

**HRMS (ESI-ToF):** calc. for [C<sub>62</sub>H<sub>38</sub>N<sub>6</sub>Ru]<sup>2+</sup> 484.1110; found 484.1103.

### Homocoupling of the previous formed ruthenium complex (Ru(L1)<sub>2</sub>-c):

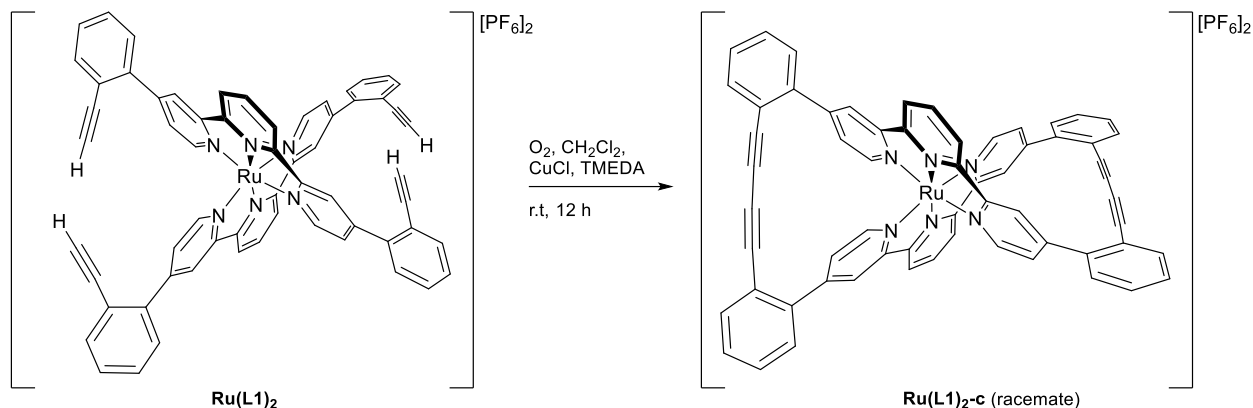

A 100 mL round-bottomed flask was filled with  $\text{CH}_2\text{Cl}_2$  (40 mL). The solvent was saturated with oxygen and charged with  $\text{CuCl}$  (11.2 mg, 110  $\mu\text{mol}$ , 5.0 eq.) and  $\text{TMEDA}$  (16.7  $\mu\text{L}$ , 110  $\mu\text{mol}$ , 5.0 eq.). The ruthenium complex ( $\text{Ru(L1)}_2$ ), 27.7 mg, 22.0  $\mu\text{mol}$ , 1.0 eq.) was dissolved in  $\text{CH}_2\text{Cl}_2$  (15 mL) and added slowly to the reaction mixture via a dropping funnel. The reaction mixture was stirred overnight. Then the organic phase was washed with water (3 x 50 mL), dried over  $\text{MgSO}_4$ , filtered and concentrated under reduced pressure. The residue was purified by flash column chromatography (acetone to acetone/water = 10:1 to acetone/water/aq. sat.  $\text{KNO}_3$  = 10:1:0.1) to yield the product as red solid (26.5 mg, 21.0  $\mu\text{mol}$ , 96%).

### Analytical data for $\text{Ru(L1)}_2\text{-c}$ :

$^1\text{H NMR}$  (600 MHz, Acetone- $d_6$ , 25 °C)  $\delta$  = 9.26 (d,  $^3J_{\text{H,H}}$  = 8.2 Hz, 2H), 8.87 (dd,  $^4J_{\text{H,H}}$  = 1.9,  $^5J_{\text{H,H}}$  = 0.7 Hz, 2H), 8.63 (t,  $^3J_{\text{H,H}}$  = 8.1 Hz, 1H), 7.89 (dd,  $^3J_{\text{H,H}}$  = 5.8,  $^5J_{\text{H,H}}$  = 0.7 Hz, 2H), 7.70 – 7.68 (m, 2H), 7.66 (td,  $^3J_{\text{H,H}}$  = 7.6,  $^4J_{\text{H,H}}$  = 1.3 Hz, 2H), 7.59 (td,  $^3J_{\text{H,H}}$  = 7.7,  $^4J_{\text{H,H}}$  = 1.3 Hz, 2H), 7.54 (dd,  $^3J_{\text{H,H}}$  = 7.8,  $^4J_{\text{H,H}}$  = 1.2 Hz, 2H), 7.44 (dd,  $^3J_{\text{H,H}}$  = 5.7,  $^4J_{\text{H,H}}$  = 1.8 Hz, 2H) ppm.

$^{13}\text{C NMR}$  (151 MHz, Acetone- $d_6$ , 25 °C):  $\delta$  = 159.8, 156.8, 152.0, 151.6, 143.3, 137.3, 133.2, 131.0, 130.4, 129.5, 129.3, 125.6, 125.5, 121.0, 81.5, 77.7 ppm.

**HRMS (ESI-ToF):** calc. for  $[\text{C}_{62}\text{H}_{34}\text{N}_6\text{Ru}]^{2+}$  482.0954; found 482.0947.

**<sup>1</sup>H-, <sup>13</sup>C-NMR (CDCl<sub>3</sub>, 400/101 MHz, 22 °C) and HR-ESI spectra of L2:**

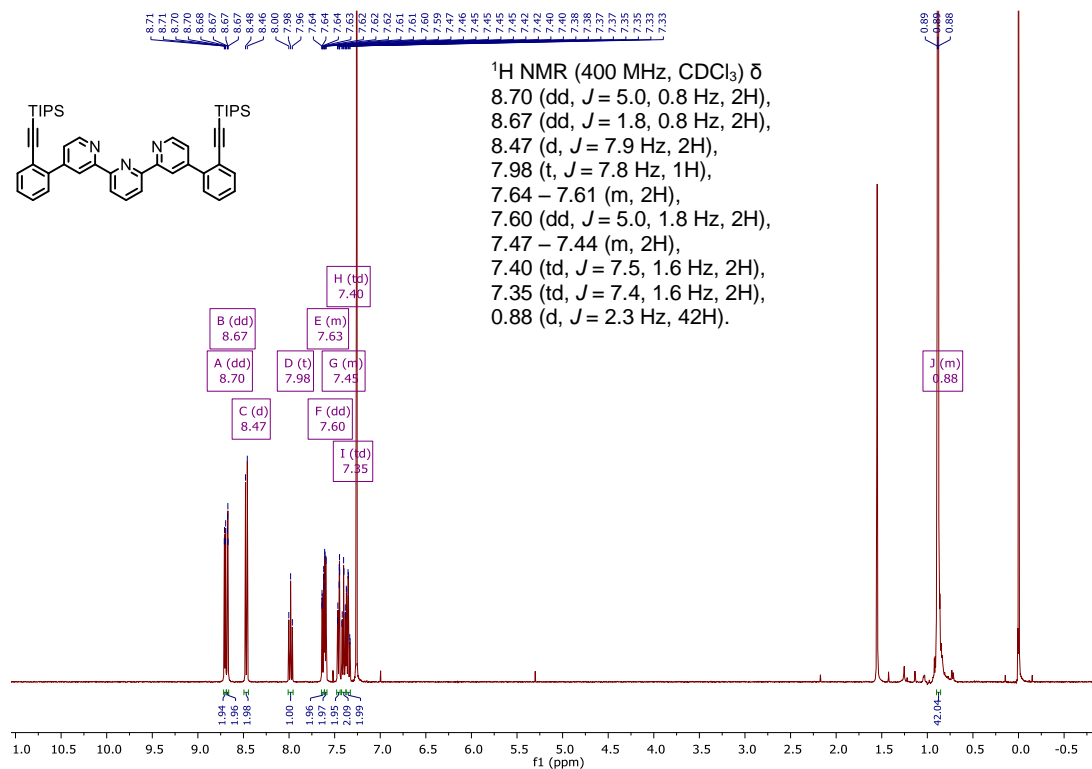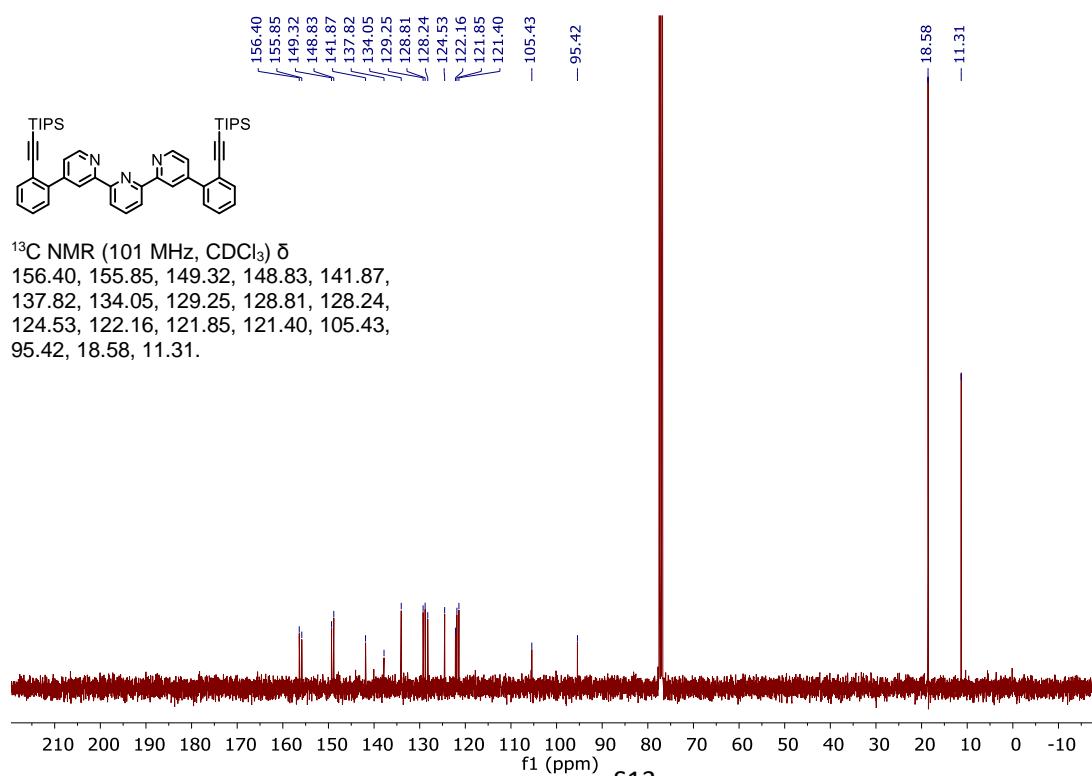

# Mass Spectrum SmartFormula Report

**Analysis Info**

Analysis Name N:\new acq data\VH306 ac Probe 4 001.d  
 Method hn Direct\_Infusion\_pos mode\_75-1700 mid 4eV.m  
 Sample Name Viktor Hoffmann, VH306 ac Probe 4  
 Comment VH 306, ca. 10 ug/ml MeOH

Acquisition Date 16.10.2014 12:05:24  
 Operator hn  
 Instrument / Ser# maXis 4G 21243

**Acquisition Parameter**

|             |            |                       |           |                            |           |
|-------------|------------|-----------------------|-----------|----------------------------|-----------|
| Source Type | ESI        | Ion Polarity          | Positive  | Set Nebulizer              | 0.4 Bar   |
| Focus       | Not active | Set Capillary         | 3600 V    | Set Dry Heater             | 180 °C    |
| Scan Begin  | 75 m/z     | Set End Plate Offset  | -500 V    | Set Dry Gas                | 4.0 l/min |
| Scan End    | 1700 m/z   | Set Collision Cell RF | 500.0 Vpp | Set Ion Energy ( MS only ) | 4.0 eV    |

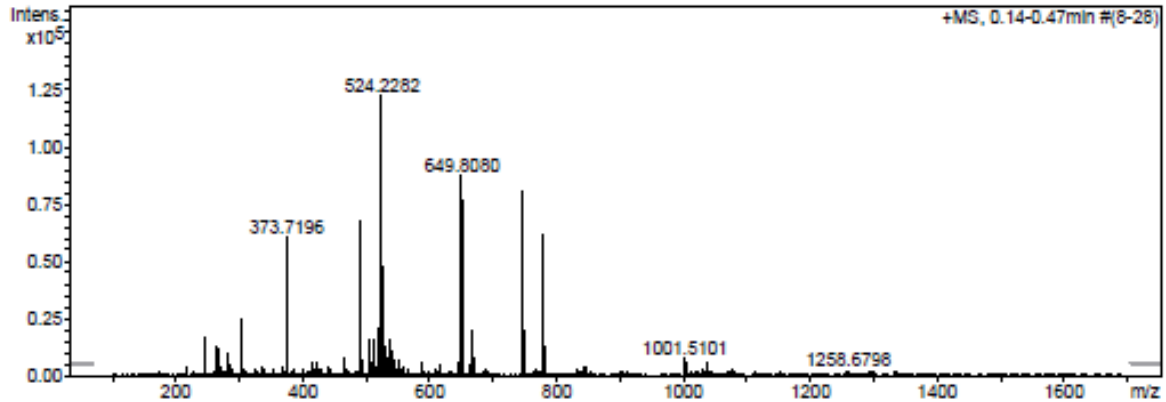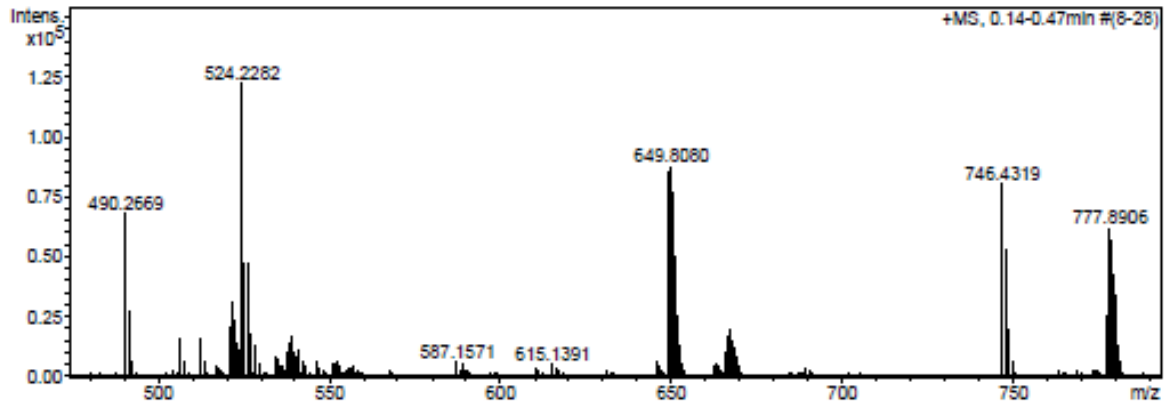

| Meas. m/z | # | Formula                                                        | Score  | m/z      | err [mDa] | err [ppm] | mSigma | rdB  | e <sup>-</sup> Conf | N-Rule | z  |
|-----------|---|----------------------------------------------------------------|--------|----------|-----------|-----------|--------|------|---------------------|--------|----|
| 524.2282  | 1 | C <sub>32</sub> H <sub>35</sub> ClN <sub>3</sub> SI            | 100.00 | 524.2283 | 0.2       | 0.3       | 25.0   | 17.5 | even                | ok     | 1+ |
| 746.4319  | 1 | C <sub>49</sub> H <sub>60</sub> N <sub>3</sub> SI <sub>2</sub> | 100.00 | 746.4320 | 0.1       | 0.1       | 14.0   | 23.5 | even                | ok     |    |

**$^1\text{H}$ -,  $^{13}\text{C}$ -NMR ( $\text{CDCl}_3$ , 600/151 MHz, 25 °C) and HR-ESI spectra of L1:**

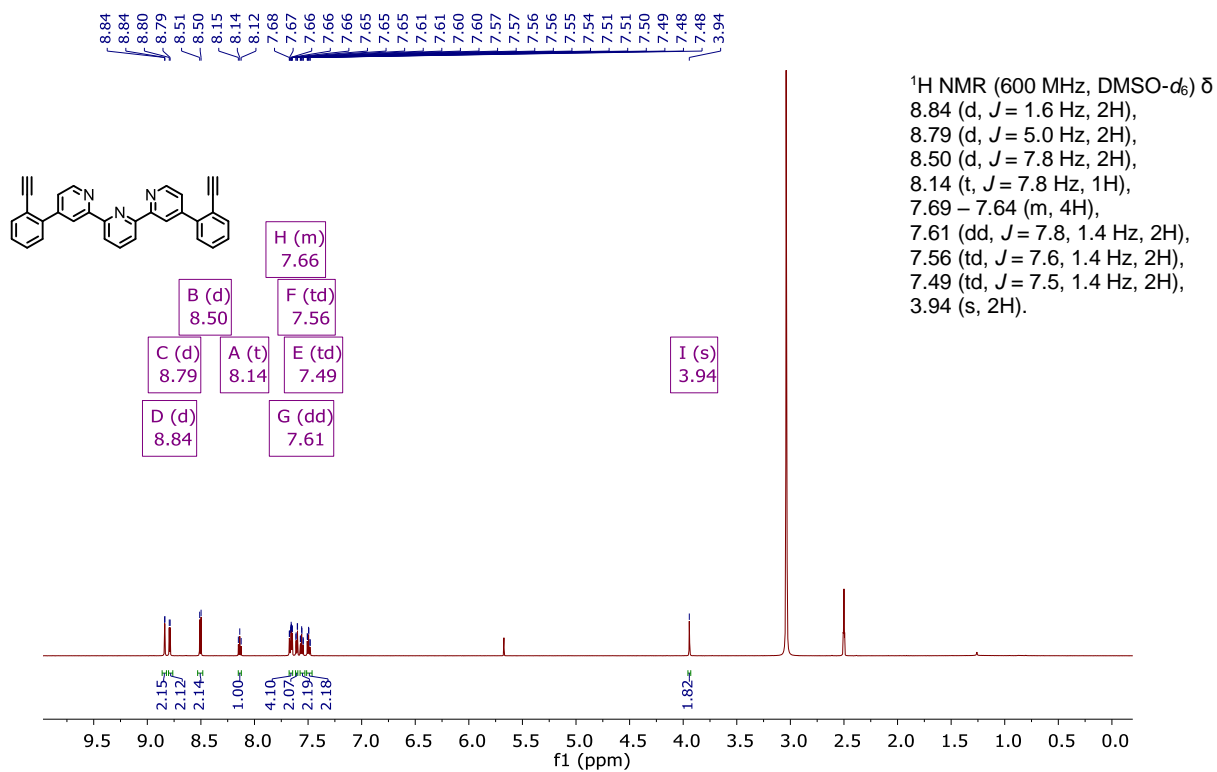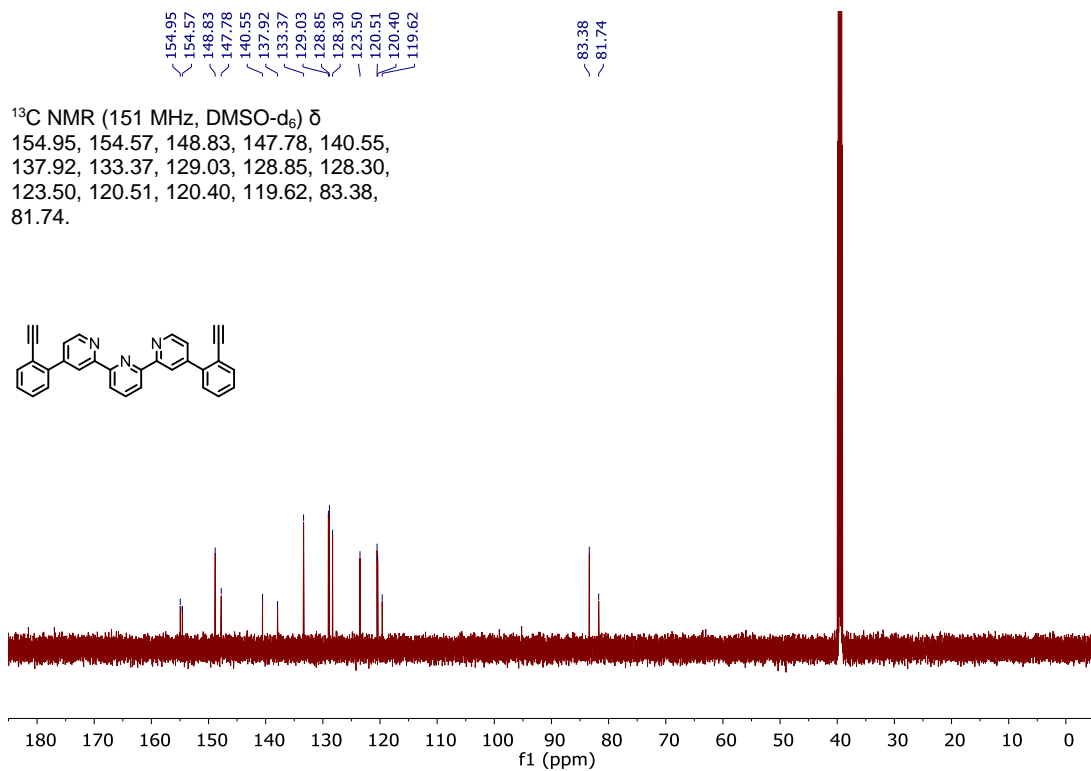

# Mass Spectrum SmartFormula Report

**Analysis Info**

Analysis Name N:\new acq data\VH314 cr 001.d  
 Method hn Direct\_Infusion\_pos mode\_75-1700 mid 4eV.m  
 Sample Name Viktor Hoffmann, VH314 cr  
 Comment VH 314 cr, ca. 10 ug/ml MeCN

Acquisition Date 16.10.2014 14:19:35  
 Operator hn  
 Instrument / Ser# maXis 4G 21243

**Acquisition Parameter**

|             |            |                       |           |                            |           |
|-------------|------------|-----------------------|-----------|----------------------------|-----------|
| Source Type | ESI        | Ion Polarity          | Positive  | Set Nebulizer              | 0.4 Bar   |
| Focus       | Not active | Set Capillary         | 3600 V    | Set Dry Heater             | 180 °C    |
| Scan Begin  | 75 m/z     | Set End Plate Offset  | -500 V    | Set Dry Gas                | 4.0 l/min |
| Scan End    | 1700 m/z   | Set Collision Cell RF | 500.0 Vpp | Set Ion Energy ( MS only ) | 4.0 eV    |

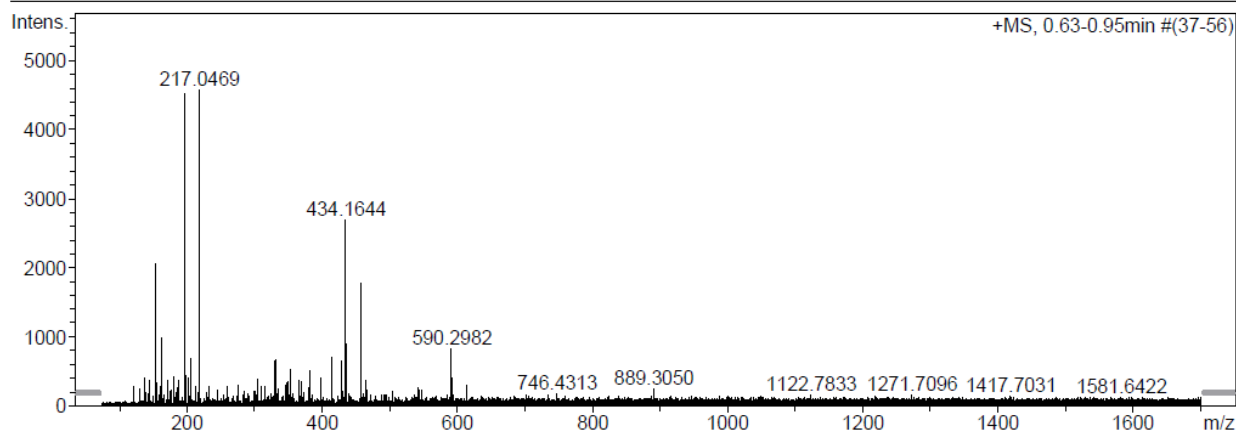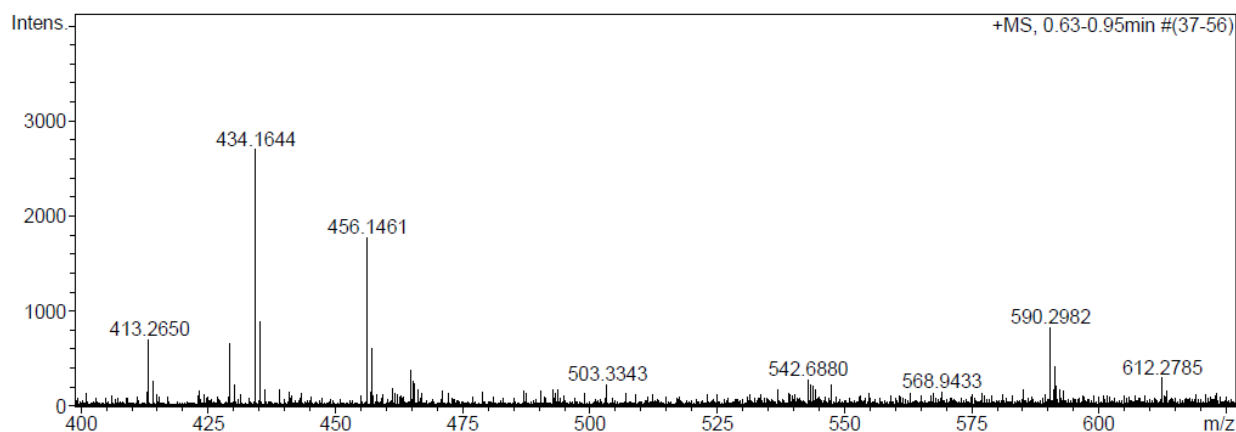

| Meas. m/z | # | Formula          | Score  | m/z      | err [mDa] | err [ppm] | mSigma | rdb  | e <sup>-</sup> Conf | N-Rule | z  |
|-----------|---|------------------|--------|----------|-----------|-----------|--------|------|---------------------|--------|----|
| 434.1644  | 1 | C 31 H 20 N 3    | 100.00 | 434.1652 | 0.7       | 1.7       | 9.9    | 23.5 | even                | ok     | 1+ |
| 590.2982  | 1 | C 40 H 40 N 3 Si | 100.00 | 590.2986 | 0.4       | 0.6       | 32.0   | 23.5 | even                | ok     |    |



**$^1\text{H}$ -,  $^{13}\text{C}$ -NMR ( $\text{CDCl}_3$ , 600/151 MHz, 25 °C) and HR-ESI spectra of  $\text{Fe}(\text{L1})_2$ :**

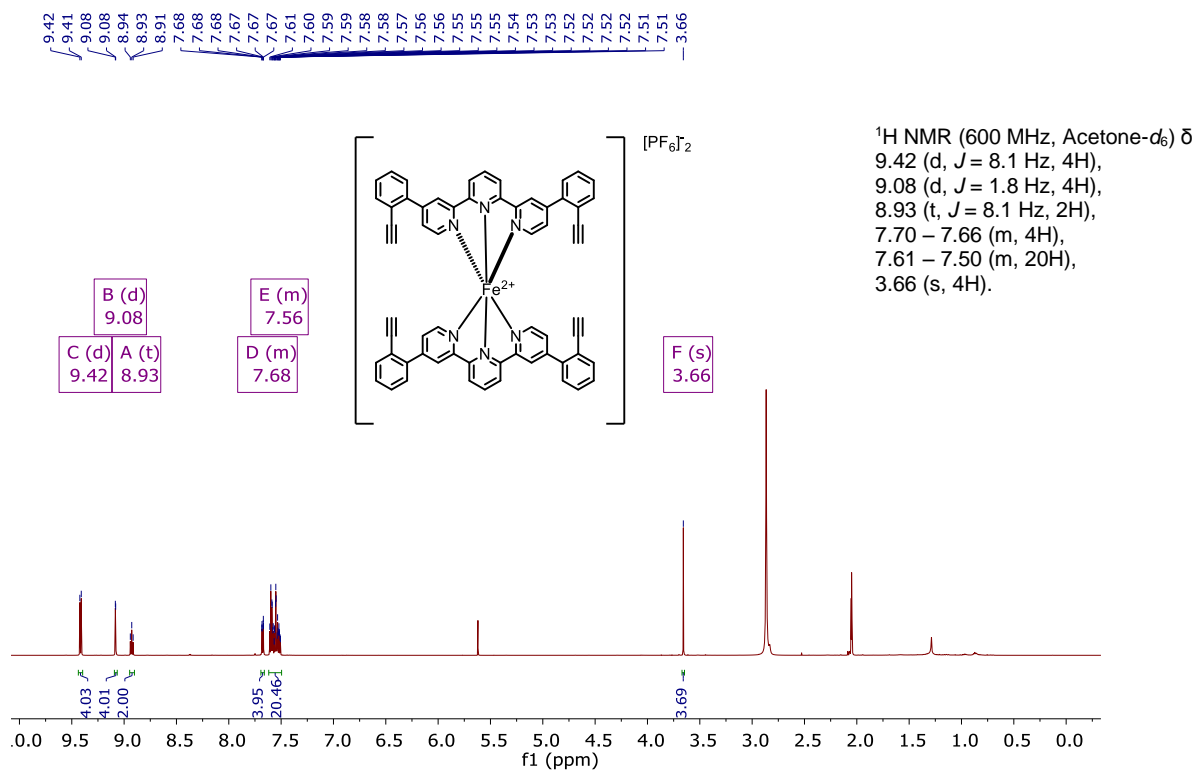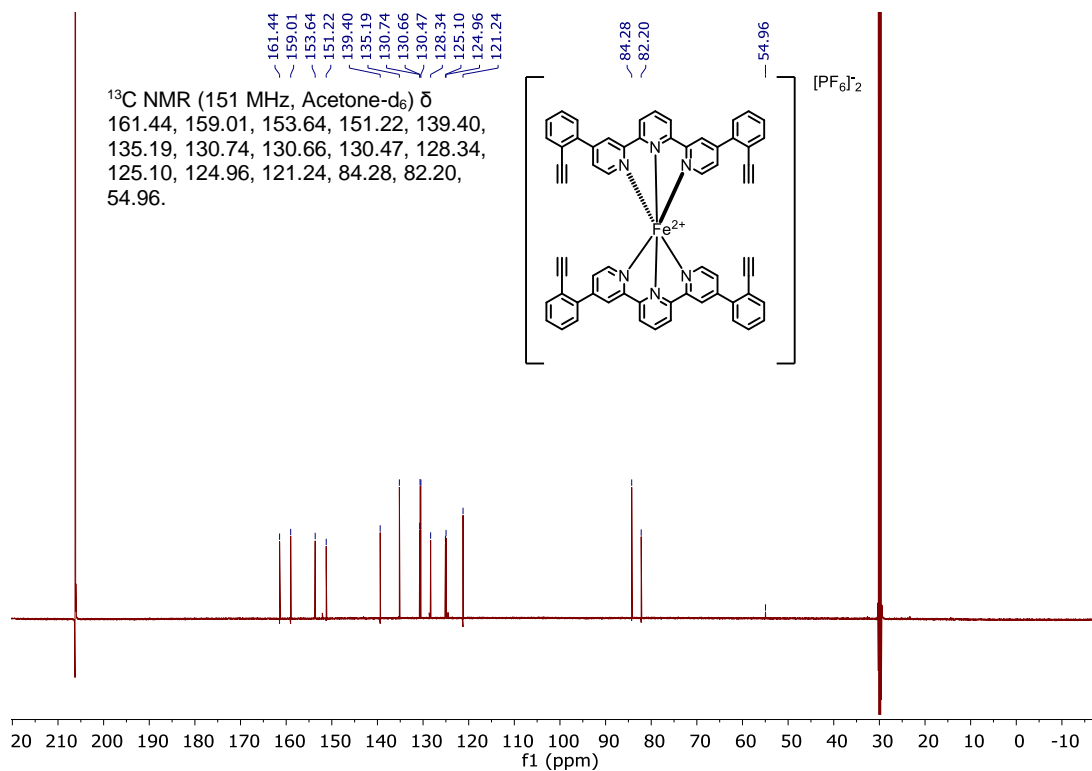

# Mass Spectrum SmartFormula Report

**Analysis Info**

Analysis Name N:\new acq data\VH-323 003.d  
 Method hn Direct\_Infusion\_pos mode\_75-1700 mid 4eV.m  
 Sample Name Viktor Hoffmann, VH-323  
 Comment VH-323, ca. 10 ug/ml MeOH

Acquisition Date 23.10.2014 15:49:29

Operator hn  
 Instrument / Ser# maXis 4G 21243

**Acquisition Parameter**

|             |            |                       |           |                            |           |
|-------------|------------|-----------------------|-----------|----------------------------|-----------|
| Source Type | ESI        | Ion Polarity          | Positive  | Set Nebulizer              | 0.4 Bar   |
| Focus       | Not active | Set Capillary         | 3600 V    | Set Dry Heater             | 180 °C    |
| Scan Begin  | 75 m/z     | Set End Plate Offset  | -500 V    | Set Dry Gas                | 4.0 l/min |
| Scan End    | 1700 m/z   | Set Collision Cell RF | 500.0 Vpp | Set Ion Energy ( MS only ) | 4.0 eV    |

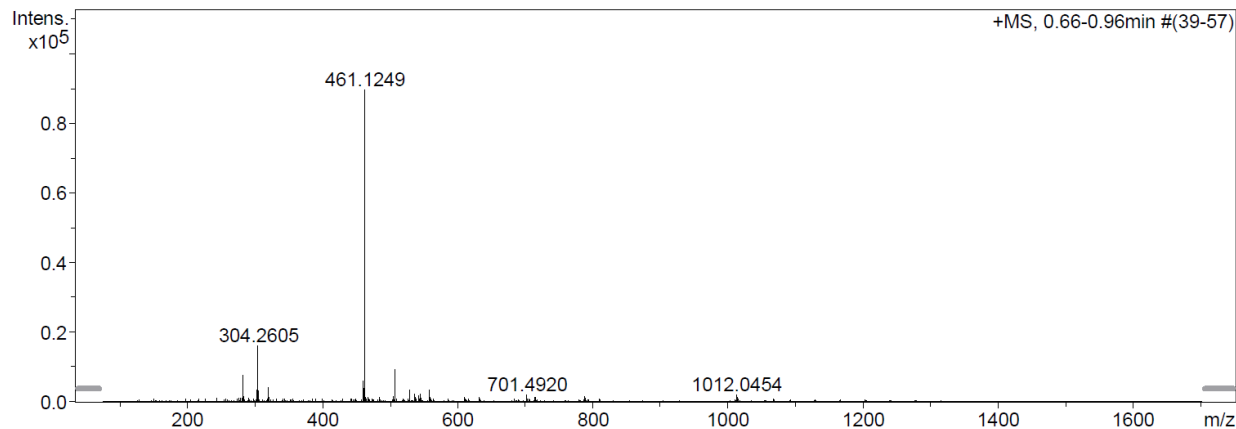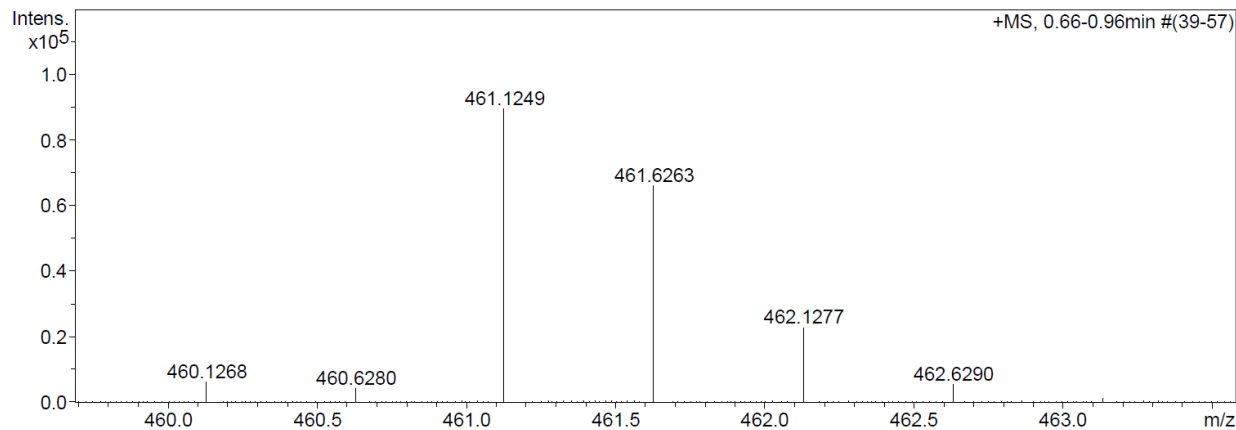

| Meas. m/z | # | Formula          | Score  | m/z      | err [mDa] | err [ppm] | mSigma | rdb  | e <sup>-</sup> Conf | N-Rule | z  |
|-----------|---|------------------|--------|----------|-----------|-----------|--------|------|---------------------|--------|----|
| 461.1249  | 1 | C 62 H 38 Fe N 6 | 100.00 | 461.1249 | -0.0      | -0.1      | 9.6    | 47.0 | even                | ok     | 2+ |

**$^1\text{H}$ -,  $^{13}\text{C}$ -NMR, COSY, NOESY, HMBC, HMQC ( $\text{CDCl}_3$ , 600/101/150 MHz, 25 °C) and HR-ESI spectra of  $\text{Fe}(\text{L}1)_2\text{-c}$  with full assignment:**

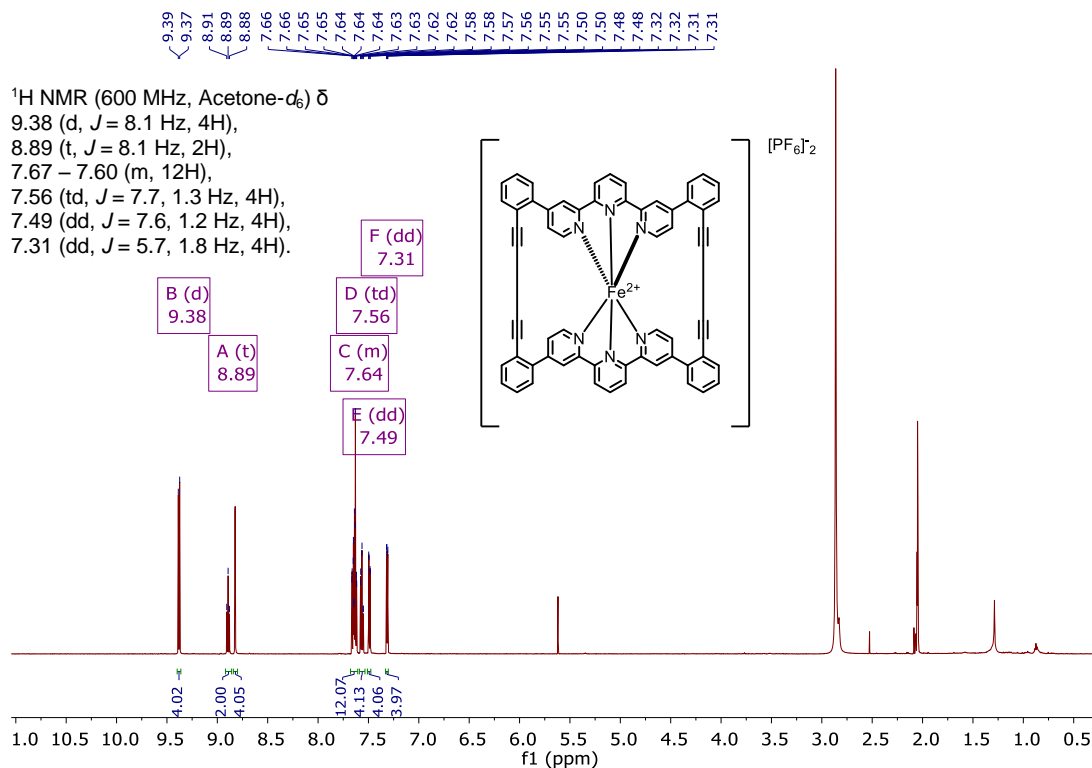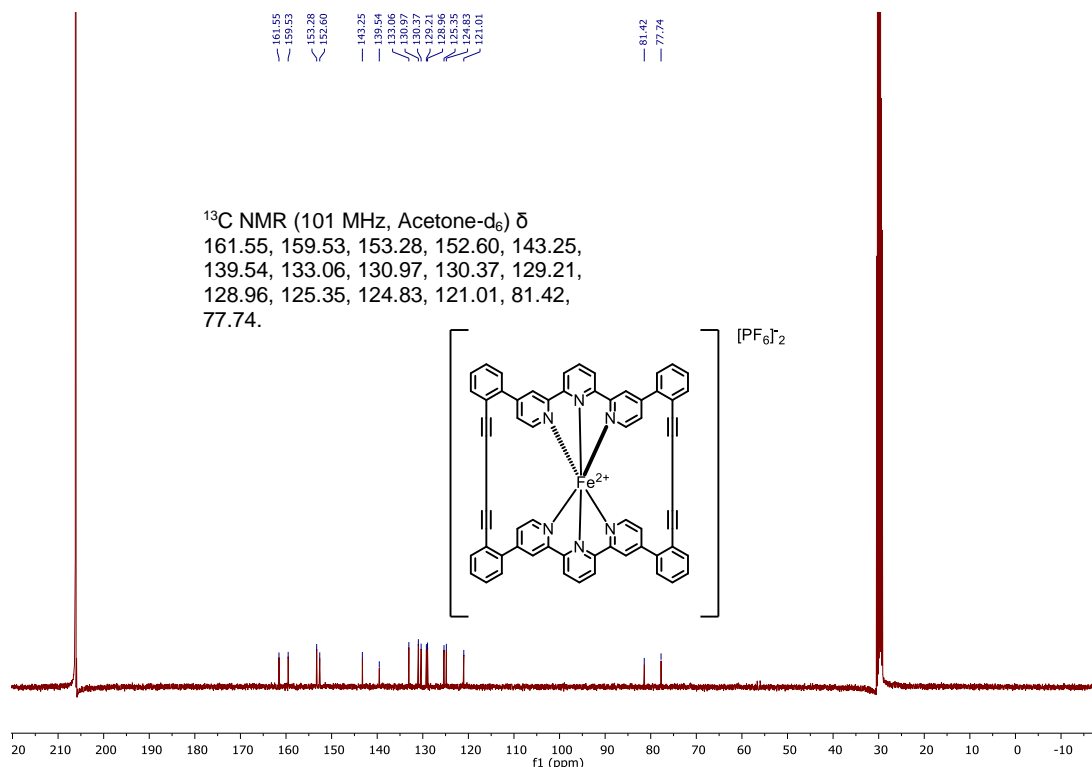

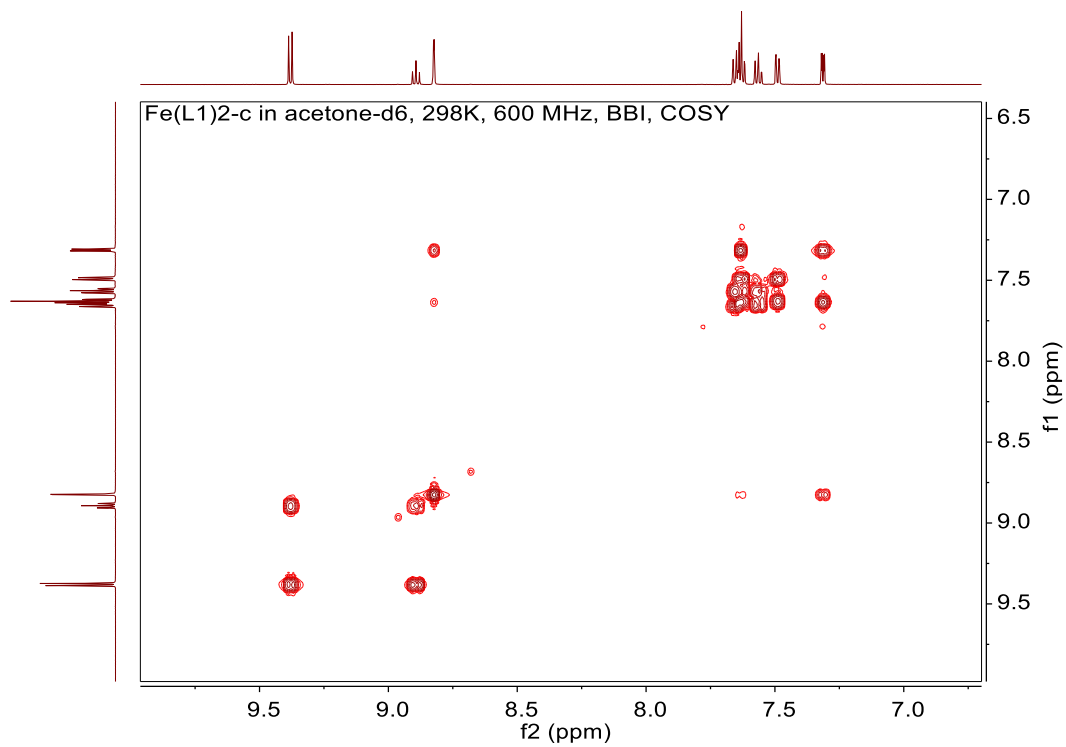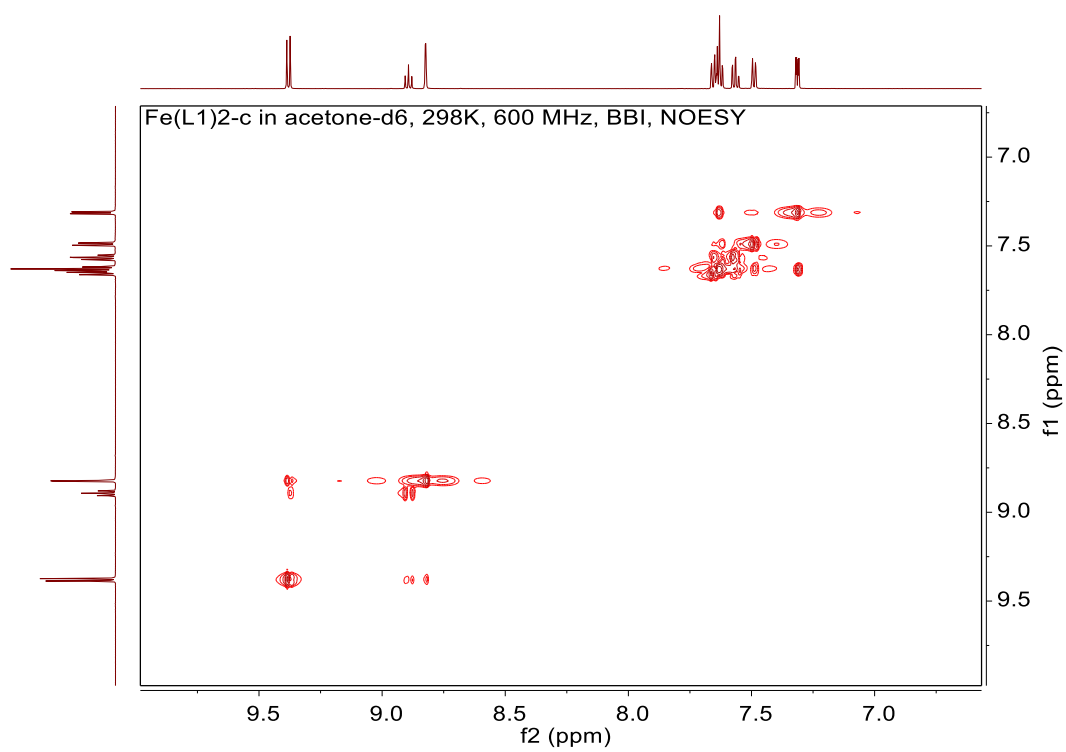

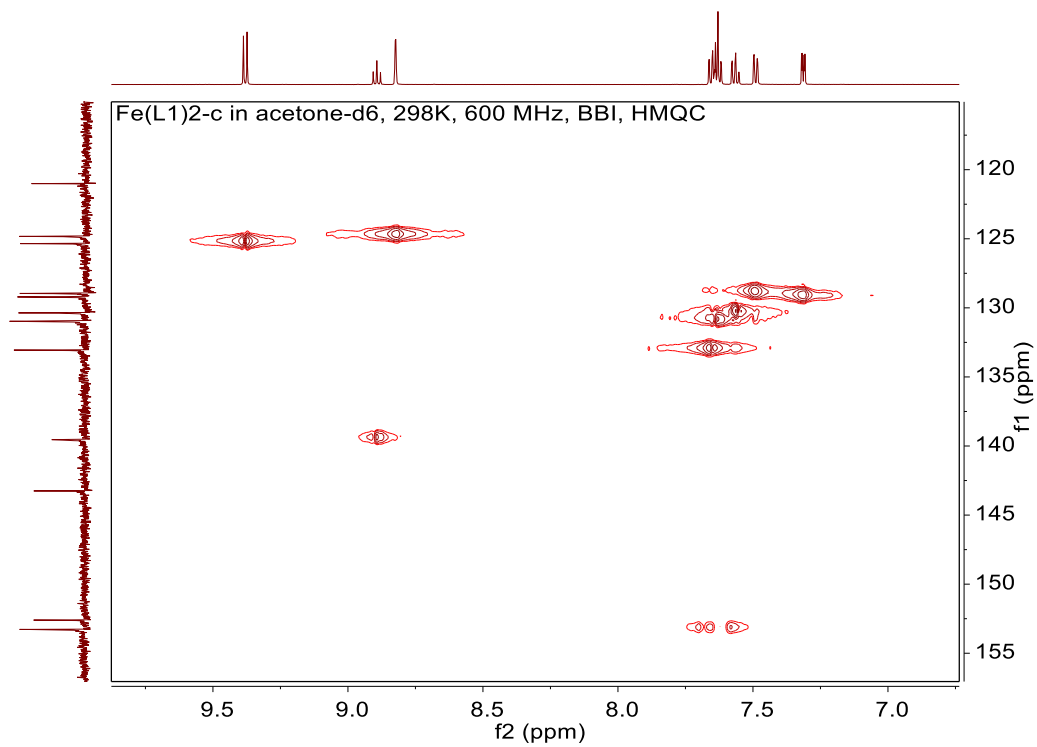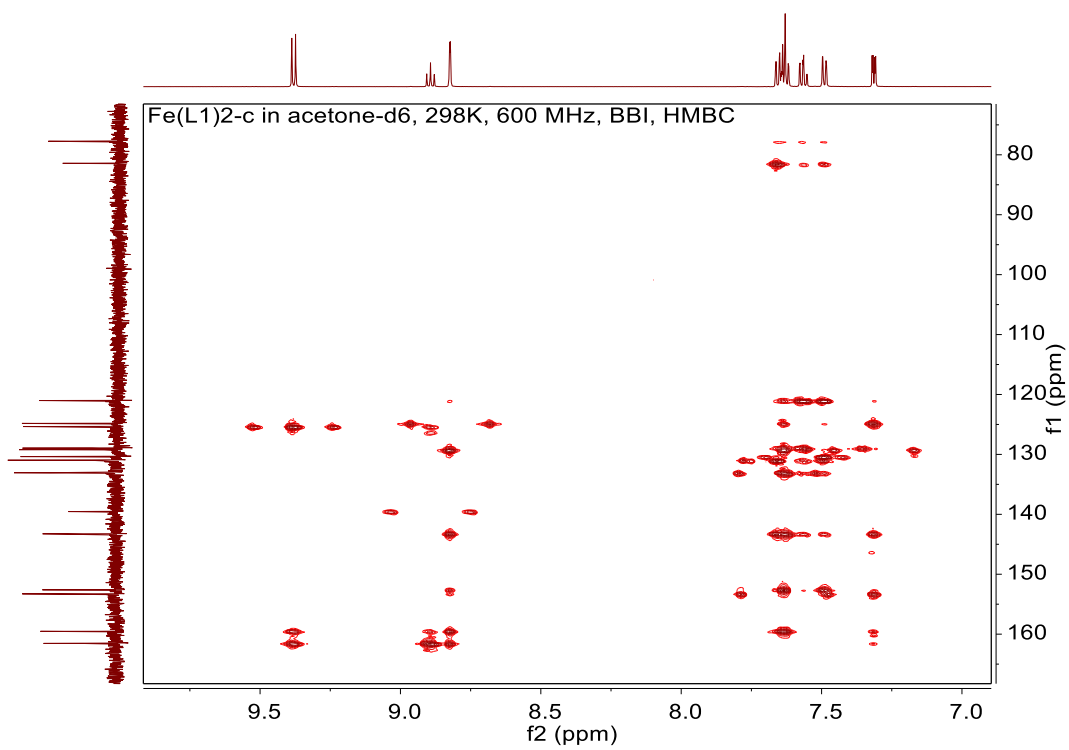

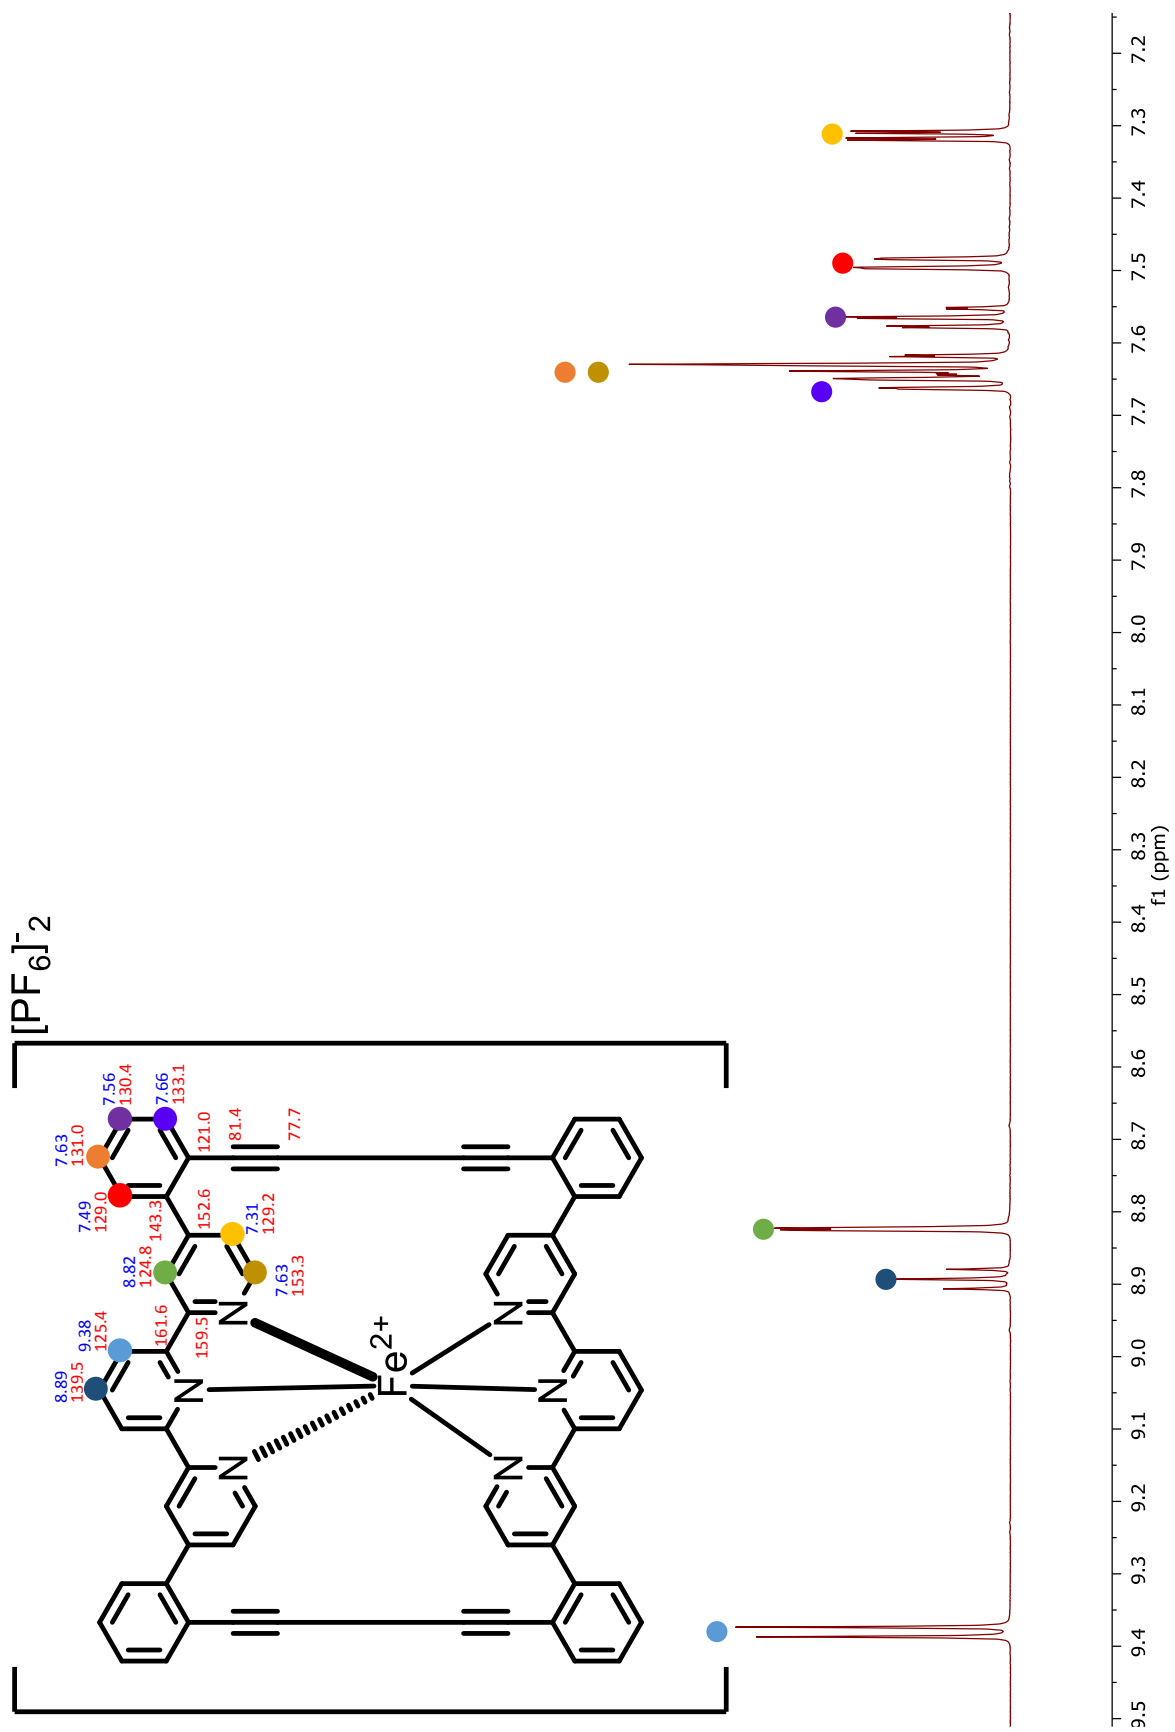

# Mass Spectrum SmartFormula Report

**Analysis Info**

Analysis Name N:\new acq data\VH326 001.d  
 Method hn Direct\_Infusion\_pos mode\_75-1700 mid 4eV.m  
 Sample Name Viktor Hoffmann, VH326  
 Comment VH326, ca 10 ug/ml MeOH

Acquisition Date 24.10.2014 18:15:19

Operator hn  
 Instrument / Ser# maXis 4G 21243

**Acquisition Parameter**

|             |            |                       |           |                            |           |
|-------------|------------|-----------------------|-----------|----------------------------|-----------|
| Source Type | ESI        | Ion Polarity          | Positive  | Set Nebulizer              | 0.4 Bar   |
| Focus       | Not active | Set Capillary         | 3600 V    | Set Dry Heater             | 180 °C    |
| Scan Begin  | 75 m/z     | Set End Plate Offset  | -500 V    | Set Dry Gas                | 4.0 l/min |
| Scan End    | 1700 m/z   | Set Collision Cell RF | 500.0 Vpp | Set Ion Energy ( MS only ) | 4.0 eV    |

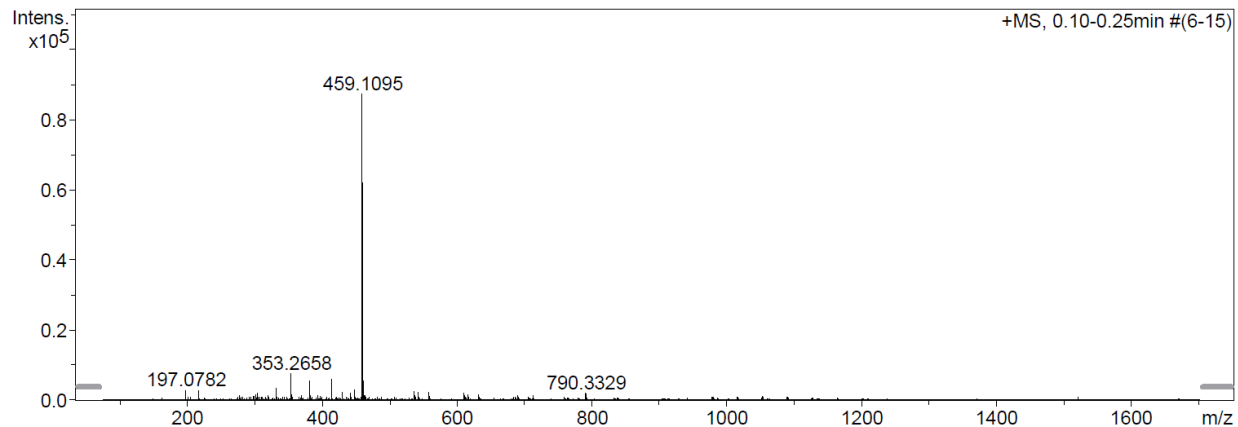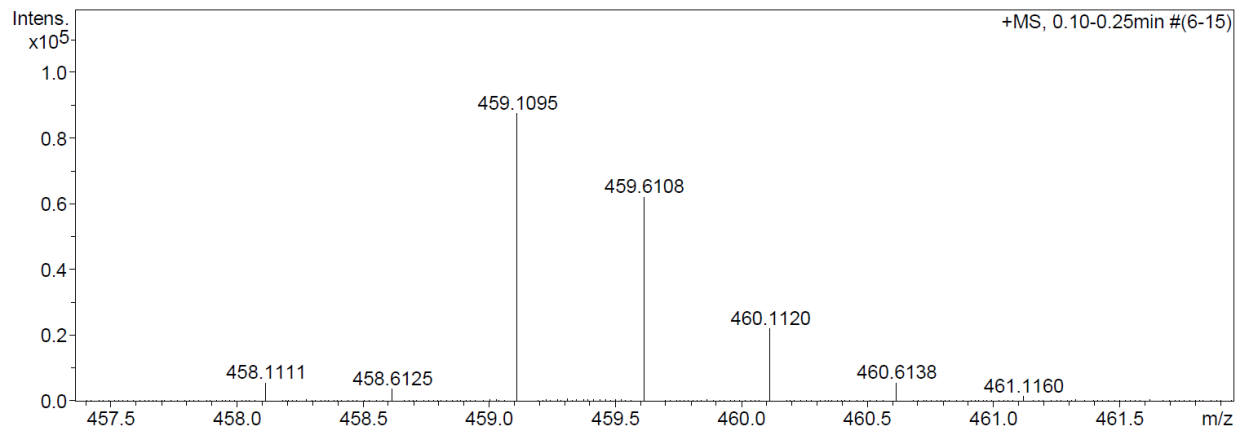

| Meas. m/z | # | Formula          | Score  | m/z      | err [mDa] | err [ppm] | mSigma | rdb  | e <sup>-</sup> Conf | N-Rule | z  |
|-----------|---|------------------|--------|----------|-----------|-----------|--------|------|---------------------|--------|----|
| 459.1095  | 1 | C 62 H 34 Fe N 6 | 100.00 | 459.1092 | -0.2      | -0.5      | 2.5    | 49.0 | even                | ok     | 2+ |

**$^1\text{H}$ -,  $^{13}\text{C}$ -NMR ( $\text{CDCl}_3$ , 400/101 MHz, 22 °C) and HR-ESI spectra of  $\text{Ru}(\text{L}2)_2$ :**

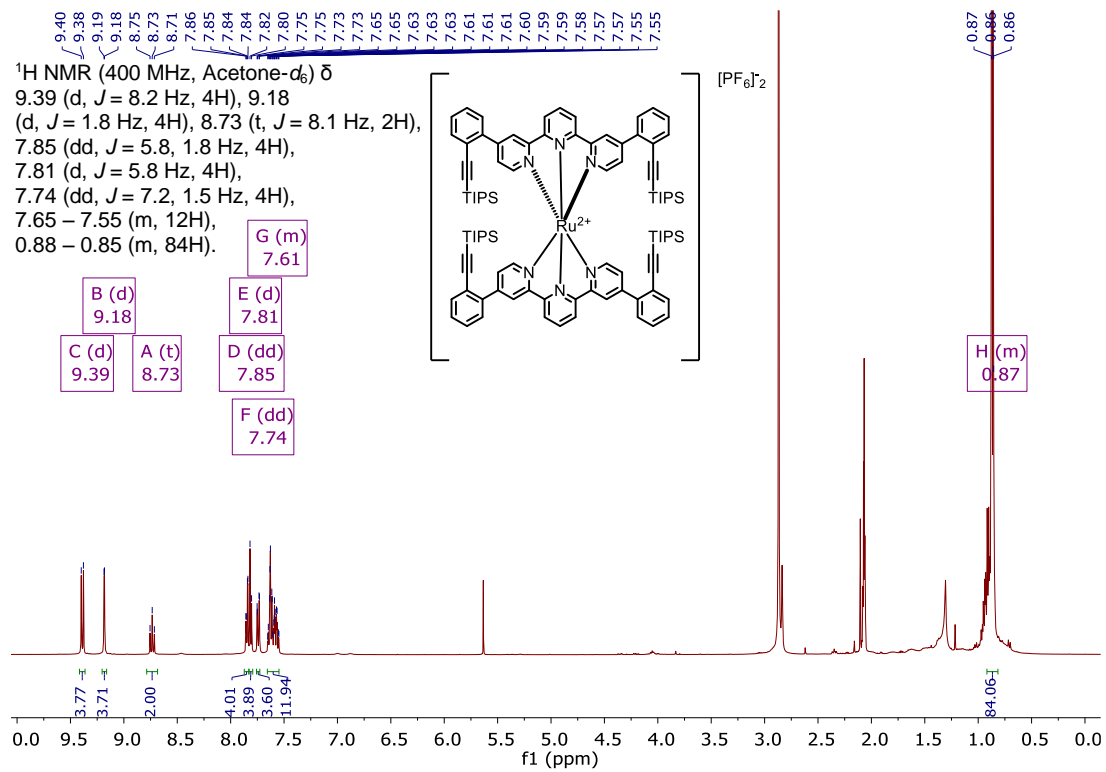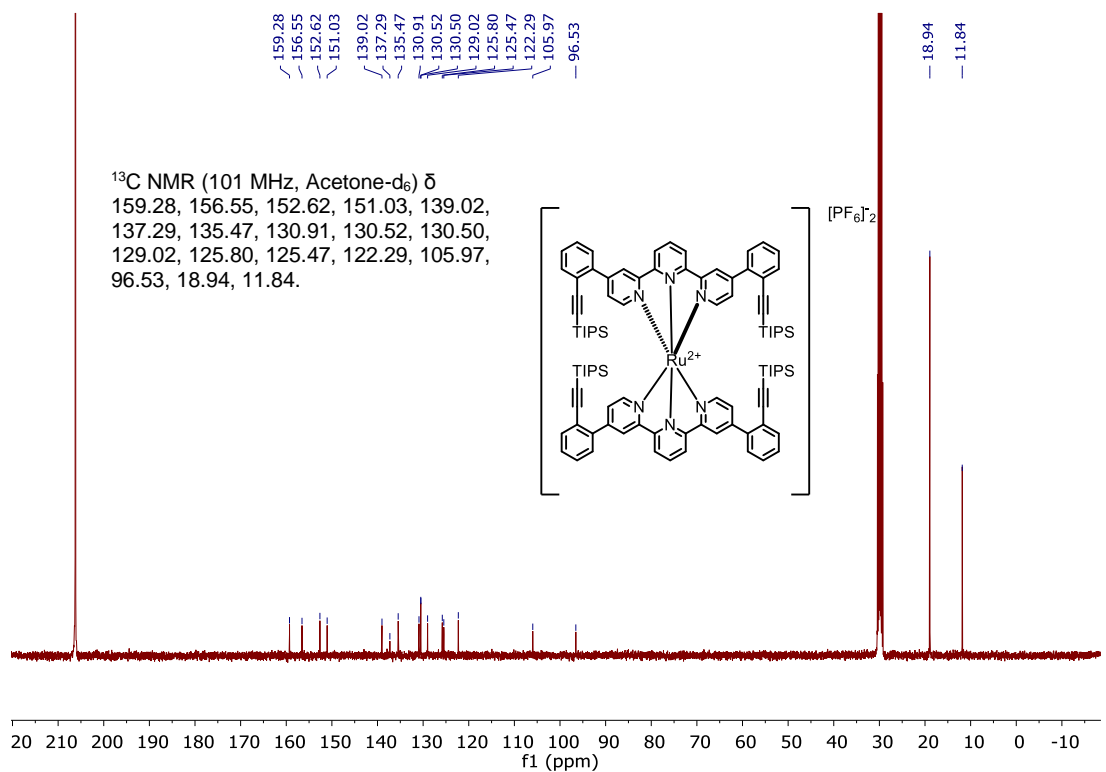



# Mass Spectrum SmartFormula Report

**Analysis Info**

Analysis Name N:\new acq data\BRT132 001.d  
 Method hn Direct\_Infusion\_pos mode\_75-2000 high 4eV.m  
 Sample Name Thomas Brandl, BRT132  
 Comment ca. 20 ug/mL MeCN mit DCM

Acquisition Date 08.12.2015 15:49:07

Operator hn  
 Instrument / Ser# maXis 4G 21243

**Acquisition Parameter**

|             |            |                       |            |                            |           |
|-------------|------------|-----------------------|------------|----------------------------|-----------|
| Source Type | ESI        | Ion Polarity          | Positive   | Set Nebulizer              | 0.4 Bar   |
| Focus       | Not active | Set Capillary         | 3600 V     | Set Dry Heater             | 180 °C    |
| Scan Begin  | 75 m/z     | Set End Plate Offset  | -500 V     | Set Dry Gas                | 4.0 l/min |
| Scan End    | 2000 m/z   | Set Collision Cell RF | 1000.0 Vpp | Set Ion Energy ( MS only ) | 4.0 eV    |

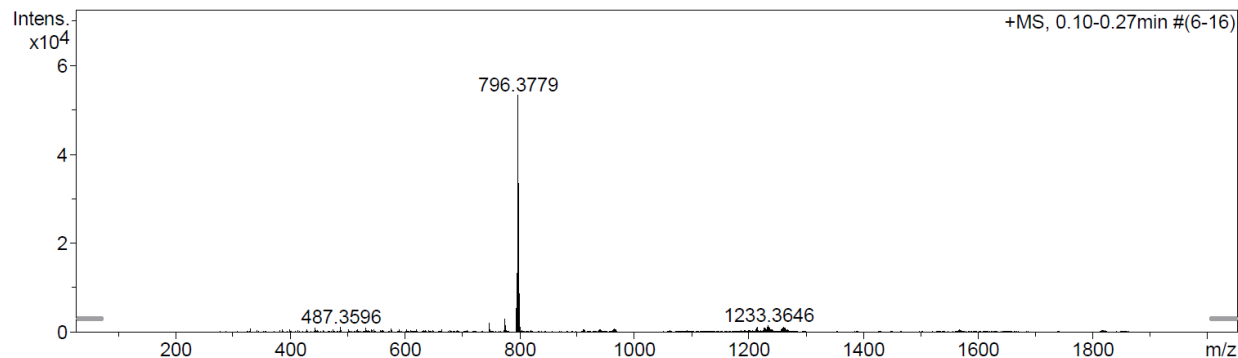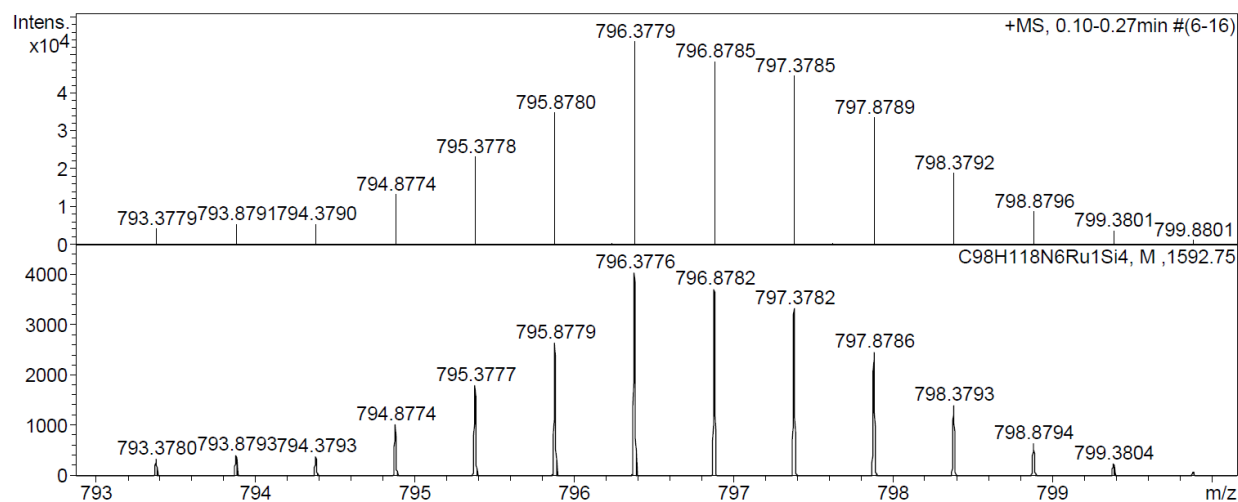

| Meas. m/z | # | Formula                                                           | Score  | m/z      | err [mDa] | err [ppm] | mSigma | rdb  | e <sup>-</sup> Conf | N-Rule | z  |
|-----------|---|-------------------------------------------------------------------|--------|----------|-----------|-----------|--------|------|---------------------|--------|----|
| 796.3779  | 1 | C <sub>98</sub> H <sub>118</sub> N <sub>6</sub> RuSi <sub>4</sub> | 100.00 | 796.3766 | -1.3      | -1.7      | 7.4    | 47.5 | odd                 | -      | 2+ |

# <sup>1</sup>H-, <sup>13</sup>C-NMR (CDCl<sub>3</sub>, 600/151 MHz, 25 °C) and HR-ESI spectra of Ru(L1)<sub>2</sub>:

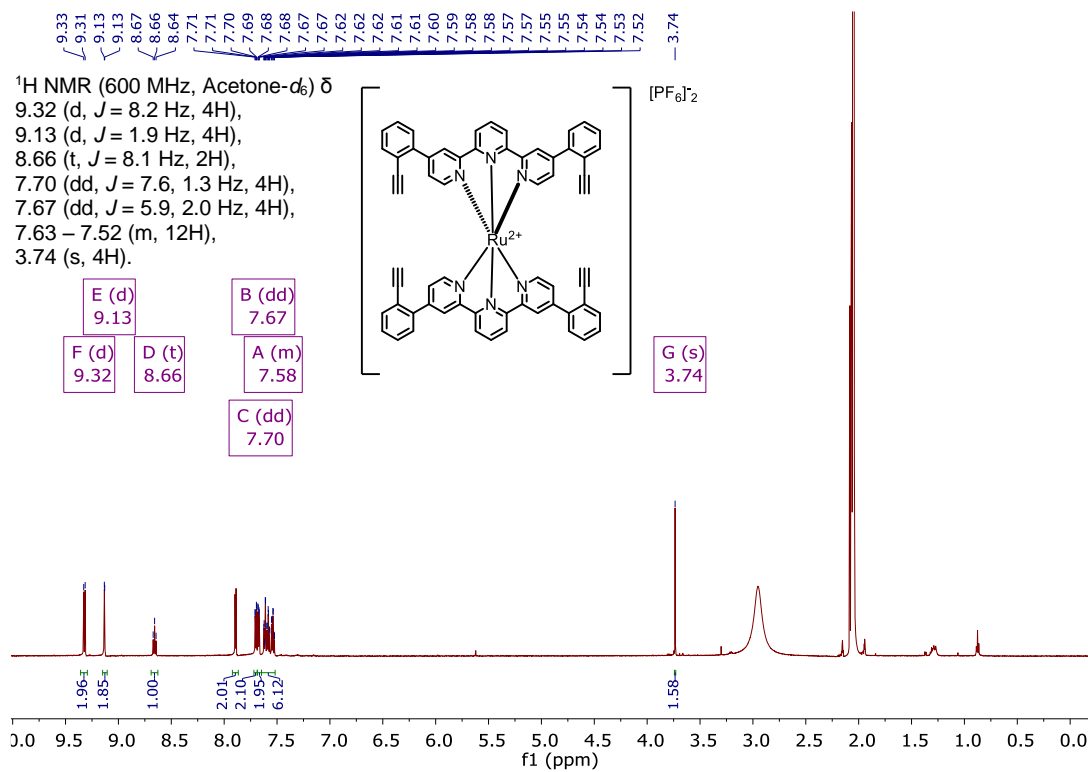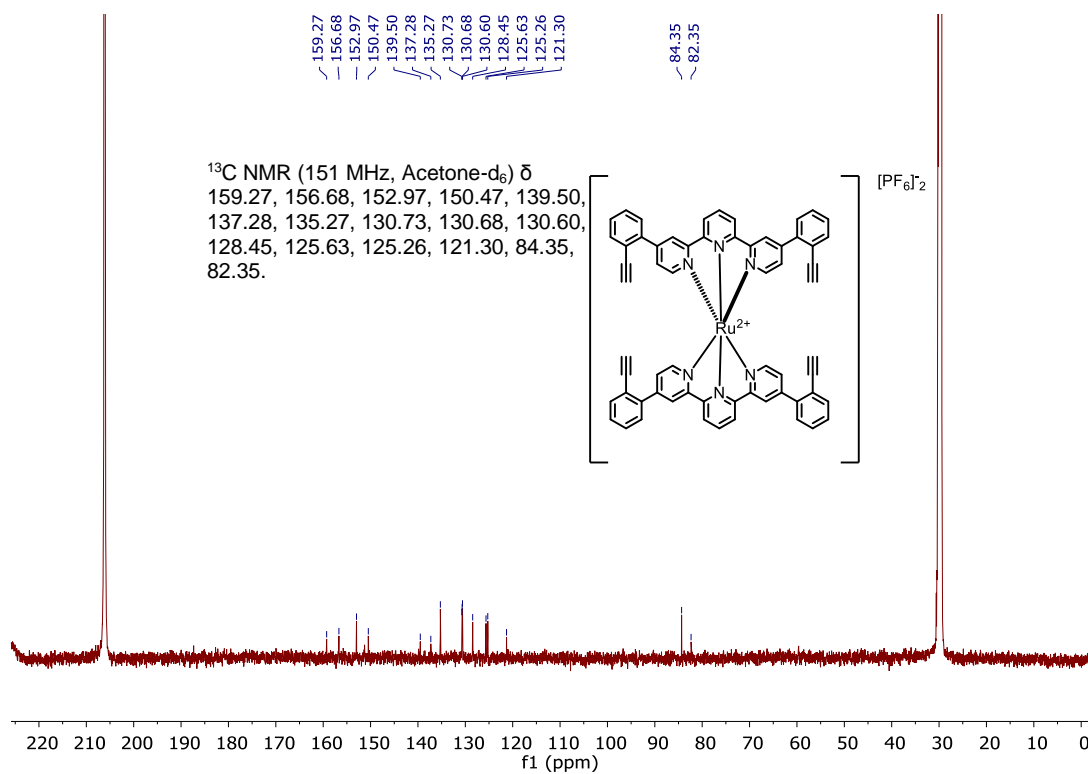

# Mass Spectrum SmartFormula Report

**Analysis Info**

Analysis Name N:\new acq data\BRT119 002.d  
 Method hn Direct\_Infusion\_pos mode\_75-1700 mid 4eV.m  
 Sample Name Thomas Brandl  
 Comment BRT119, ca. 10 ug/ml MeCN, 1:3 verdünnt

Acquisition Date 13.11.2015 15:34:44  
 Operator hn  
 Instrument / Ser# maXis 4G 21243

**Acquisition Parameter**

|             |            |                       |           |                            |           |
|-------------|------------|-----------------------|-----------|----------------------------|-----------|
| Source Type | ESI        | Ion Polarity          | Positive  | Set Nebulizer              | 0.4 Bar   |
| Focus       | Not active | Set Capillary         | 3600 V    | Set Dry Heater             | 180 °C    |
| Scan Begin  | 75 m/z     | Set End Plate Offset  | -500 V    | Set Dry Gas                | 4.0 l/min |
| Scan End    | 1700 m/z   | Set Collision Cell RF | 350.0 Vpp | Set Ion Energy ( MS only ) | 4.0 eV    |

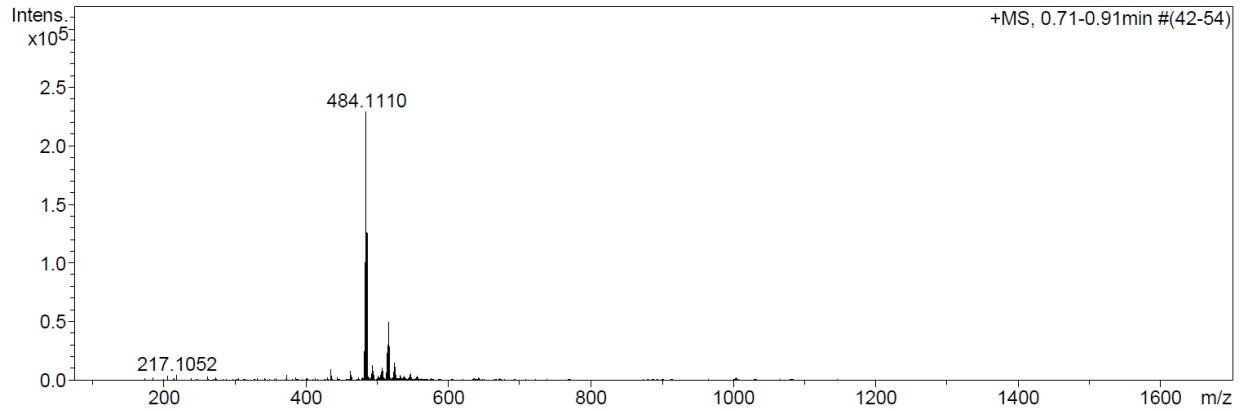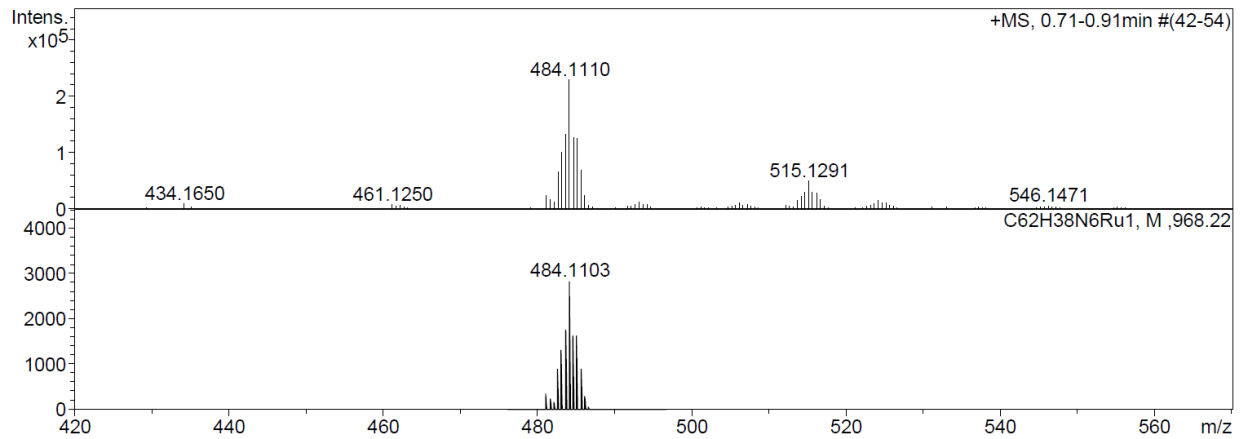

| Meas. m/z | # | Formula              | Score  | m/z      | err [mDa] | err [ppm] | mSigma | rdb  | e <sup>-</sup> Conf | N-Rule | z  |
|-----------|---|----------------------|--------|----------|-----------|-----------|--------|------|---------------------|--------|----|
| 484.1110  | 1 | C 62 H 38 N 6 Ru     | 100.00 | 484.1103 | -0.7      | -1.4      | 18.6   | 47.5 | odd                 | -      | 2+ |
| 515.1291  | 1 | C 64 H 44 N 6 O 2 Ru | 100.00 | 515.1288 | -0.4      | -0.7      | 7.1    | 46.5 | odd                 | -      | -  |

**$^1\text{H}$ -,  $^{13}\text{C}$ -NMR, COSY, NOESY, HMBC, HMQC ( $\text{CDCl}_3$ , 600/151 MHz, 25 °C) and HR-ESI spectra of  $\text{Ru}(\text{L1})_2\text{-c}$  with full assignment:**

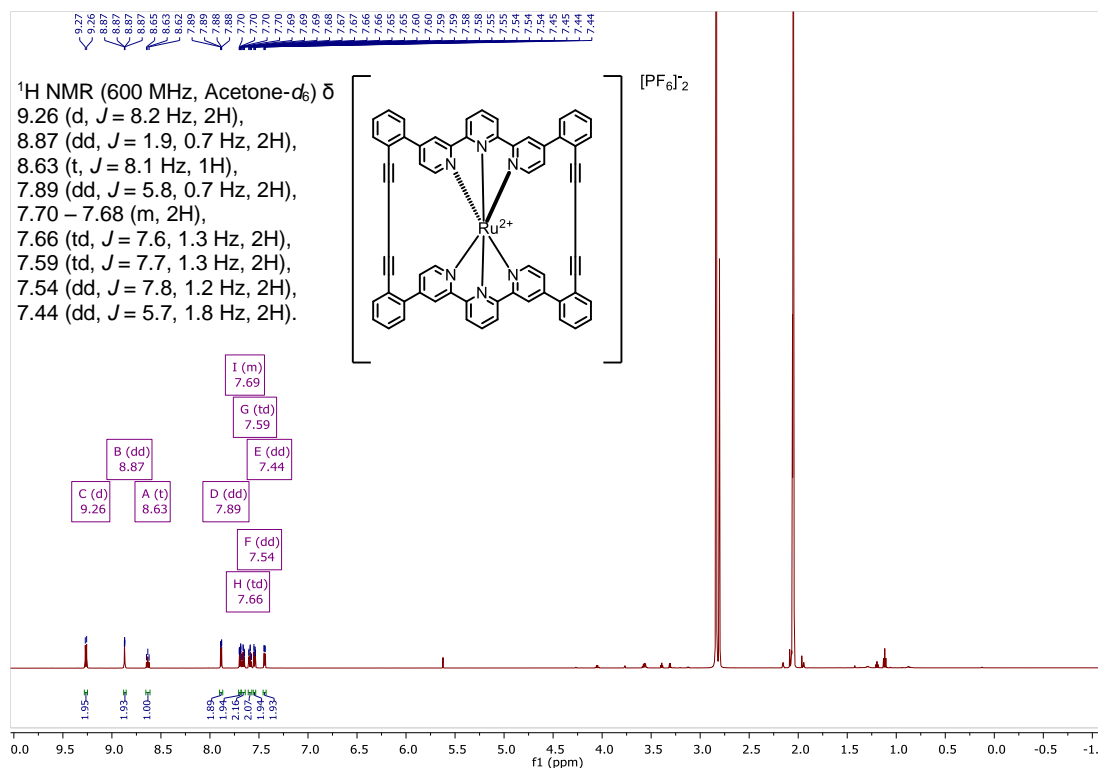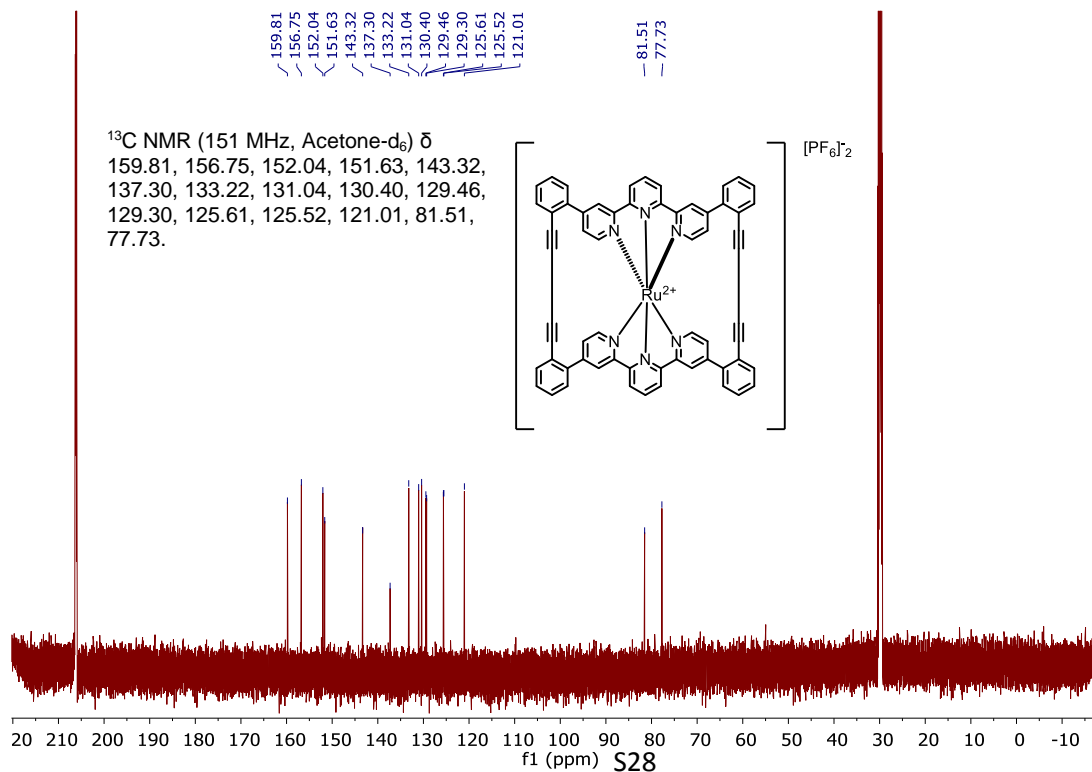

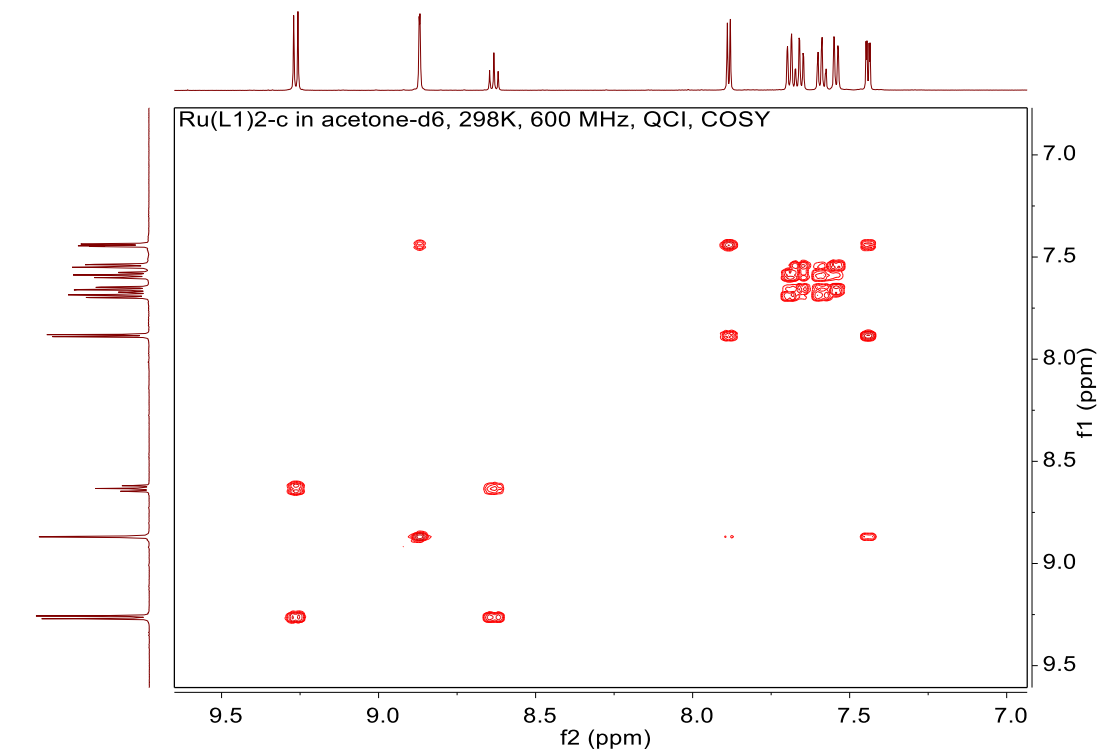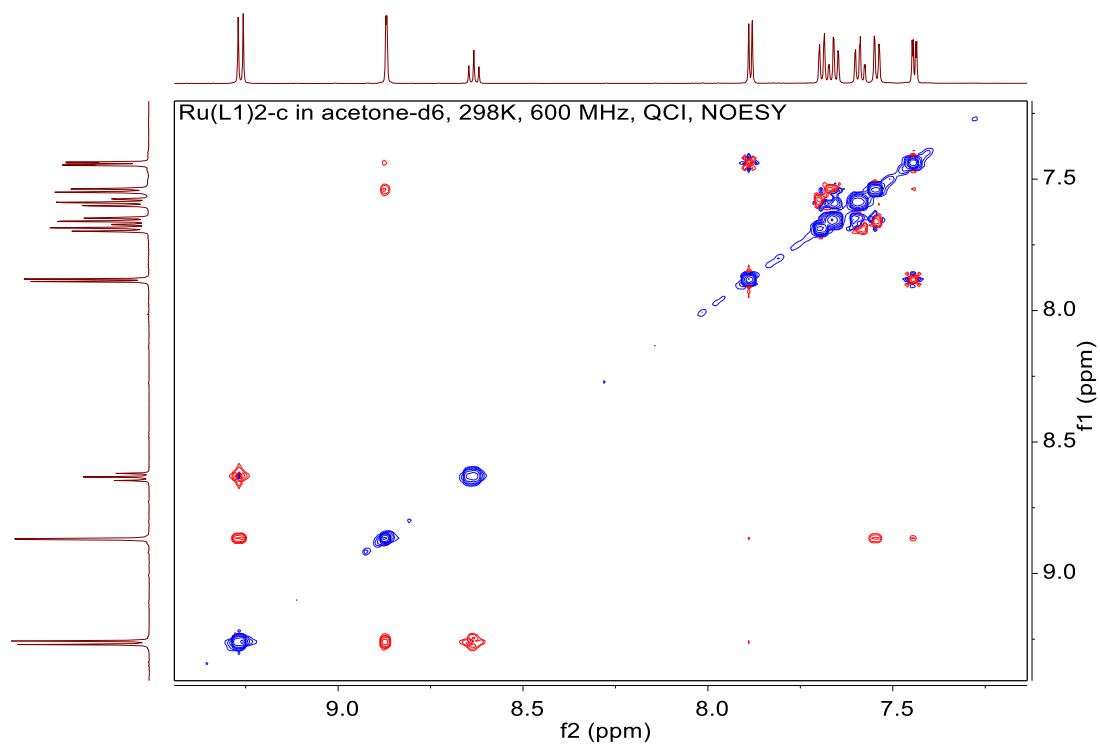

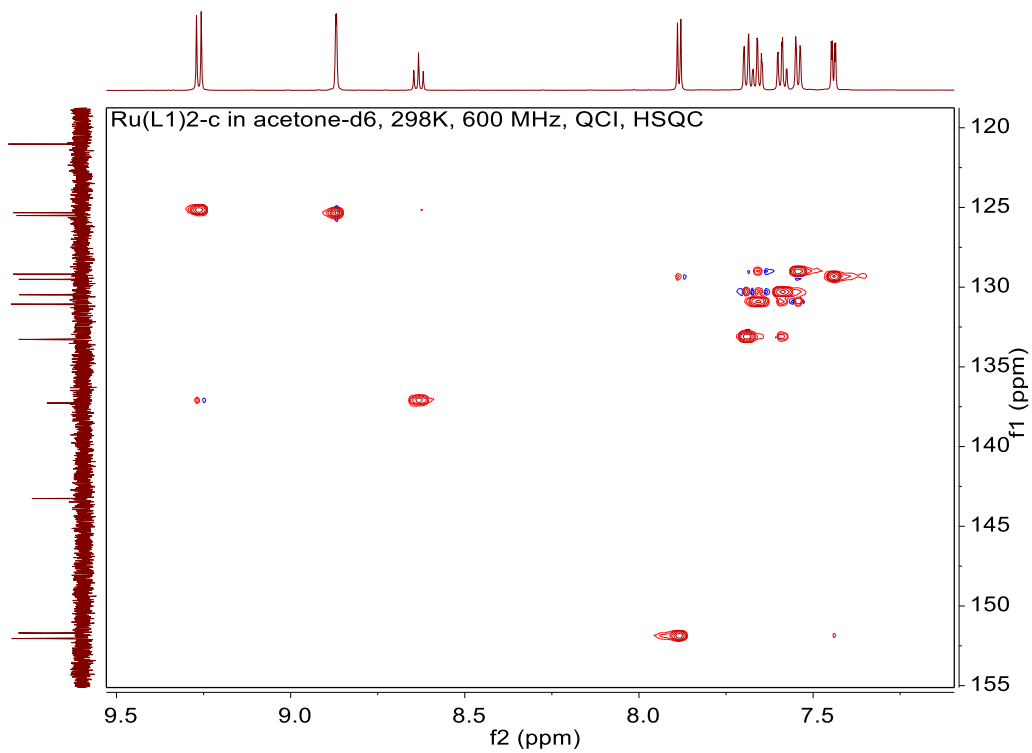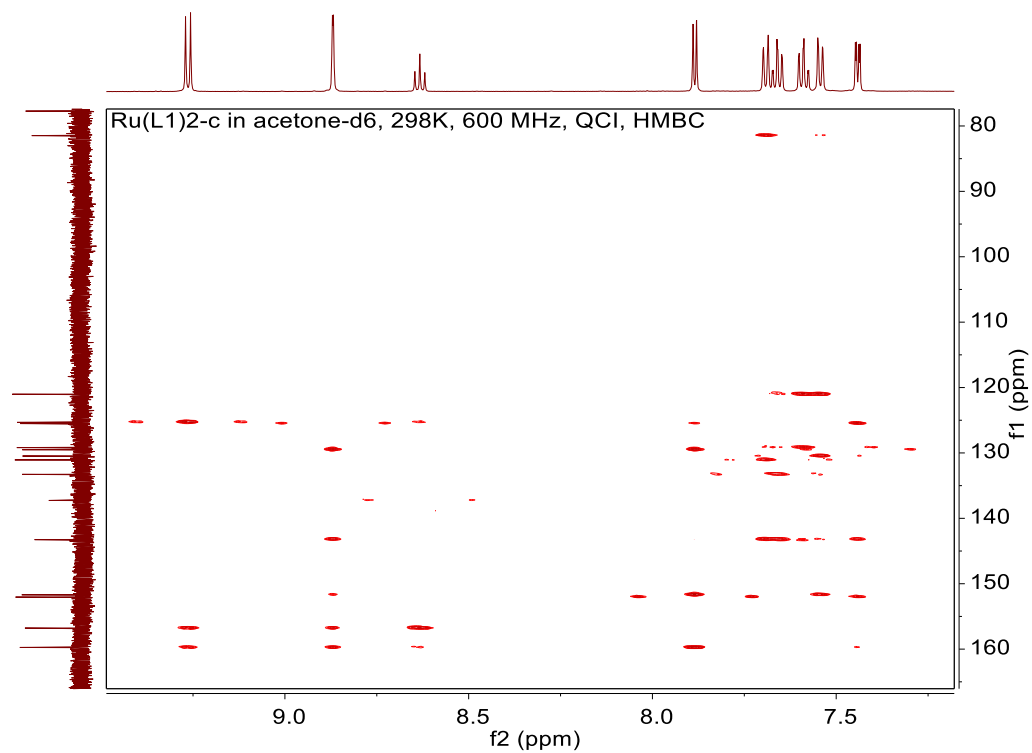



# Mass Spectrum SmartFormula Report

**Analysis Info**

Analysis Name N:\new acq data\BRT129 002.d  
 Method hn Direct\_Infusion\_pos mode\_sensitive Komplex.m  
 Sample Name Thomas Brandl, BRT129  
 Comment ca. 20 ug/mL MeCN + DCM

Acquisition Date 30.11.2015 15:03:29

Operator hn  
 Instrument / Ser# maXis 4G 21243

**Acquisition Parameter**

|             |            |                       |           |                            |           |
|-------------|------------|-----------------------|-----------|----------------------------|-----------|
| Source Type | ESI        | Ion Polarity          | Positive  | Set Nebulizer              | 0.4 Bar   |
| Focus       | Not active | Set Capillary         | 4500 V    | Set Dry Heater             | 180 °C    |
| Scan Begin  | 75 m/z     | Set End Plate Offset  | -500 V    | Set Dry Gas                | 4.0 l/min |
| Scan End    | 1600 m/z   | Set Collision Cell RF | 300.0 Vpp | Set Ion Energy ( MS only ) | 30.0 eV   |

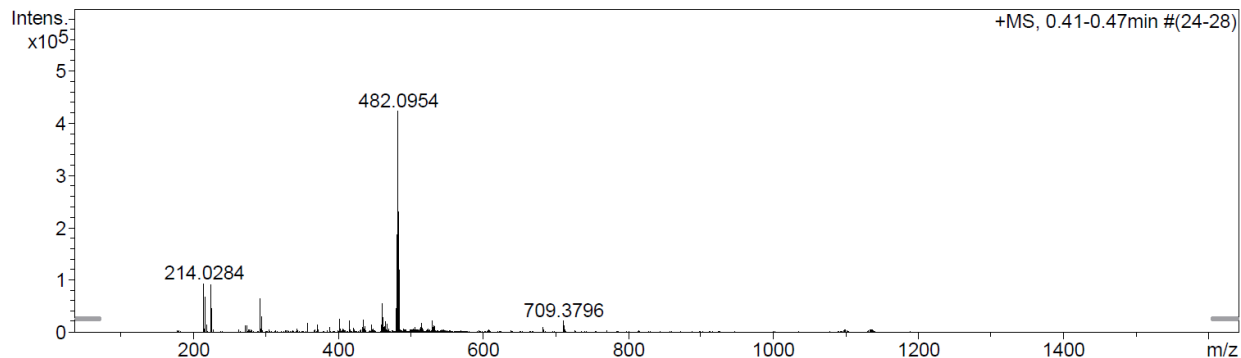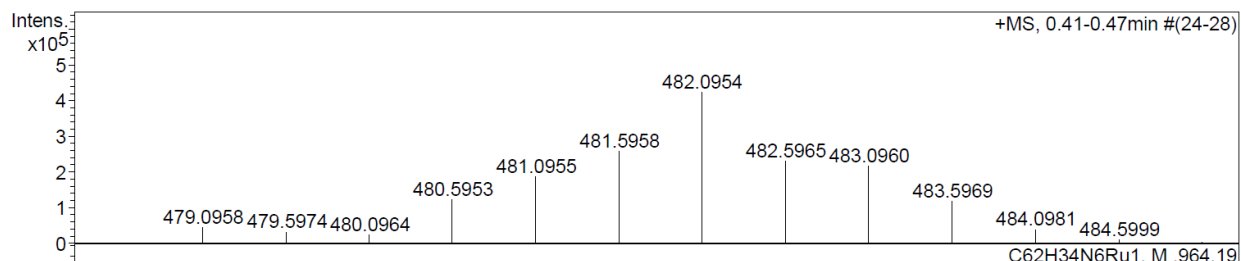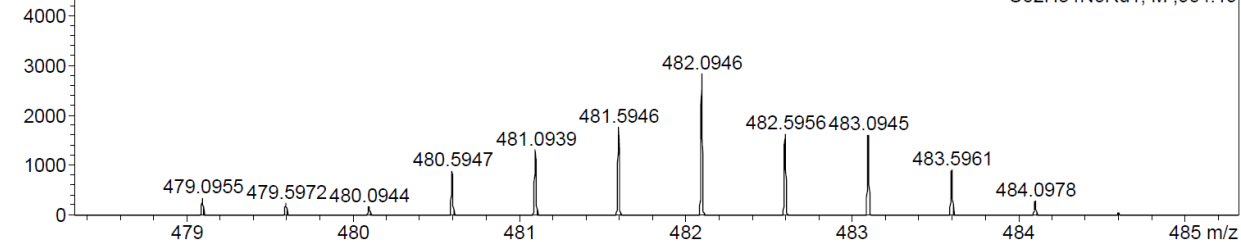

| Meas. m/z | # | Formula          | Score  | m/z      | err [mDa] | err [ppm] | mSigma | rdb  | e <sup>-</sup> Conf | N-Rule | z  |
|-----------|---|------------------|--------|----------|-----------|-----------|--------|------|---------------------|--------|----|
| 482.0954  | 1 | C 62 H 34 N 6 Ru | 100.00 | 482.0947 | -0.7      | -1.5      | 23.6   | 49.5 | odd                 | -      | 2+ |



## Decay of emission signal of the complexes Ru(L1)<sub>2</sub>-c and Ru(L1)<sub>2</sub> at 77 K:

Luminescence lifetimes and transient absorption spectra were recorded on an LP920-KS spectrometer from Edinburgh Instruments equipped with an iCCD detector from Andor. The excitation source was the frequency-doubled output from a Quantel Brilliant b laser. Decay of the emission signal at 630 nm of the open and the closed Ru(II) complexes in butyronitrile at 77K. The initial intense signal is due to laser stray light. Excitation occurred at 532 nm with laser pulses of ca. 10 ns duration.

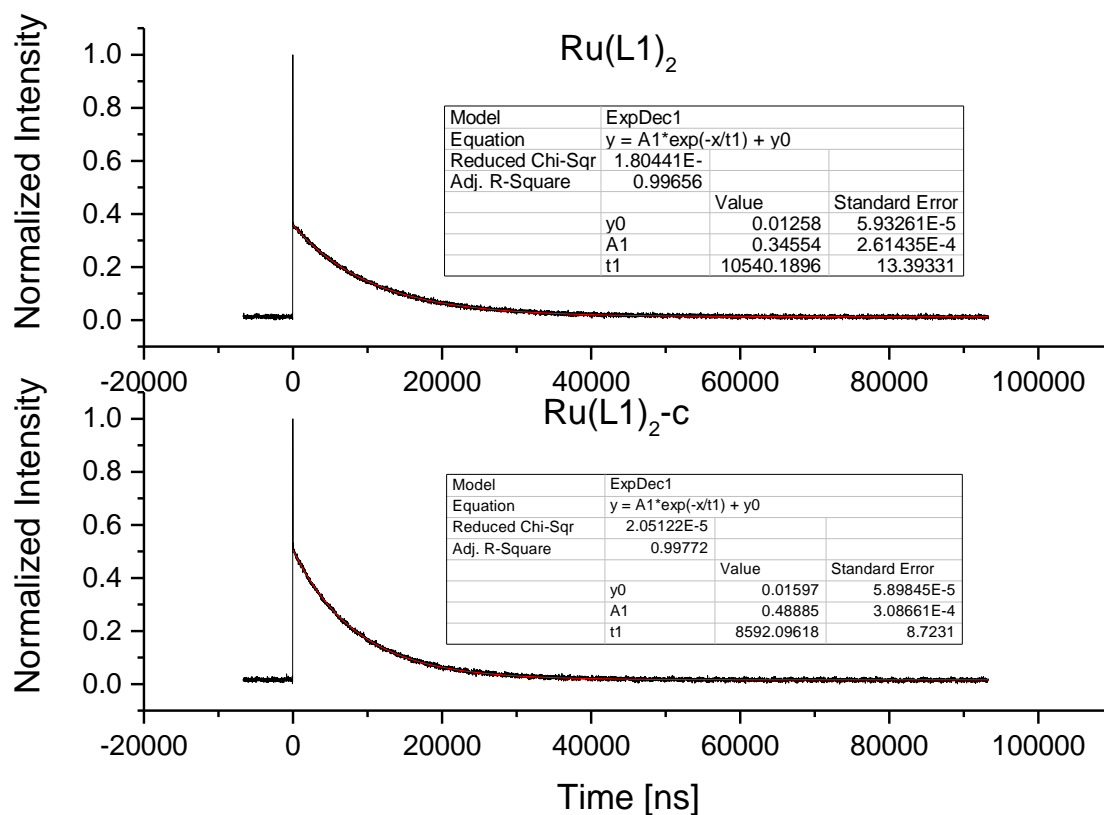

**Figure SI 1:** Decay of the emission signal at 630 nm of the open and the closed Ru(II) complexes in butyronitrile at 77K. The initial intense signal is due to laser stray light. Excitation occurred at 532 nm with laser pulses of ca. 10 ns duration.

### UV-Vis spectroscopy:

The UV-Vis spectra were recorded on a *Shimadzu* UV spectrometer UV-1800.  $\lambda_{\text{max}}$  was measured in nm. All solutions were prepared and measured under air saturated conditions in acetonitrile. UV/Vis spectra were recorded on a Shimadzu UV spectrometer UV-1800 using optical 1115F-QS Hellma cuvettes (10 mm light path). The wavelength of maxima absorption maxima ( $\lambda_{\text{max}}$ ) are reported in nm.

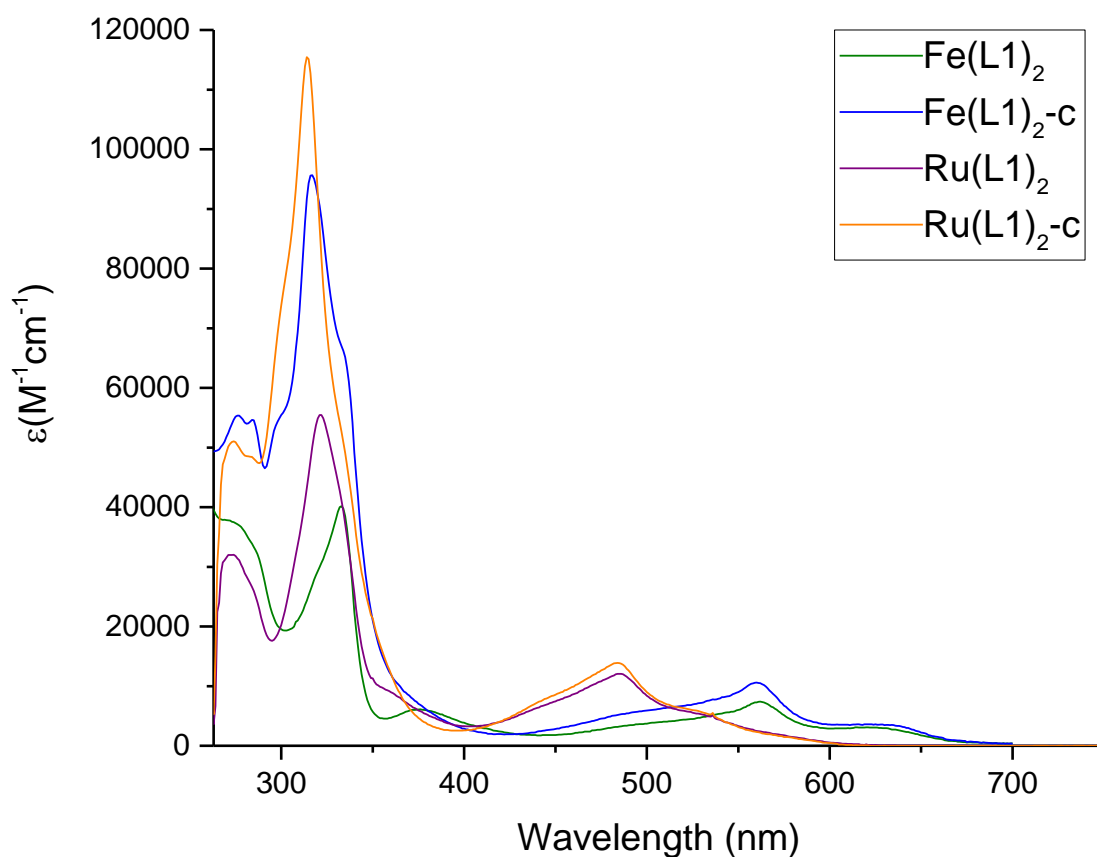

**Figure SI 2:** UV-Vis spectra of the open Fe(II) complex **Fe(L1)<sub>2</sub>**, the closed Fe(II) complex **Fe(L1)<sub>2</sub>-c**, the open Ru(II) complex **Ru(L1)<sub>2</sub>** and the closed Ru(II) complex **Ru(L1)<sub>2</sub>-c**.

### Cyclic Voltammetry measurements:

Cyclic voltammetry was performed on a Versastat3- 200 potentiostat from Princeton Applied Research using a glassy carbon disk as working electrode, a silver wire as pseudo reference electrode, and a silver wire as counter electrode, 0.1 M solution of TBAPF<sub>6</sub> in dichloromethane served as supporting electrolyte. Small amounts of ferrocene were added for internal voltage calibration. Prior to voltage sweeps at rates of 0.1 V s<sup>-1</sup>, the solutions were flushed with argon. Half-wave potentials ( $E_{1/2}$ ) were calculated from the average of reductive and oxidative peak potential. Peak separations ( $\Delta E$ ) are reported in Table SI 1.

**Table SI 1:** Half wave potential  $E_{1/2}$  in V vs. ferrocene and peak separations of the oxidative and the reductive potential  $\Delta E$ .

| Complex                     | Oxidation     |                | Reduction 1   |                | Reduction 2   |                |
|-----------------------------|---------------|----------------|---------------|----------------|---------------|----------------|
|                             | $E_{1/2}$ [V] | $\Delta E$ [V] | $E_{1/2}$ [V] | $\Delta E$ [V] | $E_{1/2}$ [V] | $\Delta E$ [V] |
| <b>Fe(L1)<sub>2</sub></b>   | 0.72          | 0.121          | -1.58         | 0.123          | -1.79         | 0.130          |
| <b>Fe(L1)<sub>2</sub>-c</b> | 0.82          | 0.082          | -1.53         | 0.078          | -1.76         | 0.097          |
| <b>Ru(L1)<sub>2</sub></b>   | 0.89          | 0.087          | -1.59         | 0.112          | -1.88         | 0.152          |
| <b>Ru(L1)<sub>2</sub>-c</b> | 0.99          | 0.095          | -1.54         | 0.079          | -1.87         | 0.131          |

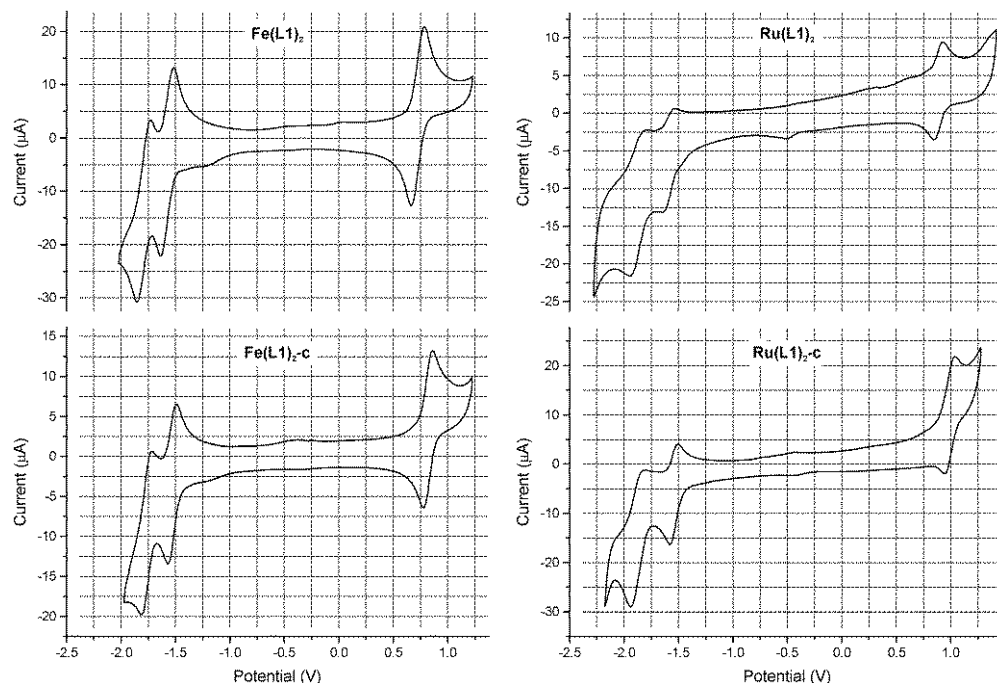

**Figure SI 3.** Cyclic voltammograms of the open and macrocyclized complexes (recorded in 0.1 m TBAPF<sub>6</sub> in DCM).

## Computational Methodology:

All density functional theory (DFT) calculations were carried out by using the GAUSSIAN 09 suite. Geometries for all complexes were optimized computationally using Becke's three-parameter exchange functional (B3)<sup>2</sup> in conjunction with the Lee, Yang, and Parr (LYP)<sup>3</sup> nonlocal functional. No geometry restrictions were used during the optimization and the LANL2DZ basis set was employed for all molecules.<sup>4</sup> Additional calculations on the Fe complexes were performed with the 6-31G(d) basis set.<sup>5</sup>

---

<sup>2</sup> Becke, A. D. *J. Chem. Phys.* **1993**, 98, 5648.

<sup>3</sup> (a) Lee, C.; Yang, W.; Parr, R. G. *Phys. Rev. B* **1988**, 37, 785. (b) Miehlich, B.; Savin, A.; Stoll, H.; Preuss, H. *Chem. Phys. Lett.* **1989**, 157, 200.

<sup>4</sup> (a) Hay, P. J.; Wadt, W. R. *J. Chem. Phys.* **1985**, 82, 299. (b) Hay, P. J.; Wadt, W. R. *J. Chem. Phys.* **1985**, 82, 270. (c) Hay, P. J.; Wadt, W. R. *J. Chem. Phys.* **1985**, 82, 284.

<sup>5</sup> Hariharan, P. C.; Pople, J. A. *Theor. Chim. Acta.* **1973**, 28, 213.

### Racemization experiments and determination of the inversion barrier of Fe(L1)<sub>2</sub>-c:

The complexes were irradiated with a blue LED at 450 nm (3 Watt) for 12 hours. Therefore one enantiomer of the complexes was dissolved in acetonitrile and placed in a thin test tube. The glass was placed in a shaker to move the solution and the LED was placed in close proximity (2 cm). Even after irradiating for 12 hours no racemization of the enantiomer was observed. For the next racemization experiment a "Polychrome V monochromator" from Till Photonics monochromator equipped with a 150 W Xenon high stability lamp and an optical fiber was used. The output power is specified as >10 mW at 470 nm. Irradiation in solution at 560 nm with a spectral transmission band of 2 nm of one enantiomer in acetonitrile for 12 hours did not result in racemization as monitored by HPLC.

Racemization experiments by oxidation and successive reduction were performed on a Versastat3- 200 potentiostat from Princeton Applied Research using a glassy carbon disk as working electrode, a silver wire as pseudo reference electrode, and a silver wire as counter electrode, 0.1 M solution of TBAPF<sub>6</sub> in dichloromethane served as supporting electrolyte. Even applying an oxidation potential of 1.5 V for 30 minutes and successive reductive potential of 0 V for 30 minutes did not lead to racemization.

The racemization experiments were performed in a high boiling solvent. Therefore several solvents like ethylene glycol, *o*-xylene, DMSO, 1-hexanol and *p*-cymene were tested. Unfortunately none of these solvents dissolved the Fe(L1)<sub>2</sub>-c complex. Suitable solvents that dissolves the complex like EtOH, acetonitrile, acetone, dichloromethane or 1,2-dichloroethane have a too low boiling point. The only possible solvents found were 1,1,2,2-tetrachlorethane and DMF. Due to possible side-reaction that sometimes arise in DMF close to refluxing temperatures, 1,1,2,2-tetrachlorethane was used for the racemization experiment. In order to be consistent in the experiment, always the first obtained enantiomer from the chiral HPLC was used.

The rate of racemization between the two enantiomers of Fe(L1)<sub>2</sub>-c can be described as a first order process with

$$\ln \left( \frac{[A]_t}{[A]_0} \right) = -k_{rac} t \quad (1)$$

with [A]<sub>0</sub> being the enantiomeric excess at t = 0, [A]<sub>t</sub> the enantiomeric excess at the observed time t and k<sub>rac</sub> the rate constant for the racemization.

The decay of the enantiomeric excess was determined by HPLC. Each temperature was measured three times and each sample was injected three times to HPLC in order to take the average enantiomeric excess values:

**Table SI 2:** Racemization measurement at 60 °C

| <b>60 °C 1<sup>st</sup> measurement</b> |                           |                           |                           |          |          |                                       |
|-----------------------------------------|---------------------------|---------------------------|---------------------------|----------|----------|---------------------------------------|
| time [s]                                | 1 <sup>st</sup> Injection | 2 <sup>nd</sup> Injection | 3 <sup>rd</sup> Injection | Average  | ee       | $\ln\left(\frac{[A]_t}{[A]_0}\right)$ |
| 0                                       | 75.3                      | 75.4                      | 76.2                      | 75.63333 | 51.26667 | 0                                     |
| 9000                                    | 73.7                      | 73.4                      | 73.9                      | 73.66667 | 47.33333 | -0.07983                              |
| 14400                                   | 73.3                      | 72.4                      | 72.2                      | 72.63333 | 45.26667 | -0.12447                              |
| 19800                                   | 72.5                      | 71.1                      | 71.8                      | 71.8     | 43.6     | -0.16198                              |
| 25200                                   | 71.1                      | 71.3                      | 70.8                      | 71.06667 | 42.13333 | -0.1962                               |
| 32400                                   | 70.1                      | 70.4                      | 70.8                      | 70.43333 | 40.86667 | -0.22673                              |
| 39600                                   | 69.5                      | 68.9                      | 68.7                      | 69.03333 | 38.06667 | -0.2977                               |
| 63900                                   | 65.1                      | 64.8                      | 65.7                      | 65.2     | 30.4     | -0.5226                               |
| 76500                                   | 63.7                      | 64.2                      | 64.1                      | 64       | 28       | -0.60484                              |
| 86400                                   | 62.8                      | 62.2                      | 63.4                      | 62.8     | 25.6     | -0.69445                              |

| <b>60 °C 2<sup>nd</sup> measurement</b> |                           |                           |                           |          |          |                                       |
|-----------------------------------------|---------------------------|---------------------------|---------------------------|----------|----------|---------------------------------------|
| time [s]                                | 1 <sup>st</sup> Injection | 2 <sup>nd</sup> Injection | 3 <sup>rd</sup> Injection | Average  | ee       | $\ln\left(\frac{[A]_t}{[A]_0}\right)$ |
| 0                                       | 77                        | 76.4                      | 75.9                      | 76.43333 | 52.86667 | 0                                     |
| 9000                                    | 74.4                      | 74.8                      | 74.2                      | 74.46667 | 48.93333 | -0.07731                              |
| 14400                                   | 74.6                      | 74.1                      | 74.2                      | 74.3     | 48.6     | -0.08415                              |
| 19800                                   | 72.6                      | 73.6                      | 73                        | 73.06667 | 46.13333 | -0.13624                              |
| 25200                                   | 72                        | 72                        | 69.2                      | 71.06667 | 42.13333 | -0.22693                              |
| 32400                                   | 71.5                      | 71.1                      | 71.9                      | 71.5     | 43       | -0.20657                              |
| 39600                                   | 69.5                      | 70                        | 69.9                      | 69.8     | 39.6     | -0.28894                              |
| 63900                                   | 65.3                      | 65.7                      | 66.3                      | 65.76667 | 31.53333 | -0.51673                              |
| 76500                                   | 64                        | 63.5                      | 64                        | 63.83333 | 27.66667 | -0.64754                              |
| 86400                                   | 63.5                      | 62.5                      | 62.5                      | 62.83333 | 25.66667 | -0.72258                              |

| <b>60 °C 3<sup>rd</sup> measurement</b> |                           |                           |                           |          |          |                                       |
|-----------------------------------------|---------------------------|---------------------------|---------------------------|----------|----------|---------------------------------------|
| time [s]                                | 1 <sup>st</sup> Injection | 2 <sup>nd</sup> Injection | 3 <sup>rd</sup> Injection | Average  | ee       | $\ln\left(\frac{[A]_t}{[A]_0}\right)$ |
| 0                                       | 76.5                      | 76.3                      | 76.3                      | 76.36667 | 52.73333 | 0                                     |
| 9000                                    | 75.5                      | 75.3                      | 75.1                      | 75.3     | 50.6     | -0.0413                               |
| 14400                                   | 74.5                      | 74.2                      | 74.7                      | 74.46667 | 48.93333 | -0.07479                              |
| 19800                                   | 72.7                      | 73.6                      | 73.1                      | 73.13333 | 46.26667 | -0.13083                              |
| 25200                                   | 72.1                      | 71.6                      | 73.7                      | 72.46667 | 44.93333 | -0.16007                              |
| 32400                                   | 69.5                      | 70.4                      | 71.5                      | 70.46667 | 40.93333 | -0.2533                               |

|       |      |      |      |          |          |          |
|-------|------|------|------|----------|----------|----------|
| 39600 | 69.9 | 69   | 70.1 | 69.66667 | 39.33333 | -0.29318 |
| 63900 | 65.9 | 65.4 | 65.8 | 65.7     | 31.4     | -0.51844 |
| 76500 | 64.4 | 64.1 | 63.8 | 64.1     | 28.2     | -0.62593 |
| 86400 | 62.6 | 61.9 | 62.7 | 62.4     | 24.8     | -0.7544  |

**Table SI 3:** Racemization measurement at 70 °C

| <b>70 °C 1<sup>st</sup> measurement</b> |                           |                           |                           |          |          |                                       |
|-----------------------------------------|---------------------------|---------------------------|---------------------------|----------|----------|---------------------------------------|
| time [s]                                | 1 <sup>st</sup> Injection | 2 <sup>nd</sup> Injection | 3 <sup>rd</sup> Injection | Average  | ee       | $\ln\left(\frac{[A]_t}{[A]_0}\right)$ |
| 0                                       | 98.9                      | 98.6                      | 98.6                      | 98.7     | 97.4     | 0                                     |
| 750                                     | 97.5                      | 97.8                      | 97.6                      | 97.63333 | 95.26667 | -0.02215                              |
| 3450                                    | 94.5                      | 94.4                      | 94.3                      | 94.4     | 88.8     | -0.09244                              |
| 11550                                   | 86                        | 86                        | 86.1                      | 86.03333 | 72.06667 | -0.30123                              |
| 21450                                   | 78                        | 77.8                      | 77.8                      | 77.86667 | 55.73333 | -0.55825                              |
| 26850                                   | 74.6                      | 74.6                      | 75                        | 74.73333 | 49.46667 | -0.67753                              |
| 30450                                   | 72.8                      | 72.6                      | 72.4                      | 72.6     | 45.2     | -0.76773                              |
| 34050                                   | 70.6                      | 70.8                      | 70.7                      | 70.7     | 41.4     | -0.85555                              |
| 43050                                   | 67.4                      | 67.4                      | 67.6                      | 67.46667 | 34.93333 | -1.02538                              |
| 48450                                   | 65.3                      | 66.3                      | 65.9                      | 65.83333 | 31.66667 | -1.12356                              |

| <b>70 °C 2<sup>nd</sup> measurement</b> |                           |                           |                           |          |          |                                       |
|-----------------------------------------|---------------------------|---------------------------|---------------------------|----------|----------|---------------------------------------|
| time [s]                                | 1 <sup>st</sup> Injection | 2 <sup>nd</sup> Injection | 3 <sup>rd</sup> Injection | Average  | ee       | $\ln\left(\frac{[A]_t}{[A]_0}\right)$ |
| 0                                       | 98.7                      | 98.9                      | 98.8                      | 98.8     | 97.6     | 0                                     |
| 900                                     | 97.9                      | 97.8                      | 97.6                      | 97.76667 | 95.53333 | -0.0214                               |
| 3600                                    | 95                        | 94.8                      | 94.9                      | 94.9     | 89.8     | -0.08329                              |
| 11700                                   | 87.1                      | 86.7                      | 87.3                      | 87.03333 | 74.06667 | -0.27591                              |
| 21600                                   | 78.9                      | 79.4                      | 79.1                      | 79.13333 | 58.26667 | -0.51585                              |
| 27000                                   | 75.6                      | 75.4                      | 75.6                      | 75.53333 | 51.06667 | -0.64775                              |
| 30600                                   | 73.2                      | 73.6                      | 72.9                      | 73.23333 | 46.46667 | -0.74214                              |
| 34200                                   | 71.5                      | 71.4                      | 71.1                      | 71.33333 | 42.66667 | -0.82746                              |
| 43200                                   | 67.4                      | 67.2                      | 67.7                      | 67.43333 | 34.86667 | -1.02935                              |
| 48600                                   | 65.4                      | 65.6                      | 65.5                      | 65.5     | 31       | -1.14689                              |

| <b>70 °C 3<sup>rd</sup> measurement</b> |                           |                           |                           |          |          |                                       |
|-----------------------------------------|---------------------------|---------------------------|---------------------------|----------|----------|---------------------------------------|
| time [s]                                | 1 <sup>st</sup> Injection | 2 <sup>nd</sup> Injection | 3 <sup>rd</sup> Injection | Average  | ee       | $\ln\left(\frac{[A]_t}{[A]_0}\right)$ |
| 0                                       | 98.8                      | 98.9                      | 99                        | 98.9     | 97.8     | 0                                     |
| 900                                     | 97.4                      | 97.3                      | 97.6                      | 97.43333 | 94.86667 | -0.03045                              |
| 3600                                    | 94.3                      | 94.5                      | 94.6                      | 94.46667 | 88.93333 | -0.09504                              |

|       |      |      |      |          |          |          |
|-------|------|------|------|----------|----------|----------|
| 11700 | 86.4 | 86.2 | 86.1 | 86.23333 | 72.46667 | -0.2998  |
| 21600 | 78.2 | 78.2 | 78.5 | 78.3     | 56.6     | -0.54692 |
| 27000 | 74.7 | 75.1 | 74.5 | 74.76667 | 49.53333 | -0.68028 |
| 30600 | 72.9 | 72.5 | 72.9 | 72.76667 | 45.53333 | -0.76448 |
| 34200 | 70.8 | 70.8 | 70.8 | 70.8     | 41.6     | -0.85482 |
| 43200 | 68.1 | 67.9 | 67.9 | 67.96667 | 35.93333 | -1.00126 |
| 48600 | 65.5 | 65.6 | 65.5 | 65.53333 | 31.06667 | -1.14679 |

Table SI 4: Racemization measurement at 80 °C

| 80 °C 1 <sup>st</sup> measurement |                           |                           |                           |          |          |                                       |
|-----------------------------------|---------------------------|---------------------------|---------------------------|----------|----------|---------------------------------------|
| time [s]                          | 1 <sup>st</sup> Injection | 2 <sup>nd</sup> Injection | 3 <sup>rd</sup> Injection | Average  | ee       | $\ln\left(\frac{[A]_t}{[A]_0}\right)$ |
| 0                                 | 94.3                      | 94.6                      | 94.4                      | 94.43333 | 88.86667 | 0                                     |
| 360                               | 92.5                      | 92.3                      | 92                        | 92.26667 | 84.53333 | -0.04999                              |
| 720                               | 90.3                      | 90.6                      | 90.3                      | 90.4     | 80.8     | -0.09516                              |
| 1080                              | 88.9                      | 88.9                      | 89.3                      | 89.03333 | 78.06667 | -0.12957                              |
| 1440                              | 87.4                      | 87.1                      | 87.1                      | 87.2     | 74.4     | -0.17768                              |
| 1800                              | 86.1                      | 85.4                      | 86.2                      | 85.9     | 71.8     | -0.21325                              |
| 2160                              | 84.6                      | 84.5                      | 84.7                      | 84.6     | 69.2     | -0.25014                              |
| 2520                              | 82.9                      | 83.4                      | 83.4                      | 83.23333 | 66.46667 | -0.29044                              |
| 2880                              | 82.3                      | 82.5                      | 82                        | 82.26667 | 64.53333 | -0.31996                              |
| 3240                              | 81                        | 80.6                      | 80.9                      | 80.83333 | 61.66667 | -0.36539                              |
| 3600                              | 79.8                      | 80.3                      | 79.8                      | 79.96667 | 59.93333 | -0.3939                               |
| 3960                              | 78.8                      | 78.9                      | 79.3                      | 79       | 58       | -0.42669                              |
| 4320                              | 77.4                      | 77.5                      | 77.4                      | 77.43333 | 54.86667 | -0.48223                              |
| 4680                              | 76.8                      | 76.7                      | 76.7                      | 76.73333 | 53.46667 | -0.50808                              |
| 5040                              | 75.6                      | 75.9                      | 76.2                      | 75.9     | 51.8     | -0.53975                              |
| 5400                              | 75.3                      | 75.5                      | 75.4                      | 75.4     | 50.8     | -0.55924                              |
| 5760                              | 73.9                      | 73.7                      | 74.1                      | 73.9     | 47.8     | -0.62011                              |
| 6120                              | 73.5                      | 73.7                      | 73.2                      | 73.46667 | 46.93333 | -0.63841                              |
| 6480                              | 71.9                      | 72.6                      | 72.8                      | 72.43333 | 44.86667 | -0.68344                              |

| 80 °C 2 <sup>nd</sup> measurement |                           |                           |                           |          |          |                                       |
|-----------------------------------|---------------------------|---------------------------|---------------------------|----------|----------|---------------------------------------|
| time [s]                          | 1 <sup>st</sup> Injection | 2 <sup>nd</sup> Injection | 3 <sup>rd</sup> Injection | Average  | ee       | $\ln\left(\frac{[A]_t}{[A]_0}\right)$ |
| 0                                 | 93.8                      | 93.8                      | 94.2                      | 93.93333 | 87.86667 | 0                                     |
| 360                               | 91.4                      | 92                        | 91.9                      | 91.76667 | 83.53333 | -0.05057                              |
| 720                               | 90.3                      | 90.3                      | 90                        | 90.2     | 80.4     | -0.08881                              |
| 1080                              | 88.9                      | 88.6                      | 88.9                      | 88.8     | 77.6     | -0.12425                              |
| 1440                              | 87.2                      | 87.1                      | 87.1                      | 87.13333 | 74.26667 | -0.16816                              |
| 1800                              | 85.6                      | 85.3                      | 85.9                      | 85.6     | 71.2     | -0.21033                              |



|      |      |      |      |          |          |          |
|------|------|------|------|----------|----------|----------|
| 2160 | 84.5 | 84.8 | 84.7 | 84.66667 | 69.33333 | -0.23689 |
| 2520 | 83.1 | 83.2 | 84   | 83.43333 | 66.86667 | -0.27312 |
| 2880 | 81.7 | 82.1 | 81.2 | 81.66667 | 63.33333 | -0.32741 |
| 3240 | 80.3 | 80.5 | 80.3 | 80.36667 | 60.73333 | -0.36933 |
| 3600 | 79.4 | 79.1 | 79.2 | 79.23333 | 58.46667 | -0.40736 |
| 3960 | 78.2 | 78.4 | 79   | 78.53333 | 57.06667 | -0.4316  |
| 4320 | 77   | 77   | 77   | 77       | 54       | -0.48684 |
| 4680 | 75.7 | 76.5 | 76.3 | 76.16667 | 52.33333 | -0.51819 |
| 5040 | 74.6 | 75.1 | 75.2 | 74.96667 | 49.93333 | -0.56513 |
| 5400 | 74.6 | 74.6 | 74.7 | 74.63333 | 49.26667 | -0.57857 |
| 5760 | 73.6 | 73.1 | 73.4 | 73.36667 | 46.73333 | -0.63136 |
| 6120 | 72.2 | 72.5 | 72.7 | 72.46667 | 44.93333 | -0.67064 |
| 6480 | 71.6 | 71.6 | 71.8 | 71.66667 | 43.33333 | -0.7069  |

### 80 °C 3<sup>rd</sup> measurement

| time [s] | 1 <sup>st</sup> Injection | 2 <sup>nd</sup> Injection | 3 <sup>rd</sup> Injection | Average  | ee       | $\ln\left(\frac{[A]_t}{[A]_0}\right)$ |
|----------|---------------------------|---------------------------|---------------------------|----------|----------|---------------------------------------|
| 0        | 93.7                      | 94                        | 93.8                      | 93.83333 | 87.66667 | 0                                     |
| 360      | 91.9                      | 92.1                      | 92.1                      | 92.03333 | 84.06667 | -0.04193                              |
| 720      | 90.2                      | 90.7                      | 90.7                      | 90.53333 | 81.06667 | -0.07827                              |
| 1080     | 88.8                      | 88.7                      | 89                        | 88.83333 | 77.66667 | -0.12112                              |
| 1440     | 87                        | 87.5                      | 87.3                      | 87.26667 | 74.53333 | -0.1623                               |
| 1800     | 86                        | 85.9                      | 85.5                      | 85.8     | 71.6     | -0.20245                              |
| 2160     | 84.6                      | 85.1                      | 84.4                      | 84.7     | 69.4     | -0.23365                              |
| 2520     | 83.5                      | 83.6                      | 84.1                      | 83.73333 | 67.46667 | -0.26191                              |
| 2880     | 82.5                      | 82                        | 82.3                      | 82.26667 | 64.53333 | -0.30636                              |
| 3240     | 81.1                      | 81.2                      | 81                        | 81.1     | 62.2     | -0.34319                              |
| 3600     | 79.6                      | 79.9                      | 79.9                      | 79.8     | 59.6     | -0.38589                              |
| 3960     | 78.3                      | 78.3                      | 78.8                      | 78.46667 | 56.93333 | -0.43166                              |
| 4320     | 77.4                      | 77.7                      | 77.4                      | 77.5     | 55       | -0.46621                              |
| 4680     | 77.2                      | 75.9                      | 76.4                      | 76.5     | 53       | -0.50325                              |
| 5040     | 75.9                      | 75.3                      | 75.8                      | 75.66667 | 51.33333 | -0.5352                               |
| 5400     | 75.6                      | 75.1                      | 74.7                      | 75.13333 | 50.26667 | -0.5562                               |
| 5760     | 74.1                      | 74                        | 73.9                      | 74       | 48       | -0.60234                              |
| 6120     | 72.9                      | 72.8                      | 72.6                      | 72.76667 | 45.53333 | -0.6551                               |
| 6480     | 72.1                      | 72                        | 72                        | 72.03333 | 44.06667 | -0.68784                              |

Table SI 5: Racemization measurement at 90 °C

### 90 °C 1<sup>st</sup> measurement

| time [s] | 1 <sup>st</sup> Injection | 2 <sup>nd</sup> Injection | 3 <sup>rd</sup> Injection | Average | ee | $\ln\left(\frac{[A]_t}{[A]_0}\right)$ |
|----------|---------------------------|---------------------------|---------------------------|---------|----|---------------------------------------|
|----------|---------------------------|---------------------------|---------------------------|---------|----|---------------------------------------|

|      |      |      |      |          |          |          |
|------|------|------|------|----------|----------|----------|
| 0    | 86.5 | 86.6 | 86.1 | 86.4     | 72.8     | 0        |
| 360  | 82.1 | 82.2 | 82.8 | 82.36667 | 64.73333 | -0.11744 |
| 720  | 79.5 | 79.3 | 78.6 | 79.13333 | 58.26667 | -0.22269 |
| 1080 | 76.1 | 75.9 | 76.3 | 76.1     | 52.2     | -0.33263 |
| 1440 | 73.4 | 74   | 73.2 | 73.53333 | 47.06667 | -0.43615 |
| 1800 | 72.2 | 71.5 | 71.5 | 71.73333 | 43.46667 | -0.51572 |
| 2160 | 69.7 | 69.2 | 69.9 | 69.6     | 39.2     | -0.61904 |
| 2520 | 67.7 | 68.1 | 67.6 | 67.8     | 35.6     | -0.71537 |
| 2880 | 66.1 | 66.5 | 65.9 | 66.16667 | 32.33333 | -0.81162 |
| 3240 | 64.9 | 64.2 | 65.1 | 64.73333 | 29.46667 | -0.90446 |
| 3600 | 63.7 | 63   | 63.3 | 63.33333 | 26.66667 | -1.0043  |

### 90 °C 2<sup>nd</sup> measurement

| time [s] | 1 <sup>st</sup> Injection | 2 <sup>nd</sup> Injection | 3 <sup>rd</sup> Injection | Average  | ee       | $\ln\left(\frac{[A]_t}{[A]_0}\right)$ |
|----------|---------------------------|---------------------------|---------------------------|----------|----------|---------------------------------------|
| 0        | 85.7                      | 85.8                      | 86                        | 85.83333 | 71.66667 | 0                                     |
| 360      | 81.9                      | 82.2                      | 81.4                      | 81.83333 | 63.66667 | -0.1203                               |
| 720      | 78.5                      | 78.2                      | 78.7                      | 78.46667 | 56.93333 | -0.23177                              |
| 1080     | 76.3                      | 76.3                      | 75.7                      | 76.1     | 52.2     | -0.32074                              |
| 1440     | 72.9                      | 73.7                      | 73.5                      | 73.36667 | 46.73333 | -0.42217                              |
| 1800     | 71.3                      | 71.5                      | 71.5                      | 71.43333 | 42.86667 | -0.5131                               |
| 2160     | 68.8                      | 70.1                      | 69.5                      | 69.46667 | 38.93333 | -0.60006                              |
| 2520     | 67.7                      | 67.3                      | 67.3                      | 67.43333 | 34.86667 | -0.72685                              |
| 2880     | 66.5                      | 66.3                      | 65.6                      | 66.13333 | 32.26667 | -0.80684                              |
| 3240     | 64.4                      | 64.5                      | 64.9                      | 64.6     | 29.2     | -0.89454                              |
| 3600     | 63.2                      | 62.8                      | 63.6                      | 63.2     | 26.4     | -0.9999                               |

### 90 °C 3<sup>rd</sup> measurement

| time [s] | 1 <sup>st</sup> Injection | 2 <sup>nd</sup> Injection | 3 <sup>rd</sup> Injection | Average  | ee       | $\ln\left(\frac{[A]_t}{[A]_0}\right)$ |
|----------|---------------------------|---------------------------|---------------------------|----------|----------|---------------------------------------|
| 0        | 86.6                      | 86                        | 86.6                      | 86.4     | 72.66667 | 0                                     |
| 360      | 82                        | 82.4                      | 82.4                      | 82.26667 | 64.71111 | -0.11595                              |
| 720      | 79.2                      | 79.2                      | 79                        | 79.13333 | 58.22222 | -0.22162                              |
| 1080     | 76.4                      | 76.5                      | 76.4                      | 76.43333 | 52.88889 | -0.31769                              |
| 1440     | 73.9                      | 74                        | 73.8                      | 73.9     | 47.8     | -0.41886                              |
| 1800     | 71.8                      | 71.8                      | 71.5                      | 71.7     | 43.33333 | -0.51696                              |
| 2160     | 69.4                      | 69.8                      | 69.7                      | 69.63333 | 39.42222 | -0.61155                              |
| 2520     | 68                        | 68                        | 67.5                      | 67.83333 | 35.55556 | -0.71479                              |
| 2880     | 66.1                      | 66.7                      | 66.3                      | 66.36667 | 32.91111 | -0.79207                              |
| 3240     | 64.8                      | 65.3                      | 64.4                      | 64.83333 | 29.68889 | -0.89511                              |
| 3600     | 63.5                      | 63.6                      | 64                        | 63.7     | 27.53333 | -0.97049                              |

Plotting  $t$  against  $\ln\left(\frac{[A]_t}{[A]_0}\right)$  gives a linear relation with the slope that corresponds to  $k_{rac}$  directly:

**Table SI 6:** Rate constants for the different temperatures

| Temperature |    | 1st measurement | 2nd measurement | 3rd measurement | Average    | Standard deviation |
|-------------|----|-----------------|-----------------|-----------------|------------|--------------------|
| 60 °C       | k= | 7.99E-06        | 8.5E-06         | 8.83E-06        | 8.4395E-06 | 4.25891E-07        |
| 70 °C       | k= | 2.37E-05        | 2.39E-05        | 2.36E-05        | 2.3732E-05 | 1.08805E-07        |
| 80 °C       | k= | 0.000103        | 0.000108        | 0.000105        | 0.00010545 | 2.6183E-06         |
| 90 °C       | k= | 0.000275        | 0.000273        | 0.000269        | 0.00027242 | 2.79383E-06        |

The k values can be used to determine the free Gibbs energy of racemization  $\Delta G^\ddagger$  by the rearranged Eyring equation:

$$\Delta G_{(T)}^\ddagger = RT \left[ \ln \left( \frac{\kappa k_B T}{h} \right) - \ln \left( \frac{k_{rac}}{2} \right) \right] \quad (2)$$

Where  $k_{rac}$  is the obtained kinetic rate constant,  $\kappa$  the transition factor ( $\kappa = 0.5$ ),  $k_B$  the Boltzmann constant ( $k_B = 1.380662 \times 10^{-23} \text{ J K}^{-1}$ ),  $h$  the Planck's constant ( $h = 6.626176 \times 10^{-34} \text{ J s}$ ),  $R$  the universal gas constant ( $R = 8.31446 \text{ J K}^{-1} \text{ mol}^{-1}$ ) and  $T$  the temperature in Kelvin.

**Table SI 7:** Calculated values for the free Gibbs energy in kJ/mol

| $\Delta G_{(K)}^\ddagger$ [kJ/mol] | 1st measurement | 2nd measurement | 3rd measurement | Average | Standard deviation |
|------------------------------------|-----------------|-----------------|-----------------|---------|--------------------|
| $\Delta G_{(353.15K)}^\ddagger$    | 121.5           | 121.3           | 121.2           | 121.3   | 0.15               |
| $\Delta G_{(363.15K)}^\ddagger$    | 118.3           | 118.2           | 118.3           | 118.3   | 0.01               |
| $\Delta G_{(373.15K)}^\ddagger$    | 113.9           | 113.8           | 113.9           | 113.9   | 0.07               |
| $\Delta G_{(383.15K)}^\ddagger$    | 111.1           | 111.1           | 111.1           | 111.1   | 0.03               |

Using the Eyring equation

$$k = \frac{\kappa k_B T}{h} e^{-\frac{\Delta G^\ddagger}{RT}} \quad (3)$$

And substituting  $\Delta G^\ddagger$  by

$$\Delta G_{(T)}^\ddagger = \Delta H^\ddagger - T\Delta S^\ddagger \quad (4)$$

gives

$$k = \frac{\kappa k_B T}{h} e^{-\frac{\Delta H^\ddagger + T\Delta S^\ddagger}{RT}} \quad (5)$$

which can be brought in a linear form:

$$\ln\left(\frac{k}{T}\right) = -\left(\frac{\Delta H^\ddagger}{R}\right)\left(\frac{1}{T}\right) + \frac{\Delta S^\ddagger}{R} + \ln\frac{\kappa k_B}{h} \quad (6)$$

This equation states that plotting  $\ln\left(\frac{k}{T}\right)$  vs.  $\frac{1}{T}$  yield a straight line with slope =  $-\left(\frac{\Delta H^\ddagger}{R}\right)$  and intercept =  $\frac{\Delta S^\ddagger}{R} + \ln\frac{\kappa k_B}{h}$ .

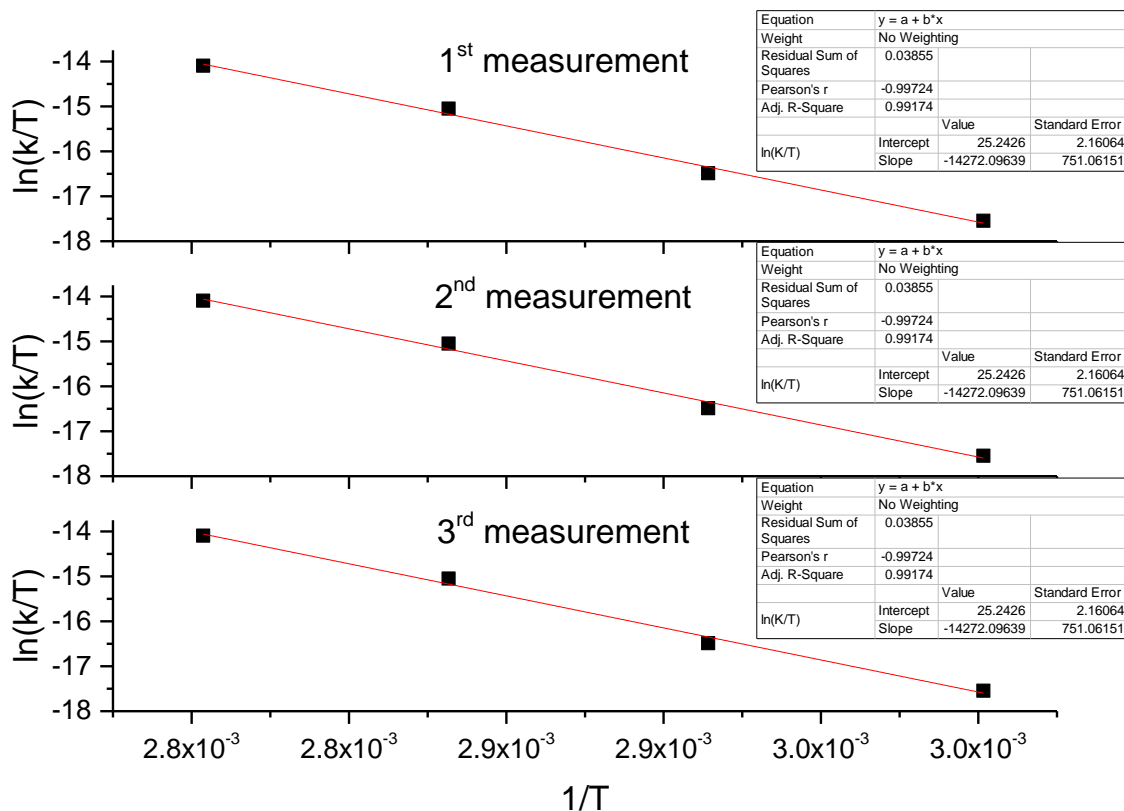

Figure SI 4: Eyring plot

Table SI 8: The obtained values for  $\Delta H^\ddagger$  and  $\Delta S^\ddagger$  are:

|                                 | 1st measurement | 2nd measurement | 3rd measurement | Average | Standard deviation |
|---------------------------------|-----------------|-----------------|-----------------|---------|--------------------|
| $\Delta H^\ddagger$ [kJ/mol]    | 118.7           | 117.0           | 115.2           | 117.0   | 1.73               |
| $\Delta S^\ddagger$ [J/(mol*K)] | 18.1            | 13.6            | 8.3             | 13.4    | 4.9                |

With the Arrhenius equation  $k = Ae^{-\frac{E_a}{RT}}$  it is possible to plot  $\ln(k)$  vs.  $\frac{1}{T}$  to get the activation energy:

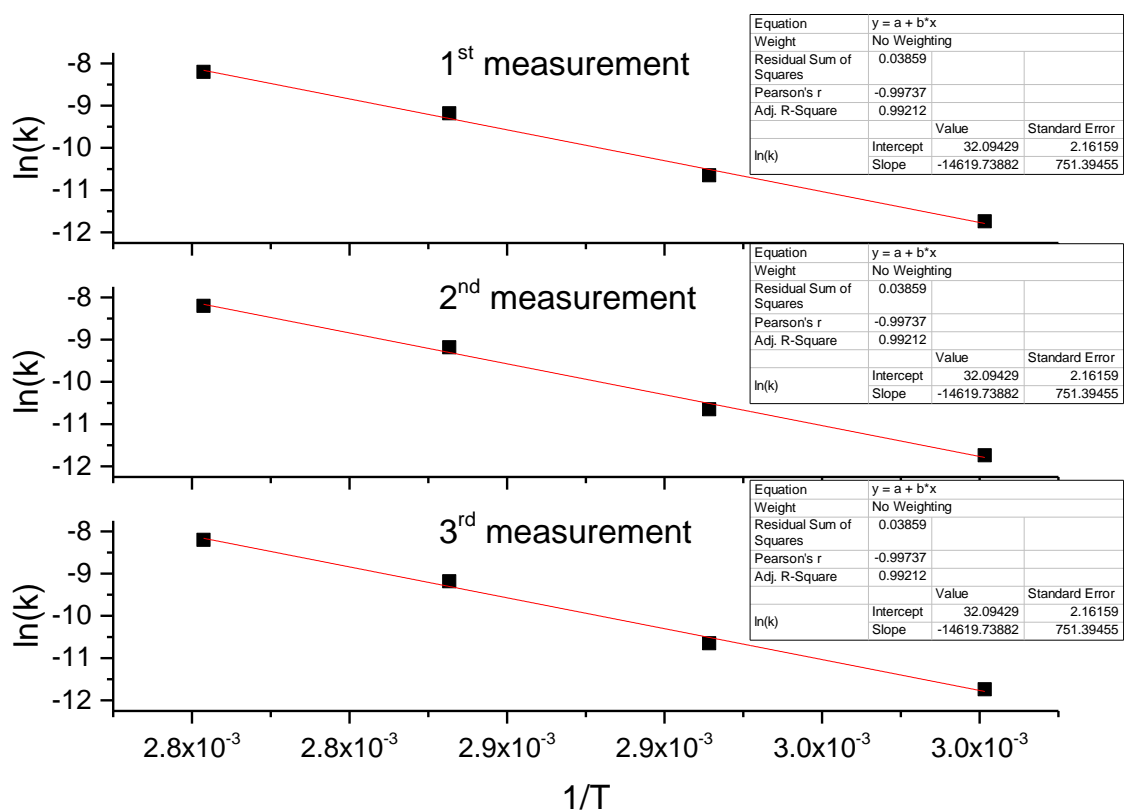

Figure SI 5: Arrhenius plot

Table SI 9: The obtained values for  $E_a$  are:

|                | 1st measurement | 2nd measurement | 3rd measurement | Average | Standard deviation |
|----------------|-----------------|-----------------|-----------------|---------|--------------------|
| $E_a$ [kJ/mol] | 121.6           | 119.9           | 118.1           | 119.9   | 1.73               |

Furthermore, by using the Arrhenius plot, it is possible to recalculate  $\Delta G_{(298.15K)}^\ddagger$  and  $k_{298.15K}$  in order to get the  $t_{1/2}$  at these temperatures:

Table SI 10: Recalculated values at room temperature:

|                                          | 1st measurement | 2nd measurement | 3rd measurement | Average  | Standard deviation |
|------------------------------------------|-----------------|-----------------|-----------------|----------|--------------------|
| $\Delta G_{(298.15K)}^\ddagger$ [kJ/mol] | 115.0           | 114.7           | 114.5           | 114.7    | 0.28               |
| $k_{298.15K}$                            | 4.38838E-08     | 4.97E-08        | 5.49E-08        | 4.95E-08 | 5.52E-09           |
| $t_{1/2}$ in days                        | 182.8           | 161.5           | 146.1           | 163.5    | 18.4               |

### Crystal data for Ru(L1)<sub>2</sub>-c and Fe(L1)<sub>2</sub>-c:

Compound **Ru(L1)<sub>2</sub>-c** crystallizes in the tetragonal space group *P4<sub>2</sub>,c* with four formula units and four additional molecules of diethyl ether per unit cell. The Ru atom of the dication [Ru(N<sub>6</sub>C<sub>62</sub>H<sub>34</sub>)]<sup>2+</sup> (figure SI 5) is located on a crystallographic 2-fold axis; and it is coordinated by the six nitrogen atoms of the macrocyclic ligand, which are forming a highly distorted octahedron (*cis*-N-Ru-N angles 78.7°–103.1°; *trans*-N-Ru-N angles: 157.3° and 177.3°, figure SI 7).

Compound **Fe(L1)<sub>2</sub>-c** crystallizes in the orthorhombic space group *Fdd2* with eight formula units per unit cell. Also in this structure the metal atom is located on a twofold axes of the space group *Fdd2*. Figure SI 9 illustrates the similarity of the two compounds by overlaying them on top of each other. The bond angles around the Fe atom differ for this reason only slightly (*cis*-N-Fe-N angles 80.5°–99.7°; *trans*-N-Fe-N angles: 161.3° and 179.7°).

For both structures the diffraction data were collected on a Stoe StadiVari diffractometer attached to a Ga Metaljet X-ray source at low temperature.

Compound **Ru(L1)<sub>2</sub>-c**: Using Olex2<sup>6</sup>, the structure was solved with the ShelXS<sup>7</sup> structure solution program using Direct Methods and refined with the ShelXL<sup>8</sup> refinement package using Least Squares minimization. Non-hydrogen atoms were refined anisotropically (atoms of the disordered solvent molecule were refined isotropically); hydrogen atoms were modeled on idealized positions. Molecular drawings were generated using Diamond3.2<sup>9</sup>.

Compound **Fe(L1)<sub>2</sub>-c**: The structure was solved with the program Superflip<sup>10</sup> using the charge flipping method and refined with CRYSTALS<sup>11</sup> using Least Squares minimization. Non-hydrogen atoms were refined anisotropically. About 37% of the volume of the structure is occupied by disordered solvent molecules. As interpretation of the electron density map in terms of molecules was not possible SQUEEZE<sup>12</sup> has been used in order to complete the refinement. The electron

---

<sup>6</sup>O.V. Dolomanov, L.J. Bourhis, R.J. Gildea, J.A.K. Howard, H. Puschmann, *J. Appl. Cryst.* **2009**, *42*, 339–341.

<sup>7</sup>G.M. Sheldrick, *Acta Cryst.* **2008**, *A64*, 112–122.

<sup>8</sup>G.M. Sheldrick, *Acta Cryst.* **2015**, *C71*, 3–8.

<sup>9</sup>K. Brandenburg, Crystal Impact GbR, Bonn, Germany, 1997-2016.

<sup>10</sup>L. Palatinus, G. Chapuis, *J. Appl. Cryst.* **2007**, *40*, 786-790.

<sup>11</sup>P.W. Betteridge, J.R. Carruthers, R.I. Cooper, K. Prout, D.J. Watkin, *J. Appl. Cryst.* **2003**, *36*, 1487.

<sup>12</sup>A.L. Spek, *Acta Cryst.* **2009**, *D65*, 148-155.

density removed by SQUEEZE corresponds to about 230 electrons per formula unit. Hydrogen atoms were included in the refinement as fixed contributions. Molecular drawings were generated using Mercury<sup>13</sup>.

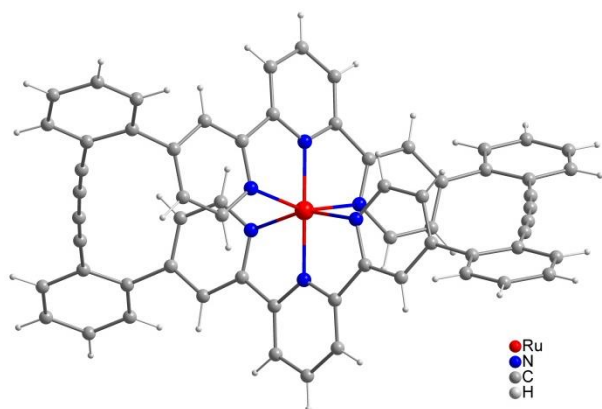

**Figure SI 6:** Molecular structure of the dication [Ru(N<sub>6</sub>C<sub>62</sub>H<sub>34</sub>)]<sup>2+</sup> in **1**.

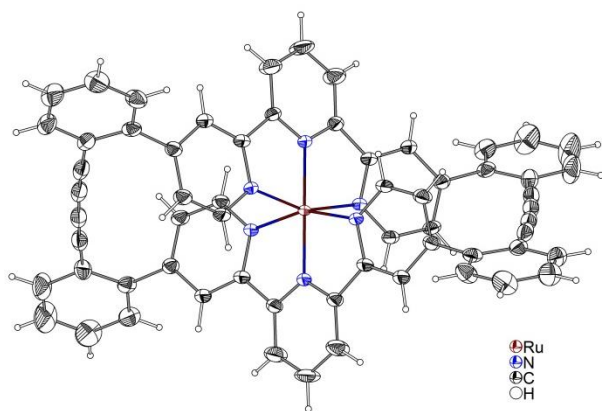

**Figure SI 7:** Ortep Plot (50 % probability) of the dication [Ru(N<sub>6</sub>C<sub>62</sub>H<sub>34</sub>)]<sup>2+</sup> in **1**.

---

<sup>13</sup> C. F. Macrae, I. J. Bruno, J. A. Chisholm, P. R. Edgington, P. McCabe, E. Pidcock, L. Rodriguez-Monge, R. Taylor, J. van de Streek and P. A. Wood, *J. Appl. Cryst.* **2008**, 41, 466-470.

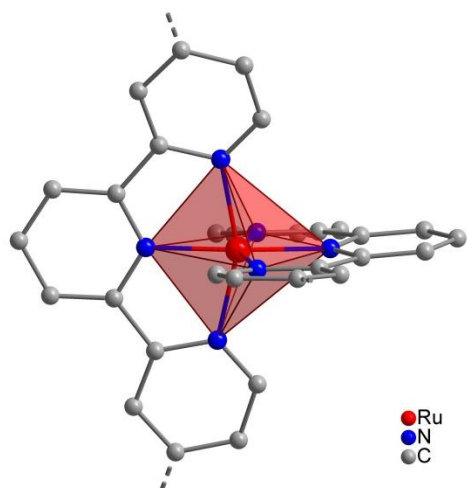

**Figure SI 8:** The coordination sphere around the Ru atom in the dication  $[\text{Ru}(\text{N}_6\text{C}_{62}\text{H}_{34})]^{2+}$  in **1**.

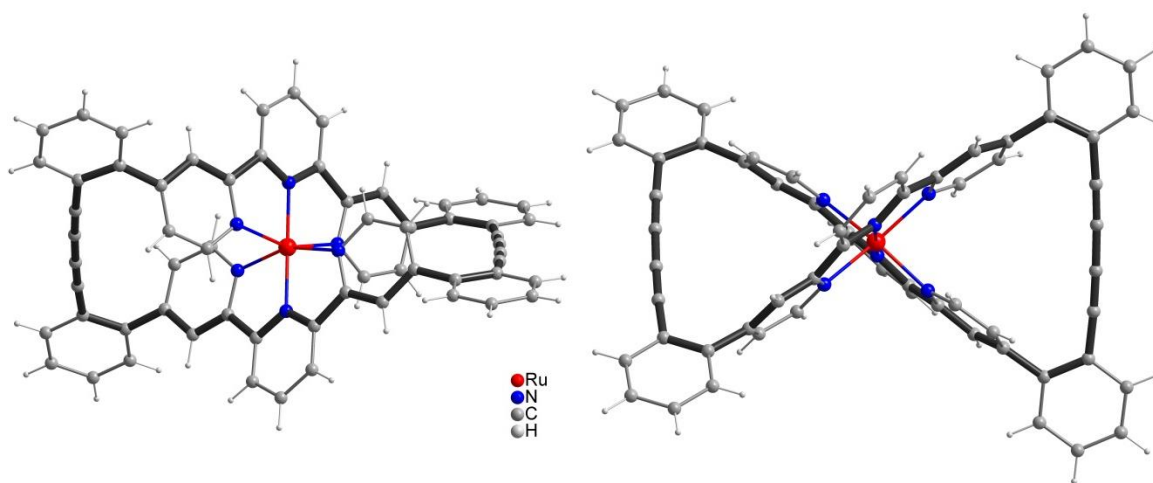

**Figure SI 9:** Two representations of the dication  $[\text{Ru}(\text{N}_6\text{C}_{62}\text{H}_{34})]^{2+}$  in **1** (rotated by  $90^\circ$ ) demonstrating the conformation of the macrocyclic ligand around the Ru atom.



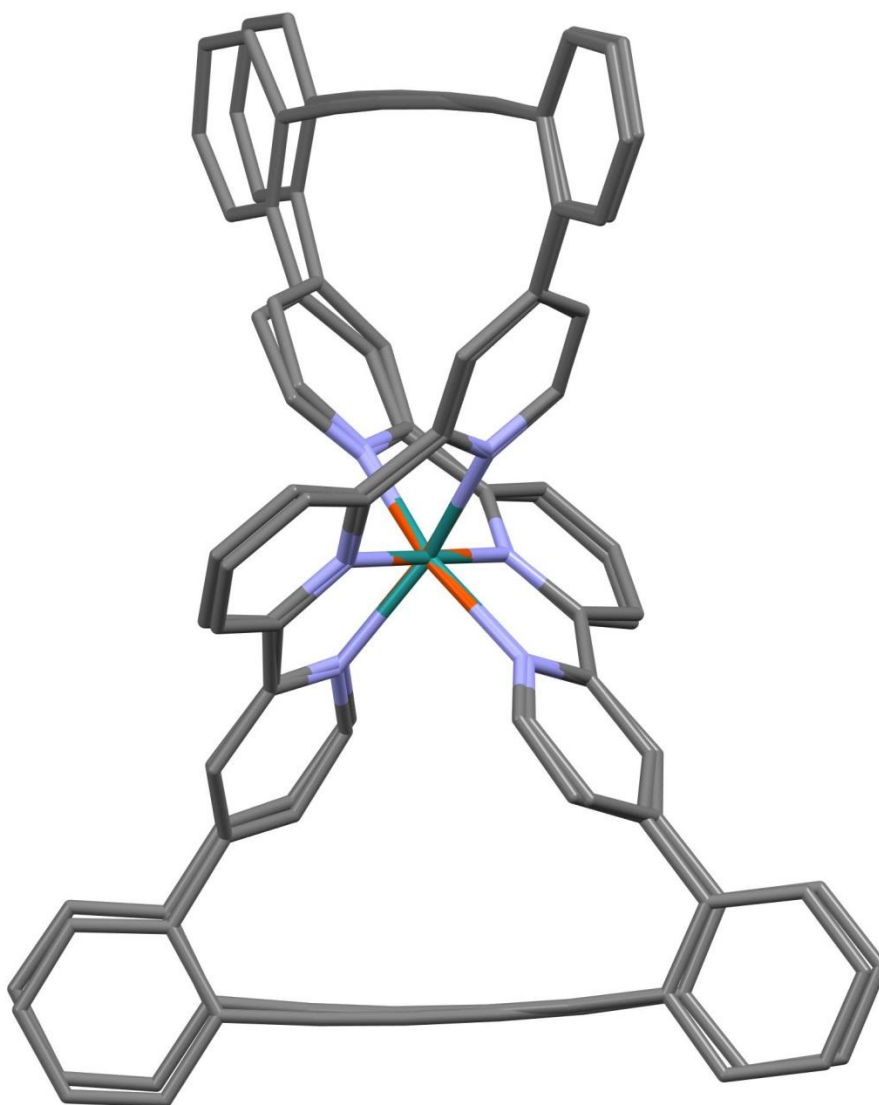

**Figure SI 10:** Overlay of the two compounds, the iron atom is displayed in orange, the ruthenium atom in green.

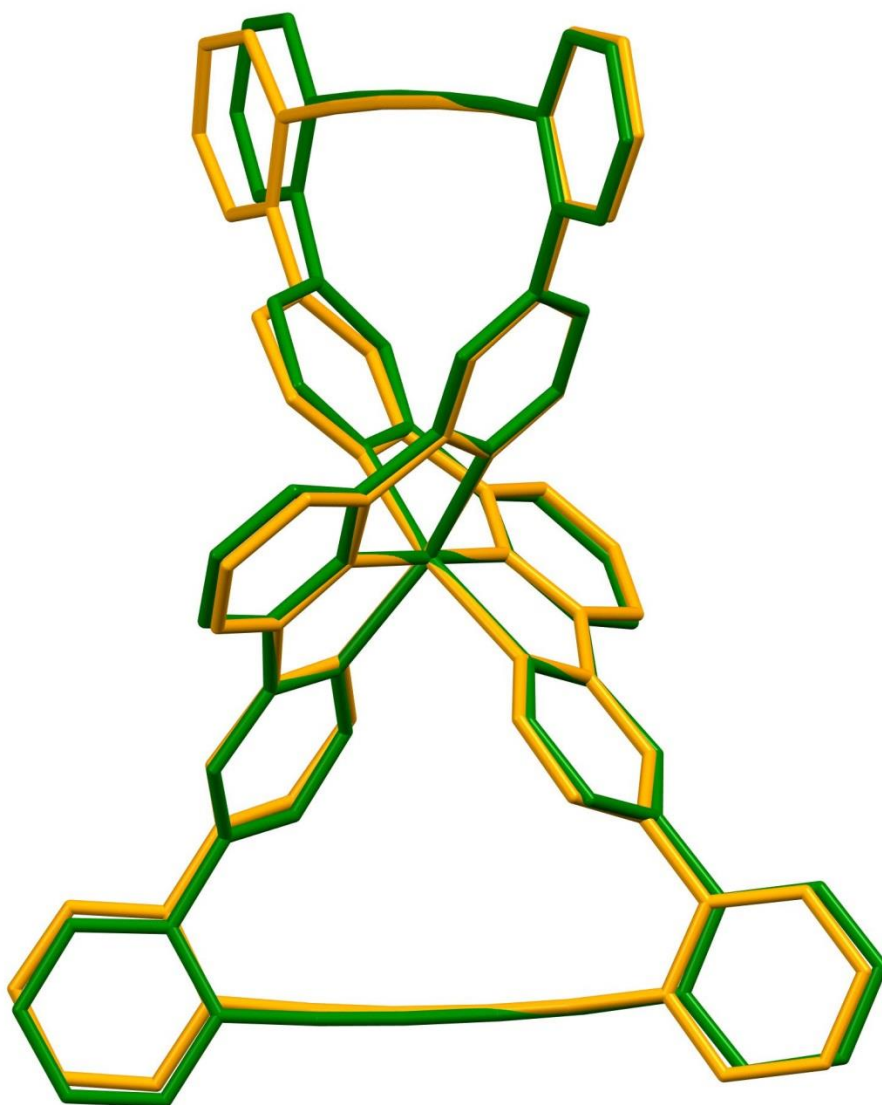

**Figure SI 11:** Overlay of the two compounds, the iron complex is displayed in yellow, the ruthenium complex in green.

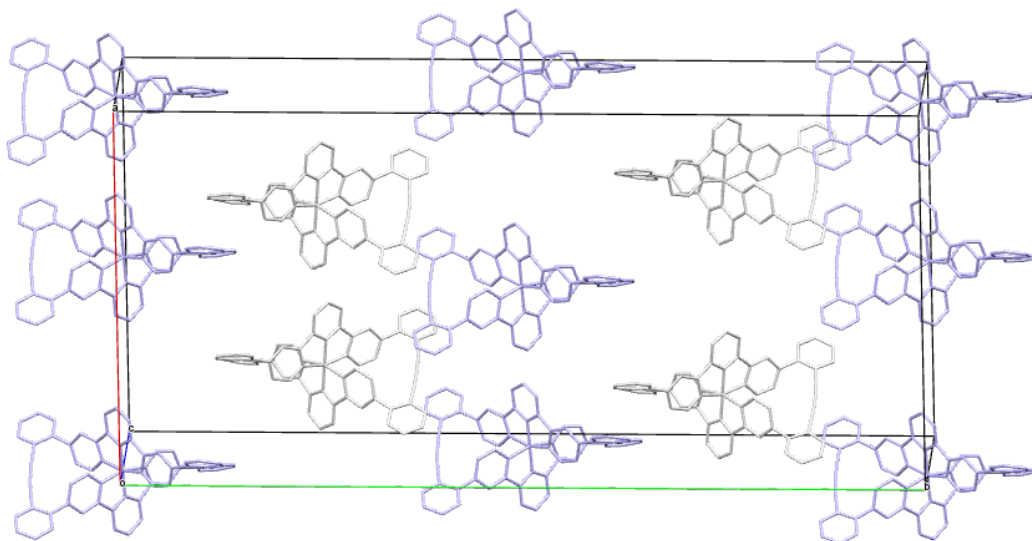

**Figure SI 12:** X-Ray structure of racemic **Fe(L1)<sub>2</sub>-c**. The cell contains 8 molecules, four of each enantiomer. The hydrogen atoms and the PF<sub>6</sub><sup>-</sup> counter ion were omitted for clarity reasons. Colour code: bridge: green, carbon: grey, nitrogen: blue, iron: orange (a,b) ; enantiomers: light blue, light grey (c).

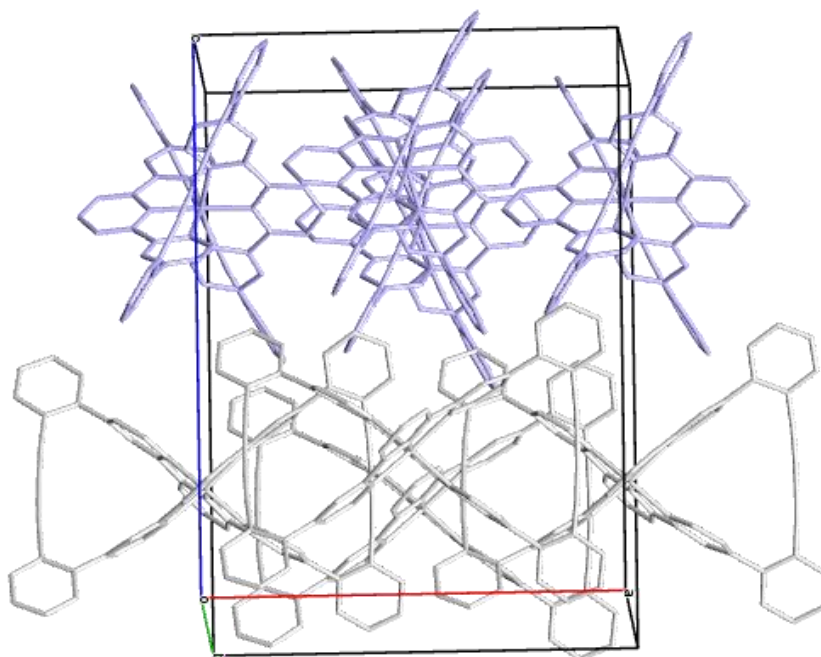

**Figure SI 13:** X-Ray structure of racemic **Ru(L1)<sub>2</sub>-c**. The cell contains 4 molecules, two of each enantiomer. The hydrogen atoms and the PF<sub>6</sub><sup>-</sup> counter ions were omitted for clarity reasons. Colour code: enantiomers: light blue, light grey.

**Table SI 11:** Crystal data and structure refinement for Ru(L1)<sub>2</sub>-c and Fe(L1)<sub>2</sub>-c

| Compound                                    | <b>Ru(L1)<sub>2</sub>-c</b> · C <sub>4</sub> H <sub>10</sub> O                                                                                                                                               | <b>Fe(L1)<sub>2</sub>-c</b>                                                                                                                                             |
|---------------------------------------------|--------------------------------------------------------------------------------------------------------------------------------------------------------------------------------------------------------------|-------------------------------------------------------------------------------------------------------------------------------------------------------------------------|
| Empirical formula                           | C <sub>66</sub> H <sub>44</sub> F <sub>12</sub> N <sub>6</sub> OP <sub>2</sub> Ru<br>[Ru(N <sub>6</sub> C <sub>62</sub> H <sub>34</sub> )](PF <sub>6</sub> ) <sub>2</sub> · C <sub>4</sub> H <sub>10</sub> O | C <sub>62</sub> H <sub>34</sub> F <sub>12</sub> FeN <sub>6</sub> P <sub>2</sub><br>[Fe(N <sub>6</sub> C <sub>62</sub> H <sub>34</sub> )](PF <sub>6</sub> ) <sub>2</sub> |
| Formula weight                              | 1328.08                                                                                                                                                                                                      | 1208.76                                                                                                                                                                 |
| Temperature/K                               | 123.0                                                                                                                                                                                                        | 123.0                                                                                                                                                                   |
| Crystal system                              | tetragonal                                                                                                                                                                                                   | orthorhombic                                                                                                                                                            |
| Space group                                 | <i>P</i> 4 <sub>2</sub> <i>c</i>                                                                                                                                                                             | <i>F</i> dd2                                                                                                                                                            |
| a/Å                                         | 16.39200(10)                                                                                                                                                                                                 | 27.5449(3)                                                                                                                                                              |
| b/Å                                         | 16.39200(10)                                                                                                                                                                                                 | 55.4159(8)                                                                                                                                                              |
| c/Å                                         | 21.9038(2)                                                                                                                                                                                                   | 10.2412(15)                                                                                                                                                             |
| α/°                                         | 90                                                                                                                                                                                                           | 90                                                                                                                                                                      |
| β/°                                         | 90                                                                                                                                                                                                           | 90                                                                                                                                                                      |
| γ/°                                         | 90                                                                                                                                                                                                           | 90                                                                                                                                                                      |
| Volume/Å <sup>3</sup>                       | 5885.50(9)                                                                                                                                                                                                   | 15632(2)                                                                                                                                                                |
| Z                                           | 4                                                                                                                                                                                                            | 8                                                                                                                                                                       |
| ρ <sub>calc</sub> /cm <sup>3</sup>          | 1.499                                                                                                                                                                                                        | 1.027                                                                                                                                                                   |
| μ/mm <sup>-1</sup>                          | 2.263                                                                                                                                                                                                        | 1.669                                                                                                                                                                   |
| F(000)                                      | 2688.0                                                                                                                                                                                                       | 4896.0                                                                                                                                                                  |
| Crystal size/mm <sup>3</sup>                | 0.21 × 0.14 × 0.07                                                                                                                                                                                           | 0.14 × 0.11 × 0.03                                                                                                                                                      |
| Radiation                                   | GaKα (λ = 1.34143)                                                                                                                                                                                           | GaKα (λ = 1.34143)                                                                                                                                                      |
| 2Θ range for data collection/°              | 5.858 to 114.876                                                                                                                                                                                             | 5.55 to 120.062                                                                                                                                                         |
| Index ranges                                | -15 ≤ h ≤ 20<br>-20 ≤ k ≤ 18<br>-27 ≤ l ≤ 27                                                                                                                                                                 | -33 ≤ h ≤ 35<br>-71 ≤ k ≤ 68<br>-7 ≤ l ≤ 13                                                                                                                             |
| Reflections collected                       | 119994                                                                                                                                                                                                       | 60208                                                                                                                                                                   |
| Independent reflections                     | 6077 [ <i>R</i> <sub>int</sub> = 0.0278, <i>R</i> <sub>σ</sub> = 0.0061]                                                                                                                                     | 6558 [ <i>R</i> <sub>int</sub> = 0.025]                                                                                                                                 |
| Data/restraints/parameters                  | 6077/6/397                                                                                                                                                                                                   | 5455/1/376                                                                                                                                                              |
| Goodness-of-fit on F <sup>2</sup>           | 1.027                                                                                                                                                                                                        | 1.049                                                                                                                                                                   |
| Final R indexes [I ≥ 2σ(I)]                 | <i>R</i> <sub>1</sub> = 0.0335, <i>wR</i> <sub>2</sub> = 0.0967                                                                                                                                              | <i>R</i> <sub>1</sub> = 0.0366, <i>wR</i> <sub>2</sub> = 0.0428                                                                                                         |
| Final R indexes [all data]                  | <i>R</i> <sub>1</sub> = 0.0341, <i>wR</i> <sub>2</sub> = 0.0974                                                                                                                                              | <i>R</i> <sub>1</sub> = 0.0399, <i>wR</i> <sub>2</sub> = 0.0455                                                                                                         |
| Largest diff. peak/hole / e Å <sup>-3</sup> | 0.54/-0.79                                                                                                                                                                                                   | 0.23/-0.27                                                                                                                                                              |
| Flack parameter                             | -0.018(2)                                                                                                                                                                                                    | 0.488(5)                                                                                                                                                                |
| CCDC number                                 | 1533848                                                                                                                                                                                                      | 1533847                                                                                                                                                                 |

## HPLC Chromatograms:

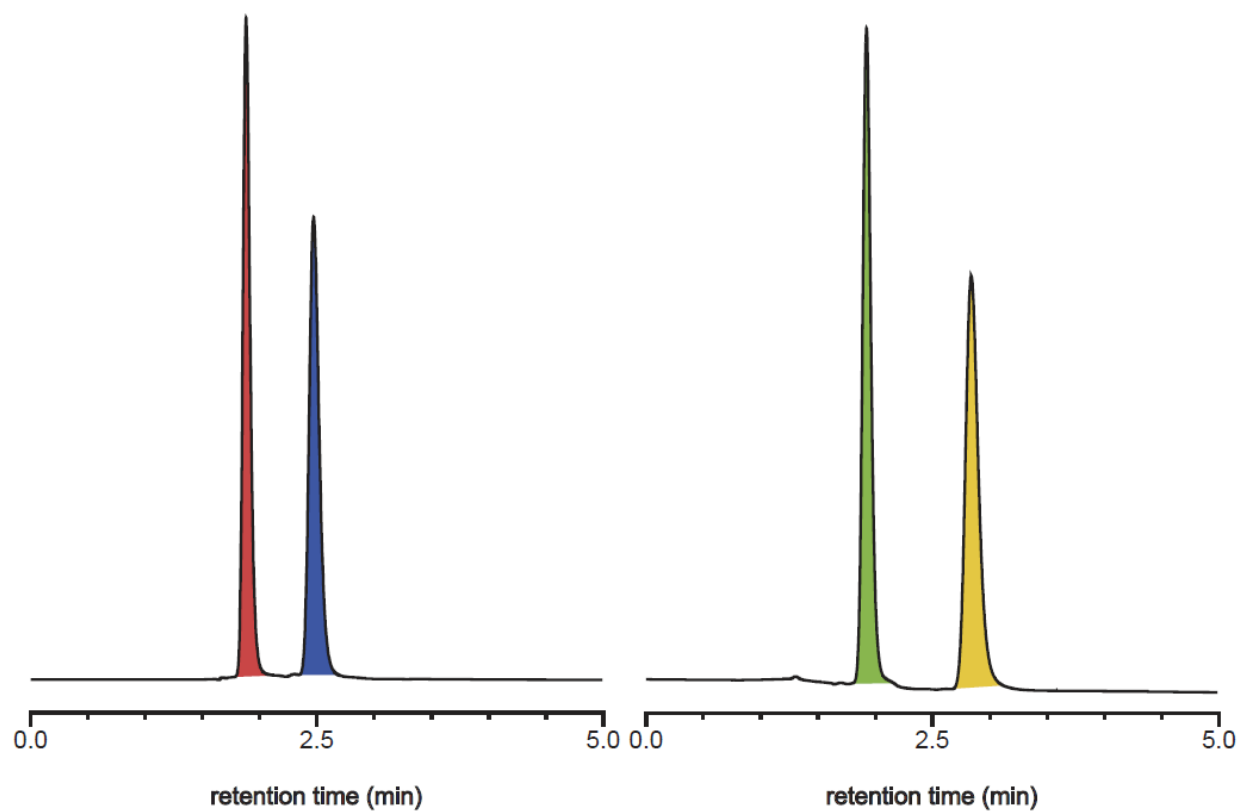

**Figure SI 14:** HPLC chromatograms of the racemates, showing the enantiomeric resolution for **Fe(L1)<sub>2</sub>-c** (left) and **Ru(L1)<sub>2</sub>-c** (right). Chiralpak IB column, eluent: EtOH/MeOH/TEA/TFA 50:50:0.5:0.3, 2 mL min<sup>-1</sup>, T = 40 °C.

## High dilution macrocyclization experiment of the free ligand **L1**:

An interesting aspect is the importance of the templating in a  $M(II)$  complex for the success of the macrocyclization. In order to shine light on this issue, high dilution macrocyclization experiments were performed with the ligand **L1**. Based on the experience we have in the lab with high dilution experiments, the active concentration of **L1** was further reduced by adding it with a syringe pump. In spite of several approaches, the closed macrocycle  $(\mathbf{L1})_2$  could neither be detected in reasonable yields nor be isolated. Particular challenging for the high dilution reaction is that the copper ions required for the oxidative coupling form complexes with the pyridyl-subunits of **L1** as well. Furthermore it seems that metal free oligomers of **L1** have only limited solubility. However, in the most successful attempt traces of the dimers of **L1** have been observed by MALDI-ToF mass spectrometry. In this attempt CuCl (4.71 mg, 46.1  $\mu\text{mol}$ , 10 eq.) and TMEDA (6.99  $\mu\text{L}$ , 46.1  $\mu\text{mol}$ , 10 eq.) were dissolved in DCM (50 mL). The reaction mixture was saturated with oxygen before the ligand **L1** (2.00 mg, 4.61  $\mu\text{mol}$ , 1.0 eq) dissolved in DCM (20 mL) was added over a period of 4 hours. The procedure results in a maximum concentrations of the ligand **L1** of  $6.6 \cdot 10^{-8}$  mol/L. The reaction was monitored by MALDI-ToF mass spectrometry (see figure SI 15).

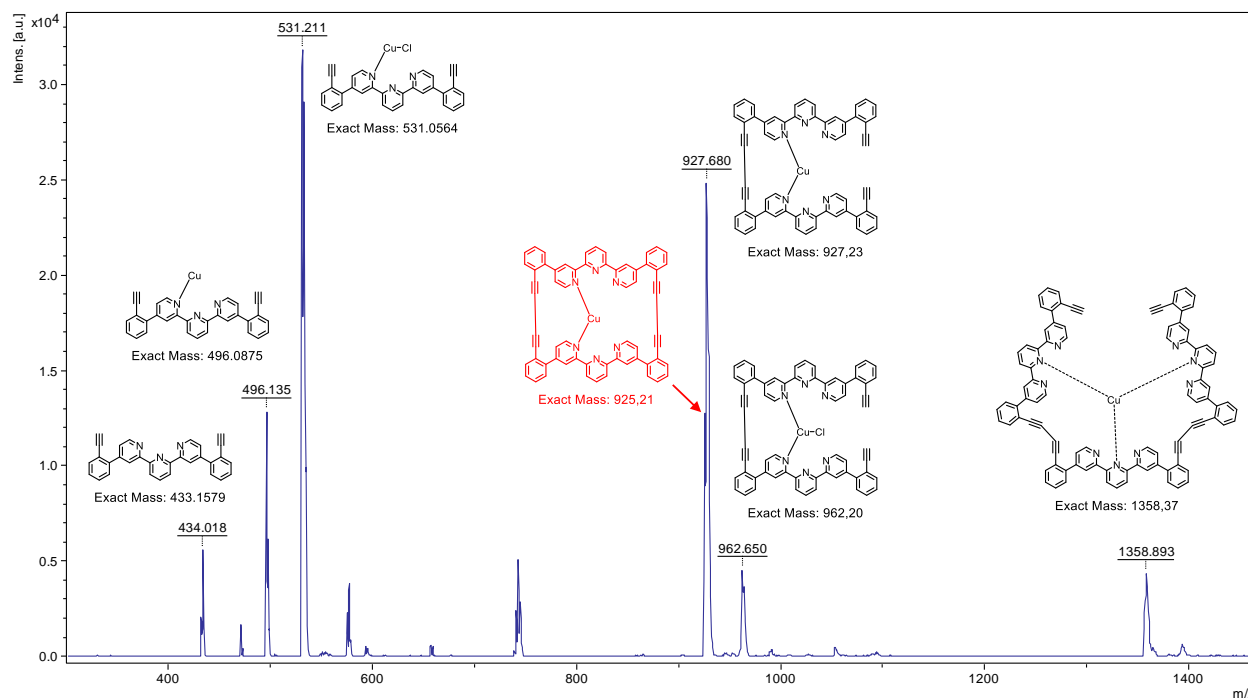

**Figure SI 15:** MALDI-ToF MS spectrum of the high dilution macrocyclization of ligand **L1**. The dimer and trimer seem to be a mixture between linked and open adducts.

The most prominent signals in the MS are the ones of the ligand **L1** and its copper adducts. But there are also signals that can be assigned to the copper adducts of the singly closed dimer of **L1** and even a weak signal that can be assigned to the copper complex of the doubly closed dimer of **L1**, which is the desired macrocycle  $(\mathbf{L1})_2$  (red arrow in Fig. SI 15). Interestingly, also the signal of the copper adduct of the next higher oligomer **L1**<sub>3</sub> can be detected. However, all attempts to isolate the macrocycle  $(\mathbf{L1})_2$  failed. After work up and extraction of the copper ions, exclusively the monomer **L1** was detected by analyzing the reaction mixture by HPLC. Whether the traces of

the macrocycle were too little for the detection threshold of the HPLC-MS device or its detection was hampered by its solubility features we are not able to distinguish.

Closer inspection of the MALDI-ToF MS signal of the **Cu-L1**<sub>2</sub> adducts (Fig. SI 16) suggest that the signal corresponds to about a 4:5 mixture of the copper adducts of the doubly closed macrocycle and the single closed open dimer.

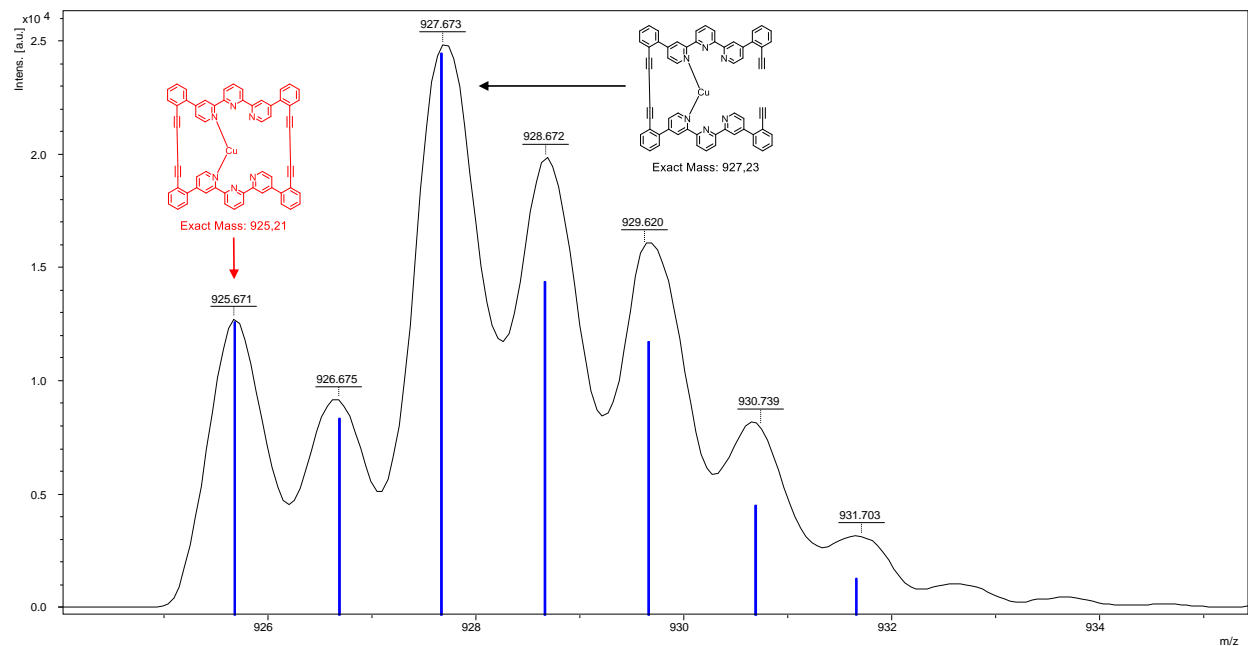

**Figure SI 16:** MALDI-ToF MS signal of the **Cu-L1**<sub>2</sub> adducts region. The solid black line is the recorded MALDI-ToF MS signal and the blue lines is the expected isotope pattern for a 4/5 mixture of the doubly closed macrocyclic copper adduct (sketched in red) and the copper adduct of the one-fold closed dimer of **L1** (displayed in black).

It seems that in spite of the intramolecular nature of the second oxidative acetylene coupling, the macrocyclization is not particularly favored. The working hypothesis is that the copper complex of the one-fold closed dimer does not arrange the remaining terminal acetylenes in a favorable position for the second ring closing reaction.

All together the unsuccessful template-free macrocyclization attempts contrast the high yields in the macrocyclization reactions of the M(II) complexes and thus underscore the importance of the template approach.
